# Supplementary material for: Ruthenium(ii) and iridium(iii) complexes featuring NHC–sulfonate chelate
Source: Royal Society of Chemistry journal article supplement (doi:10.1039/c5dt02867a), 2015-01-01
Supplement: c5dt02867a1.pdf [file c5dt02867a1.pdf]

**Ruthenium(II) and Iridium(III) complexes featuring NHC-Sulfonate chelate**

A. Rajaraman,<sup>a</sup> A. R. Sahoo,<sup>a</sup> F. Hild,<sup>a</sup> C. Fischmeister,<sup>\*a</sup> M. Achard<sup>\*a</sup>, C. Bruneau<sup>a</sup>

**Supporting Information**

**Table of Contents**

|                                                      |    |
|------------------------------------------------------|----|
| General Information.....                             | S2 |
| General Experimental Procedure for N-alkylation..... | S4 |
| NMR Spectra of Compounds.....                        | S5 |

## General Information:

All reactions were carried out under argon atmosphere using Schlenk tube techniques. Unless stated, reagents were purchased from commercial sources and used as received. Solvents (toluene, dichloromethane) were dried using a MBraun Solvent Purification System. Chloroform was HPLC grade and used as received. The reactions were monitored using a Shimadzu 2014 gas chromatograph equipped with an Equity<sup>TM</sup> – 1 Fused Silica capillary column (30 m x 0.25 mm x 0.25  $\mu$ m) and a FID detector. <sup>1</sup>H NMR spectra were recorded on a Bruker Avance (400 MHz) spectrometer and reported in ppm with reference to CDCl<sub>3</sub> (7.26 ppm) or CD<sub>2</sub>Cl<sub>2</sub> (5.32 ppm). Data are reported as follows: s=singlet, d=doublet, t=triplet, q=quartet, qu=quintet, sept=septuplet, m=multiplet, br=broad. Coupling constants are reported in Hz. <sup>13</sup>C NMR spectra were recorded at 100.6 MHz on the same spectrometer and reported in ppm with reference to CDCl<sub>3</sub> (76 ppm) or CD<sub>2</sub>Cl<sub>2</sub> (53.8 ppm).

- Mesithyl imidazole **3** was prepared according to reported procedure<sup>1</sup>

- *N*-(2,4,6-Trimethylphenyl)-*N'*-sulfomethylimidazolium **4**

A dried 500 mL Schlenk tube was loaded with 1 g (5.37 mmol) of mesithyl imidazole **4**, 40 mL of dibromomethane and 40 mL of water. This biphasic reaction mixture was vigorously stirred at 90 °C for 16 h. 1.7 g (13.4 mmol, 2.5 equiv.) of sodium sulfite were then added and the reaction stirred for 7 h at 90 °C (See <sup>1</sup>H NMR Imidazolium crude). The reaction mixture was allowed to cool down to r.t. and the two phases were separated. The aqueous phase was washed by 3x20 mL of dichloromethane. The aqueous phase was placed at + 4°C to crystallize the desired imidazolium salt. If necessary, crystallization was repeated to decrease the amount of residual BrCH<sub>2</sub>SO<sub>3</sub>Na. The desired product was obtained as white crystals in 30-40 % yield. <sup>1</sup>H NMR (400 MHz, (CD<sub>3</sub>)<sub>2</sub>SO)  $\delta$  9.44 (s, 1H), 7.98 (s, 1H), 7.88 (s, 1H), 7.14 (s, 2H), 5.04 (s, 2H), 2.33 (s, 3H), 2.01 (s, 6H). <sup>13</sup>C NMR (75 MHz, (CD<sub>3</sub>)<sub>2</sub>SO)  $\delta$  140.7, 138.7, 134.7, 131.7, 129.7, 124.7, 123.5, 63.6, 21.1, 17.3. NMR data were consistent with reported data.<sup>2</sup>

CCDC 1414725 contains the supplementary crystallographic data for **4**

<sup>1</sup> M. G. Gardiner, W. A. Herrmann, C.-P. Reisinger, J. Schwarz, M. Spiegler, *J. Organomet. Chem.*, **1999**, 572, 239-247.

<sup>2</sup> Y. Nagai, T. Kochi, K. Nozaki, K. *Organometallics*, **2009**, 28, 6131

An X-ray molecular structure of compound **4** was recorded

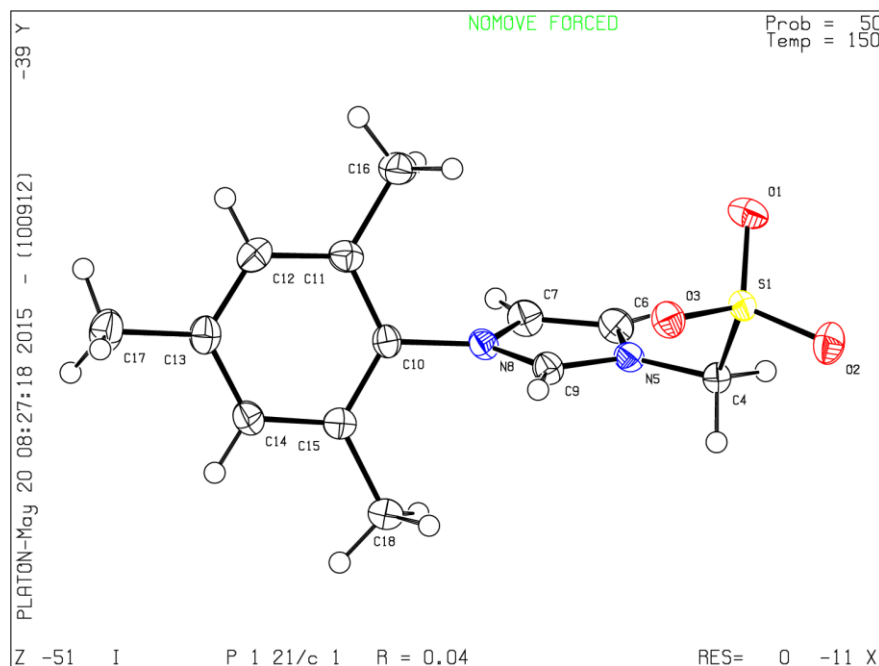

- Silver-NHC complex **Ag-1** was prepared according to the reported procedure.<sup>1</sup>

NMR data were consistent with reported data

<sup>1</sup>H NMR (400 MHz, CDCl<sub>3</sub>) δ 7.75 (brs, 1H), 6.96 (brs, 1H), 6.77 (brs, 2H), 5.52 (brs, 2H), 2.06 (s, 3H), 1.70 (s, 6H); <sup>13</sup>C NMR (75 MHz, CDCl<sub>3</sub>) δ 23.1, 27.8, 65.6, 122.2, 129.0, 134.8, 145.8, 181.9.

#### - Synthesis of Ruthenium(NHC) complex **Ru-1**:

To a vacuum dried Schlenk tube containing [Ru(*p*-cymene)Cl<sub>2</sub>]<sub>2</sub> (80 mg, 0.13 mmol, 0.5 eq.) in DCM, silver NHC complex **Ag-1** (100 mg, 0.26 mmol, 1.0 eq) was added and the reaction mixture was stirred at 45 °C for 16 h. The reaction mixture was filtered over celite to remove AgCl. Concentration in vacuo of the red solution afforded the expected complex. Crystallization by layering with pentane and dichloromethane provided orange crystals (85 %). <sup>1</sup>H NMR (400 MHz, CDCl<sub>3</sub>) δ 7.18 (br, 1H, C<sub>mes</sub>-H), 7.07 (br, 1H, C<sub>mes</sub>-H), 7.04 (d, *J* = 2.0 Hz, 1H, C<sub>NHC</sub>-H), 6.91 (d, *J* = 2.0 Hz, 1H, C<sub>NHC</sub>-H), 5.73 (d, *J* = 6.2 Hz, 1H, C<sub>cym</sub>-H), 5.45 (d, *J* = 13.2 Hz, 1H, CH<sub>2</sub>SO<sub>3</sub>), 5.35 (brs, 1H, C<sub>cym</sub>-H), 5.22 (d, *J* = 4.0 Hz, 1H, C<sub>cym</sub>-H), 4.47 (d, *J* = 13.2 Hz, 1H, CH<sub>2</sub>SO<sub>3</sub>), 3.30 (brs, 1H, C<sub>cym</sub>-H), 2.77 (sept, *J* = 7.2 Hz, 1H, H-CMe<sub>2</sub>), 2.43 (s, 3H, C<sub>mes</sub>-CH<sub>3</sub>), 2.39 (s, 3H,

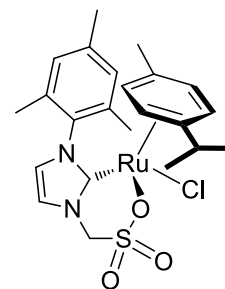

$C_{mes-CH_3}$ , 2.02 (s, 3H,  $C_{mes-CH_3}$ ), 1.84 (s, 3H,  $C_{cym-CH_3}$ ), 1.18 (2dd, t app.,  $J = 7.2$  Hz, 6H, H-C(Me)<sub>2</sub>); <sup>13</sup>C NMR (75 MHz, CD<sub>2</sub>Cl<sub>2</sub>) δ 171.1 ( $C_{NHC-Ru}$ ), 141.5 ( $C_{mes-quat.}$ ), 138.0 ( $C_{mes-quat.}$ ), 137.9 ( $C_{mes-quat.}$ ), 135.7 ( $C_{mes-quat.}$ ), 130.1 ( $C_{mes-H}$ ), 130.0 ( $C_{mes-H}$ ), 125.4 ( $C_{NHC-H}$ ), 123.2 ( $C_{NHC-H}$ ), 104.1 ( $C_{cym}$ ), 94.6 (br,  $C_{cym-H}$ ), 93.0 ( $C_{cym}$ ), 78.8 (br,  $C_{cym-H}$ ), 78.7 ( $C_{cym-H}$ ), 77.7 ( $C_{cym-H}$ ), 63.6 (CH<sub>2</sub>SO<sub>3</sub>), 30.4 (CHMe<sub>2</sub>), 24.0, 21.5, 20.4, 18.7, 18.6, 18.2 (CH<sub>3</sub>).

HRMS (ESI) [M·Cl]<sup>+</sup> (C<sub>23</sub>H<sub>29</sub>N<sub>2</sub>O<sub>3</sub>SRu) Th: 515.09369; Exp: 515.0943

Elemental analysis for C<sub>23</sub>H<sub>29</sub>ClN<sub>2</sub>O<sub>3</sub>RuS

Theoretical: C, 50.22; H, 5.31; N, 5.09; S, 5.83

Measured: C, 49.69; H, 5.62; N, 4.93; S, 5.84

CCDC 1414617 contains the supplementary crystallographic data for **Ru-1**

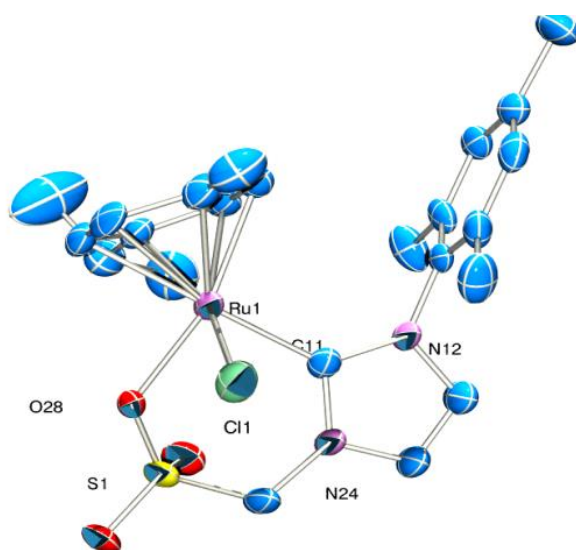

**Ru-1 Complex:** Selected bonds lengths (Å): Ru(1)-Cl(1), 2.405; Ru(1)-O(28), 2.157; Ru(1)-C(1), 2.088; Selected bond angles (deg): O(28)-Ru(1)-C(1), 88.7; O(28)-Ru(1)-Cl(1), 88.11; Cl(1)-Ru(1)-C(1), 83.18

### - Synthesis of Iridium(NHC) complex Ir-1:

To a vacuum dried Schlenk tube containing [Ir(Cp\*)Cl<sub>2</sub>]<sub>2</sub> (0.5 eq) in DCM, silver NHC complex (1.0 eq) was added and the reaction mixture was stirred at 45 °C for 16h. Then solution was filtered over celite to remove AgCl. Concentration in vacuo of the reddish yellow solution afforded the expected complex. Crystalization by layering with pentane and dichloromethane gave the yellow crystals (81 %). <sup>1</sup>H NMR (400 MHz, CD<sub>2</sub>Cl<sub>2</sub>) δ 7.33 (d,  $J = 2.0$  Hz, 1H,  $C_{NHC-H}$ ), 6.99 (s, 2H,  $C_{mes-H}$ ), 6.52 (d,  $J = 2.0$  Hz, 1H,  $C_{NHC-H}$ ), 5.20 (d,  $J = 13.2$  Hz, 1H, CH<sub>2</sub>SO<sub>3</sub>), 4.77 (d,  $J = 13.2$  Hz, 1H, CH<sub>2</sub>SO<sub>3</sub>), 2.34 (s, 3H,  $C_{mes-CH_3}$ ), 2.14 (s, 3H,  $C_{mes-CH_3}$ ), 2.08 (s, 3H,  $C_{mes-CH_3}$ ), 1.35 (s, 15H, Cp\*); <sup>13</sup>C NMR (100 MHz, CD<sub>2</sub>Cl<sub>2</sub>) δ 161.5 ( $C_{NHC-Ir}$ ), 140.3 ( $C_{mes-quat.}$ ), 138.4 ( $C_{mes-$

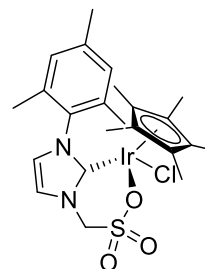

quat.), 136.2 (C<sub>mes</sub>-quat.), 135.4 (C<sub>mes</sub>-quat.), 130.1 (C<sub>mes</sub>-quat.), 129.0 (C<sub>mes</sub>-quat.), 125.1 (C<sub>mes</sub>-H), 125.0 (C<sub>mes</sub>-H), 90.9 (Cp\*), 64.8 (CH<sub>2</sub>SO<sub>3</sub>), 21.3 (C<sub>mes</sub>-Me), 19.8 (C<sub>mes</sub>-Me), 18.8 (C<sub>mes</sub>-Me), 9.7 (Cp\*)

HRMS (ESI) [M-Cl]<sup>+</sup> (C<sub>23</sub>H<sub>30</sub>N<sub>2</sub>O<sub>3</sub>SIr) Th: 607.16011; Exp: 607.1603

Elemental analysis for C<sub>23</sub>H<sub>30</sub>N<sub>2</sub>O<sub>3</sub>ClSIr

Theoretical: C, 43.01; H, 4.71; N, 4.36; S, 4.99

Measured: C, 42.82; H, 4.38; N, 4.39; S, 4.74

CCDC 1414618 contains the supplementary crystallographic data for **Ir-1**

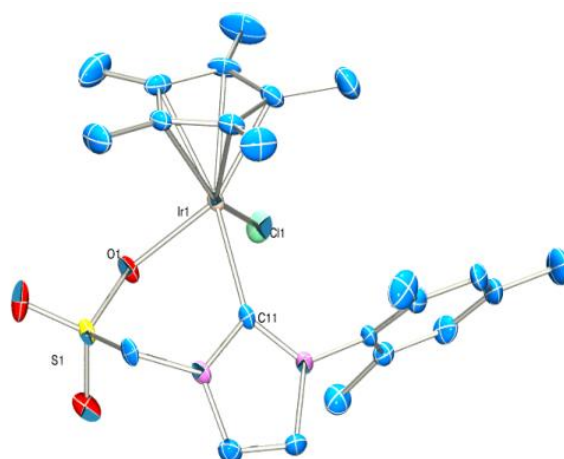

Crystal structure of Ir(NHC) Complex

**Ir(NHC) Complex** : Selected bonds lengths (Å): Ir(1)-Cl(1) , 2.374; Ir(1)-O(1) , 2.226; Ir(1)-C(1), 2.058; Selected bond angles (deg): C(1)-Ir(1)-Cl(1), 89.35; C(1)-Ir(1)-O(31), 89.27; Cl(1)-Ir(1)-O(31), 82.31.

#### - Synthesis of Ruthenium(NHC) complex **Ru-2**:

To a vacuum dried Schlenk tube containing [Ru(*p*-cymene)(OAc)<sub>2</sub>] (1 eq) in DCM, silver NHC complex **Ag-1** (1.0 eq) was added and the reaction mixture was stirred at 45 °C for 16 h. The reaction mixture was filtered over celite to remove AgCl. Concentration *in vacuo* of the brown solution afforded the expected complex **Ru-2**. Precipitation by layering with pentane and dichloromethane provided brown powder (40 %). An alternative pathway involves the reaction of **Ru-1** (1 eq.) with potassium acetate (1.8 eq.) in dichloromethane at 50 °C overnight followed by cannulation and concentration *in vacuo* to yield **Ru-2**; This complex could not be crystallized. Its purity was estimated to 95% by <sup>1</sup>H NMR. <sup>1</sup>H NMR (400 MHz, CDCl<sub>3</sub>) δ 8.02 (brs, 1H, C<sub>NHC</sub>-H), 7.06 (brs, 1H, C<sub>mes</sub>-H), 6.98 (s, 1H, C<sub>mes</sub>-H), 6.96 (d, *J* = 2.0 Hz, 1H, C<sub>NHC</sub>-H), 6.06 (d, *J* = 5.8

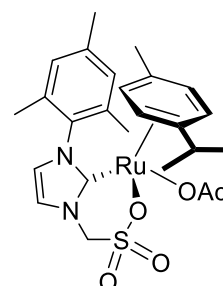

Hz, 1H, C<sub>cym</sub>-H), 5.99-5.98 (m, 1H, C<sub>cym</sub>-H), 5.61-5.59 (m, 1H, C<sub>cym</sub>-H), 5.16 (d, *J*= 5.8 Hz, 1H, C<sub>cym</sub>-H), 4.82 (d, *J*= 13.3 Hz, 1H, CH<sub>2</sub>SO<sub>3</sub>), 4.76 (d, *J*= 13.3 Hz, 1H, CH<sub>2</sub>SO<sub>3</sub>), 2.36 (s, 3H, C<sub>mes</sub>-CH<sub>3</sub>), , 2.27 (s, 3H, C<sub>mes</sub>-CH<sub>3</sub>), 1.96 (s, 3H, C<sub>mes</sub>-CH<sub>3</sub>), 1.85 (s, 3H), 1.63 (s, 3H), 1.60-1.52 (m, 1H, H-CMe<sub>2</sub>), 1.09 (d, *J*= 6.9 Hz, 3H), 0.98 (d, *J*= 6.9 Hz, 3H); <sup>13</sup>C NMR (75 MHz, CDCl<sub>3</sub>) δ 187.4 (C=O) , 174.7 (C<sub>NHC</sub>-Ru), 138.7 (C<sub>mes</sub>-quat.), 135.7 (C<sub>mes</sub>-quat.), 135.3 (C<sub>mes</sub>-quat.), 134.8 (C<sub>mes</sub>-quat.), 128.6 (C<sub>mes</sub>-H), 127.7 (C<sub>mes</sub>-H), 124.2 (C<sub>NHC</sub>-H), 123.6 (C<sub>NHC</sub>-H), 99.2 (C<sub>cym</sub>quat.), 91.1 (C<sub>cym</sub>quat.), 87.8 (C<sub>cym</sub>H), 85.1 (C<sub>cym</sub>H), 81.4 (C<sub>cym</sub>H), 79.9 (C<sub>cym</sub>H), 64.1 (CH<sub>2</sub>SO<sub>3</sub>), 29.5 (CHMe<sub>2</sub>), 22.5, 22.3, 20.6, 19.9, 17.4, 16.5, 16.3.

## General procedure for *N*-alkylation:

A 25 mL Schlenk tube was flushed with argon and equipped with a magnetic stirring bar. The flask was charged with alcohol (1.2 eq) and catalyst (1 mol%). The mixture was stirred at room temperature for 5 minutes before adding amine (1.0 eq). Afterwards, the mixture was stirred at 130 °C for 24 hours. Then the reaction mixture was cooled down to room temperature and was analyzed by GC. The crude mixture was purified by column chromatography using neutral alumina and a mixture of pentane and diethyl ether as eluent. <sup>1</sup>H NMR spectra were recorded on a Bruker Avance (400 MHz) spectrometer and reported in ppm with reference to (CD<sub>3</sub>)<sub>2</sub>CO (2.05 ppm). <sup>13</sup>C NMR spectra were recorded at 100.6 MHz on the same spectrometer and reported in ppm with reference to (CD<sub>3</sub>)<sub>2</sub>CO (206.26 ppm).

**1-benzylpiperidine:** Colourless oil (85%). <sup>1</sup>H NMR (400 MHz, *acetone-d6*): δ 7.33-7.27 (m, 4H), 7.23-7.22 (m, 1H), 3.42(s, 2H), 2.35 (br, 4H), 1.57-1.51(m, 4H), 1.44-1.42 (m, 2H); <sup>13</sup>C NMR (100.6 MHz, *acetone-d6*): δ 140.5, 130.0, 129.2, 127.8, 64.6, 55.5, 27.1, 25.5.

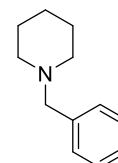

NMR data were consistent with reported data<sup>3</sup>

**1-benzylpyrrolidine:** Colourless oil (90%). <sup>1</sup>H NMR (400 MHz, *acetone-d6*): δ 7.34-7.27 (m, 4H), 7.23-7.21 (m, 1H), 3.58 (s, 2H), 2.46-2.43 (m, 4H), 1.72 (qu, *J* = 3.2 Hz, 2H); <sup>13</sup>C NMR (100.6 MHz, *acetone-d6*): δ 141.2, 129.6, 129.2, 127.7, 61.2, 54.8, 24.5.

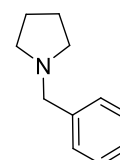

NMR data were consistent with reported data<sup>4</sup>

**4-benzylmorpholine:** Colourless oil (65%). <sup>1</sup>H NMR (400 MHz, *acetone-d6*): δ 7.35-7.29 (m, 4H), 7.25-7.22 (m, 1H), 3.60 (t, *J* = 4.8 Hz, 4H), 3.47 (s, 2H), 2.38 (t, *J* = 4.8 Hz, 4H); <sup>13</sup>C NMR (100.6 MHz, *acetone-d6*): δ 139.4, 129.9, 129.1, 127.9, 67.6, 64.0, 54.6.

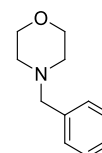

NMR data were consistent with reported data<sup>5</sup>

<sup>3</sup> G. A. Molander, P. E. Gormisky, D. L. Sandrock, *J. Org. Chem.*, **2008**, *73*, 2052-2057.

<sup>4</sup> J. M. J. Williams, A. Pettman, D. van der Waals, *RSC Advances*, **2014**, *4*, 51845-51849.

**1,4-dibenzylpiperazine:** White solid (81%).  $^1\text{H}$  NMR (400 MHz, *acetone-d6*):  $\delta$  7.33-7.28 (m, 8H), 7.24-7.22 (m, 2H), 3.48 (s, 4H), 2.43 (br, 8H);  $^{13}\text{C}$  NMR (100.6 MHz, *acetone-d6*):  $\delta$  140.0, 129.9, 129.2, 127.9, 63.7, 54.2. NMR data were consistent with reported data<sup>6</sup>

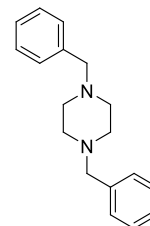

**N-benzylaniline:** White solid (64%).  $^1\text{H}$  NMR (400 MHz, *acetone-d6*):  $\delta$  7.40 (d,  $J = 7.6$  Hz, 2H), 7.32 (t,  $J = 7.6$  Hz, 2H), 7.30 (t,  $J = 7.6$  Hz, 1H), 7.09 (t,  $J = 7.2$  Hz, 2H), 6.67 (d,  $J = 8.0$  Hz, 2H), 6.59 (t,  $J = 7.2$  Hz, 1H), 5.39 (s, 1H), 4.35 (d,  $J = 5.6$  Hz, 2H);  $^{13}\text{C}$  NMR (100.6 MHz, *acetone-d6*):  $\delta$  149.8, 141.3, 129.8, 129.2, 128.2, 127.6, 117.4, 113.6, 48.2. NMR data were consistent with reported data.<sup>7</sup>

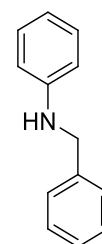

**1-hexylpiperidine:** Colourless oil (85%).  $^1\text{H}$  NMR (400 MHz, *acetone-d6*):  $\delta$  2.30 (br, 4H), 2.22 (t,  $J = 7.2$  Hz, 2H), 1.54-1.49 (m, 4H), 1.45-1.38 (m, 4H), 1.32-1.28 (m, 6H), 0.89 (t,  $J = 6.8$  Hz, 3H);  $^{13}\text{C}$  NMR (100.6 MHz, *acetone-d6*):  $\delta$  60.3, 55.7, 32.9, 28.3, 28.1, 27.2, 25.7, 23.7, 14.7. NMR data were consistent with reported data.<sup>8</sup>

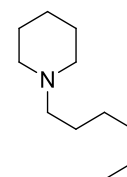

**1-hexylpyrrolidine:** Colourless oil (71%).  $^1\text{H}$  NMR (400 MHz, *acetone-d6*):  $\delta$  3.17 (br, 4H), 3.00 (t,  $J = 8.0$  Hz, 2H), 2.02-1.98 (m, 4H), 1.83-1.75 (m, 2H), 1.38-1.29 (m, 6H), 0.88 (t,  $J = 6.8$  Hz, 3H);  $^{13}\text{C}$  NMR (100.6 MHz, *acetone-d6*):  $\delta$  55.6, 53.8, 32.2, 27.4, 26.7, 24.0, 23.2, 14.3. NMR data were consistent with reported data.<sup>9</sup>

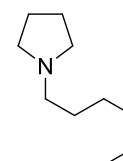

<sup>5</sup> O. O. Kovalenko, A. Volkov, H. Adolfson, *Org. Lett.*, **2015**, *17*, 446-449.

<sup>6</sup> L. L. R. Lorentz-Petersen, L. U. Nordstrom, R. Madsen, *Eur. J. Org. Chem.*, **2012**, *34*, 6752-6759.

<sup>7</sup> A. S. Kumari, D. D. Pathak, *Tetrahedron Lett.*, **2015**, *56*, 4135-4142.

<sup>8</sup> G. Liu, Z. Li, H. Geng, X. Zhang, *Catal. Sci. Technol.*, **2014**, *4*, 917-921.

<sup>9</sup> X. Li, Z. Zheng, S. Garg, B. Twamley, J. M. Shreeve, *Eur. J. Inorg. Chem.*, **2008**, *21*, 3353-3358.

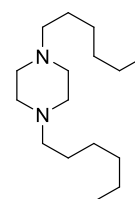



**1,4-dihexylpiperazine:** Colourless oil (56%).  $^1\text{H}$  NMR (400 MHz, *acetone-d6*):  $\delta$  2.37 (br, 8H), 2.25 (t,  $J = 7.2$  Hz, 4H), 1.44-1.41 (m, 4H), 1.32-1.29 (m, 12H), 0.88 (t,  $J = 6.8$  Hz, 6H);  $^{13}\text{C}$  NMR (100.6 MHz, *acetone-d6*):  $\delta$  59.5, 54.5, 32.8, 28.1, 27.9, 23.5, 14.6.

**1-hexyl-4-phenylpiperazine:** White solid (47%).  $^1\text{H}$  NMR (400 MHz, *acetone-d6*):  $\delta$  7.20 (t,  $J = 8.0$  Hz, 2H), 6.93 (d,  $J = 7.6$  Hz, 2H), 6.77 (t,  $J = 8.4$  Hz, 1H), 3.16 (t,  $J = 5.2$  Hz, 4H), 2.53 (t,  $J = 5.2$  Hz, 4H), 2.34 (t,  $J = 7.2$  Hz, 2H), 1.54-1.48 (m, 2H), 1.38-1.29 (m, 6H), 0.89 (t,  $J = 6.8$  Hz, 3H);  $^{13}\text{C}$  NMR (100.6 MHz, *acetone-d6*):  $\delta$  152.7, 129.8, 119.9, 116.6, 59.3, 54.3, 49.9, 32.7, 28.0, 27.8, 23.4, 14.5.  
NMR data were consistent with reported data.<sup>10</sup>

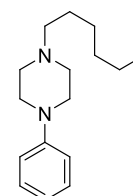

**1-(1-phenylethyl)pyrrolidine:** Yellow oil (70%).  $^1\text{H}$  NMR (400 MHz, *acetone-d6*):  $\delta$  7.34-7.27(m, 4H), 7.22-7.18 (m, 1H), 3.16 (q,  $J = 6.8$  Hz, 1H), 2.52-2.47 (m, 2H), 2.35-2.30 (m, 2H), 1.73-1.66 (m, 4H), 1.31 (d,  $J = 6.8$  Hz, 3H);  $^{13}\text{C}$  NMR (100.6 MHz, *acetone-d6*): 147.6, 129.2, 128.0, 127.7, 66.6, 53.5, 24.4, 24.3.  
NMR data were consistent with reported data.<sup>11</sup>

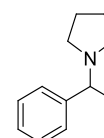

**1-(1-phenylethyl)piperidine:** Yellow oil (51%).  $^1\text{H}$  NMR (400 MHz, *acetone-d6*):  $\delta$  7.33-7.27 (m, 4H), 7.22-7.18 (m, 1H), 3.36 (q,  $J = 6.8$  Hz, 1H), 2.39-2.38 (m, 2H), 2.32-2.31 (m, 2H), 1.53-1.48 (m, 4H), 1.41-1.34(m, 2H), 1.29 (d,  $J = 6.8$  Hz, 3H);  $^{13}\text{C}$  NMR (100.6 MHz, *acetone-d6*): 145.9, 129.0, 128.4, 127.6, 65.8, 52.3, 27.3, 25.7, 19.8.  
NMR data were consistent with reported data.<sup>12</sup>

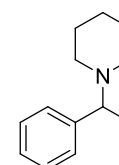

**4-(1-phenylethyl)morpholine:** Yellow oil (46%).  $^1\text{H}$  NMR (400 MHz, *acetone-d6*):  $\delta$  7.34-7.29 (m, 4H), 7.24-7.20 (m, 1H), 3.61-3.55 (m, 4H), 3.29 (q,  $J = 6.8$  Hz, 1H), 2.45-2.42 (m, 2H), 2.32-2.27 (m, 2H), 1.30 (d,  $J = 6.4$  Hz, 3H);  $^{13}\text{C}$  NMR (100.6 MHz, *acetone-d6*): 144.2, 128.0, 127.2, 126.6, 66.6, 64.8, 51.0, 19.2.  
NMR data were consistent with reported data.<sup>12</sup>

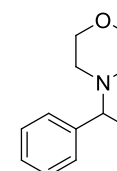

<sup>10</sup> I. Yavari, M. J. Bayat, M. Ghazanfarpour-Darjani, *Tetrahedron Lett.*, **2014**, 55, 5595-5596.

<sup>11</sup> A. J. A. Watson, A. C. Maxwell, J. M. J. Williams, *J. Org. Chem.*, **2011**, 76, 2328-2331.

<sup>12</sup> Y. Miki, K. Hirano, T. Satoh, M. Miura, *Angew. Chem. Int. Ed.*, **2013**, 52, 10830-10834.



### General procedure for etherification

A 25 mL Schlenk tube was flushed with argon, equipped with a magnetic stirring bar. The flask was charged with phenyl ethanol **6c** (0.1 mmol), and catalyst **Ru-1** (1 mol%). The reaction mixture was stirred at 130 °C for 24 h. The reaction progress was monitored by gas chromatography. The reaction mixture was then allowed to cool down to r.t. and the product isolated by column chromatography on silica gel employing a mixture of petroleum ether and ethyl acetate (95/5, v/v) as eluent. The product **12** was isolated in 45 % yield as a white oil.

<sup>1</sup>H NMR (400 MHz, *CD*<sub>2</sub>*Cl*<sub>2</sub>): δ 7.40-7.34 (m, 4H), 7.33-7.20(m, 14H), 4.54 (q, *J* = 8.0 Hz, 1,6H), 4.25 (q, *J* = 8.0 Hz, 2H), 1.46 (d, *J* = 8.0 Hz, 4,9H), 1.36 (d, *J* = 8.0 Hz, 6H); <sup>13</sup>C NMR (100.6 MHz, *CD*<sub>2</sub>*Cl*<sub>2</sub>): 145.0, 144.9, 129.0, 128.8, 127.9, 127.7, 126.9, 126.8, 75.2, 75.0, 54.3, 54.0, 54.00, 53.7, 25.1, 23.4

Compound **12** was obtained as a mixture of *dl* enantiomers and meso compounds in a 45/55 ratio

NMR data were consistent with reported data<sup>13</sup>

---

<sup>13</sup> C. H. Jin, H. Y. Lee, S. H. Lee, I. S. Kim, Y. H. Jung, *Synlett*, **2007**, 2695-2698.

### Imidazolium salt 4 crude

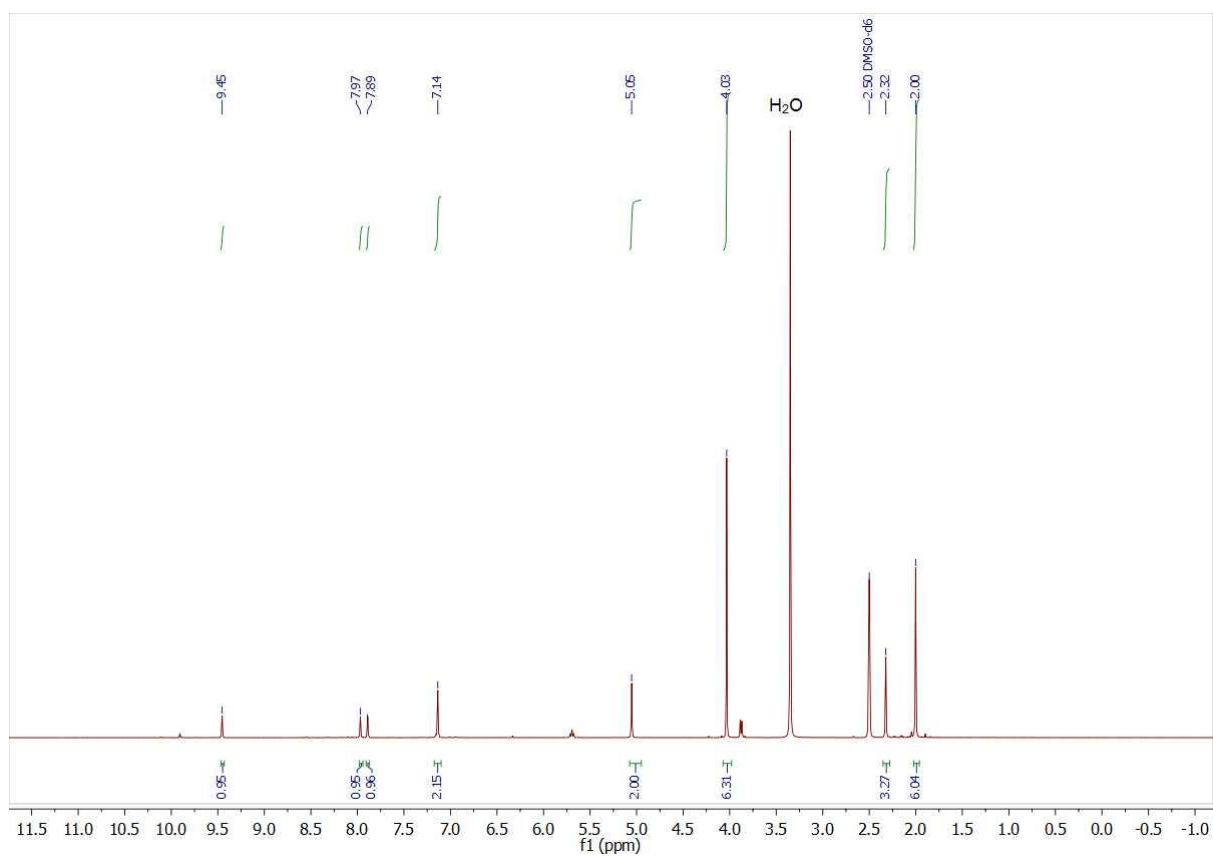

### Imidazolium salt 4 crystallised

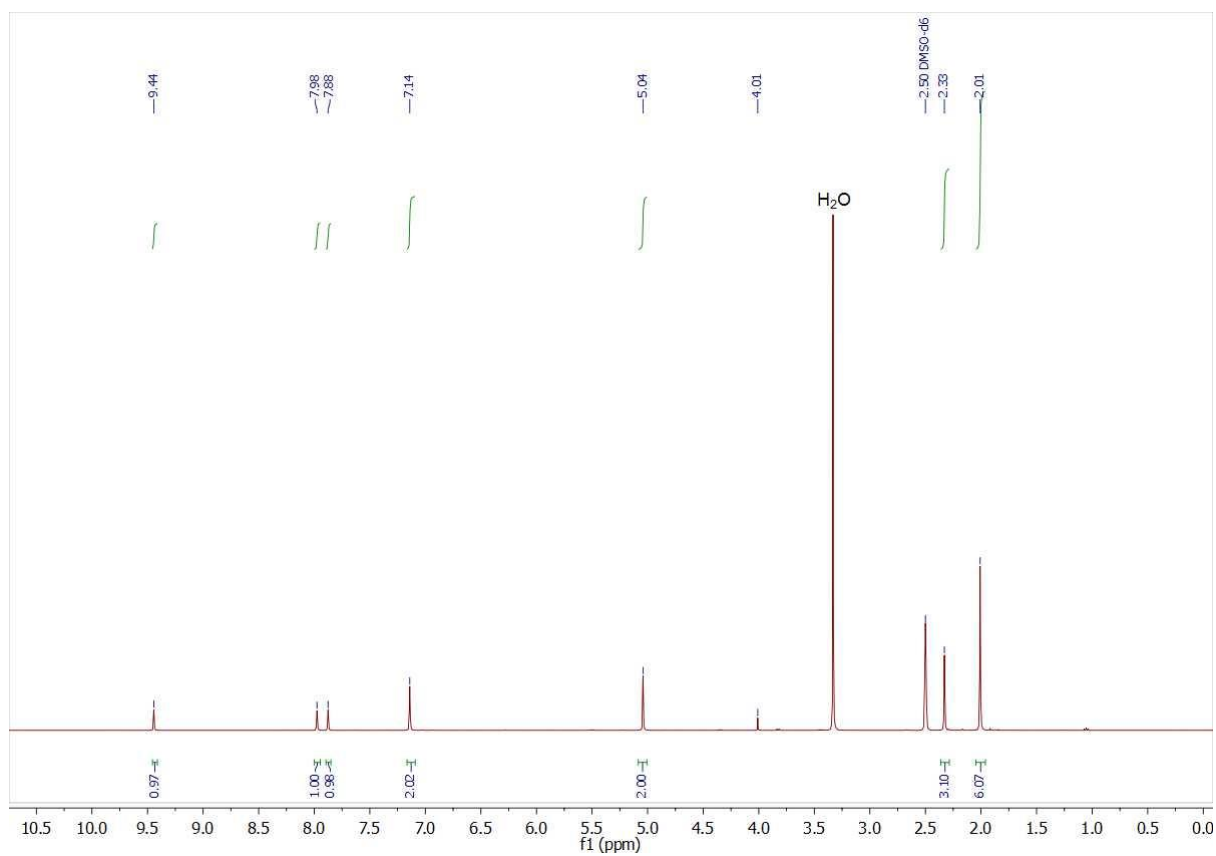

cfar 46.1.fid

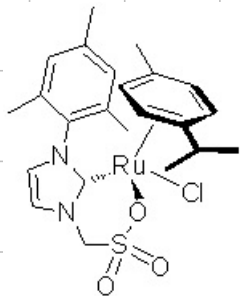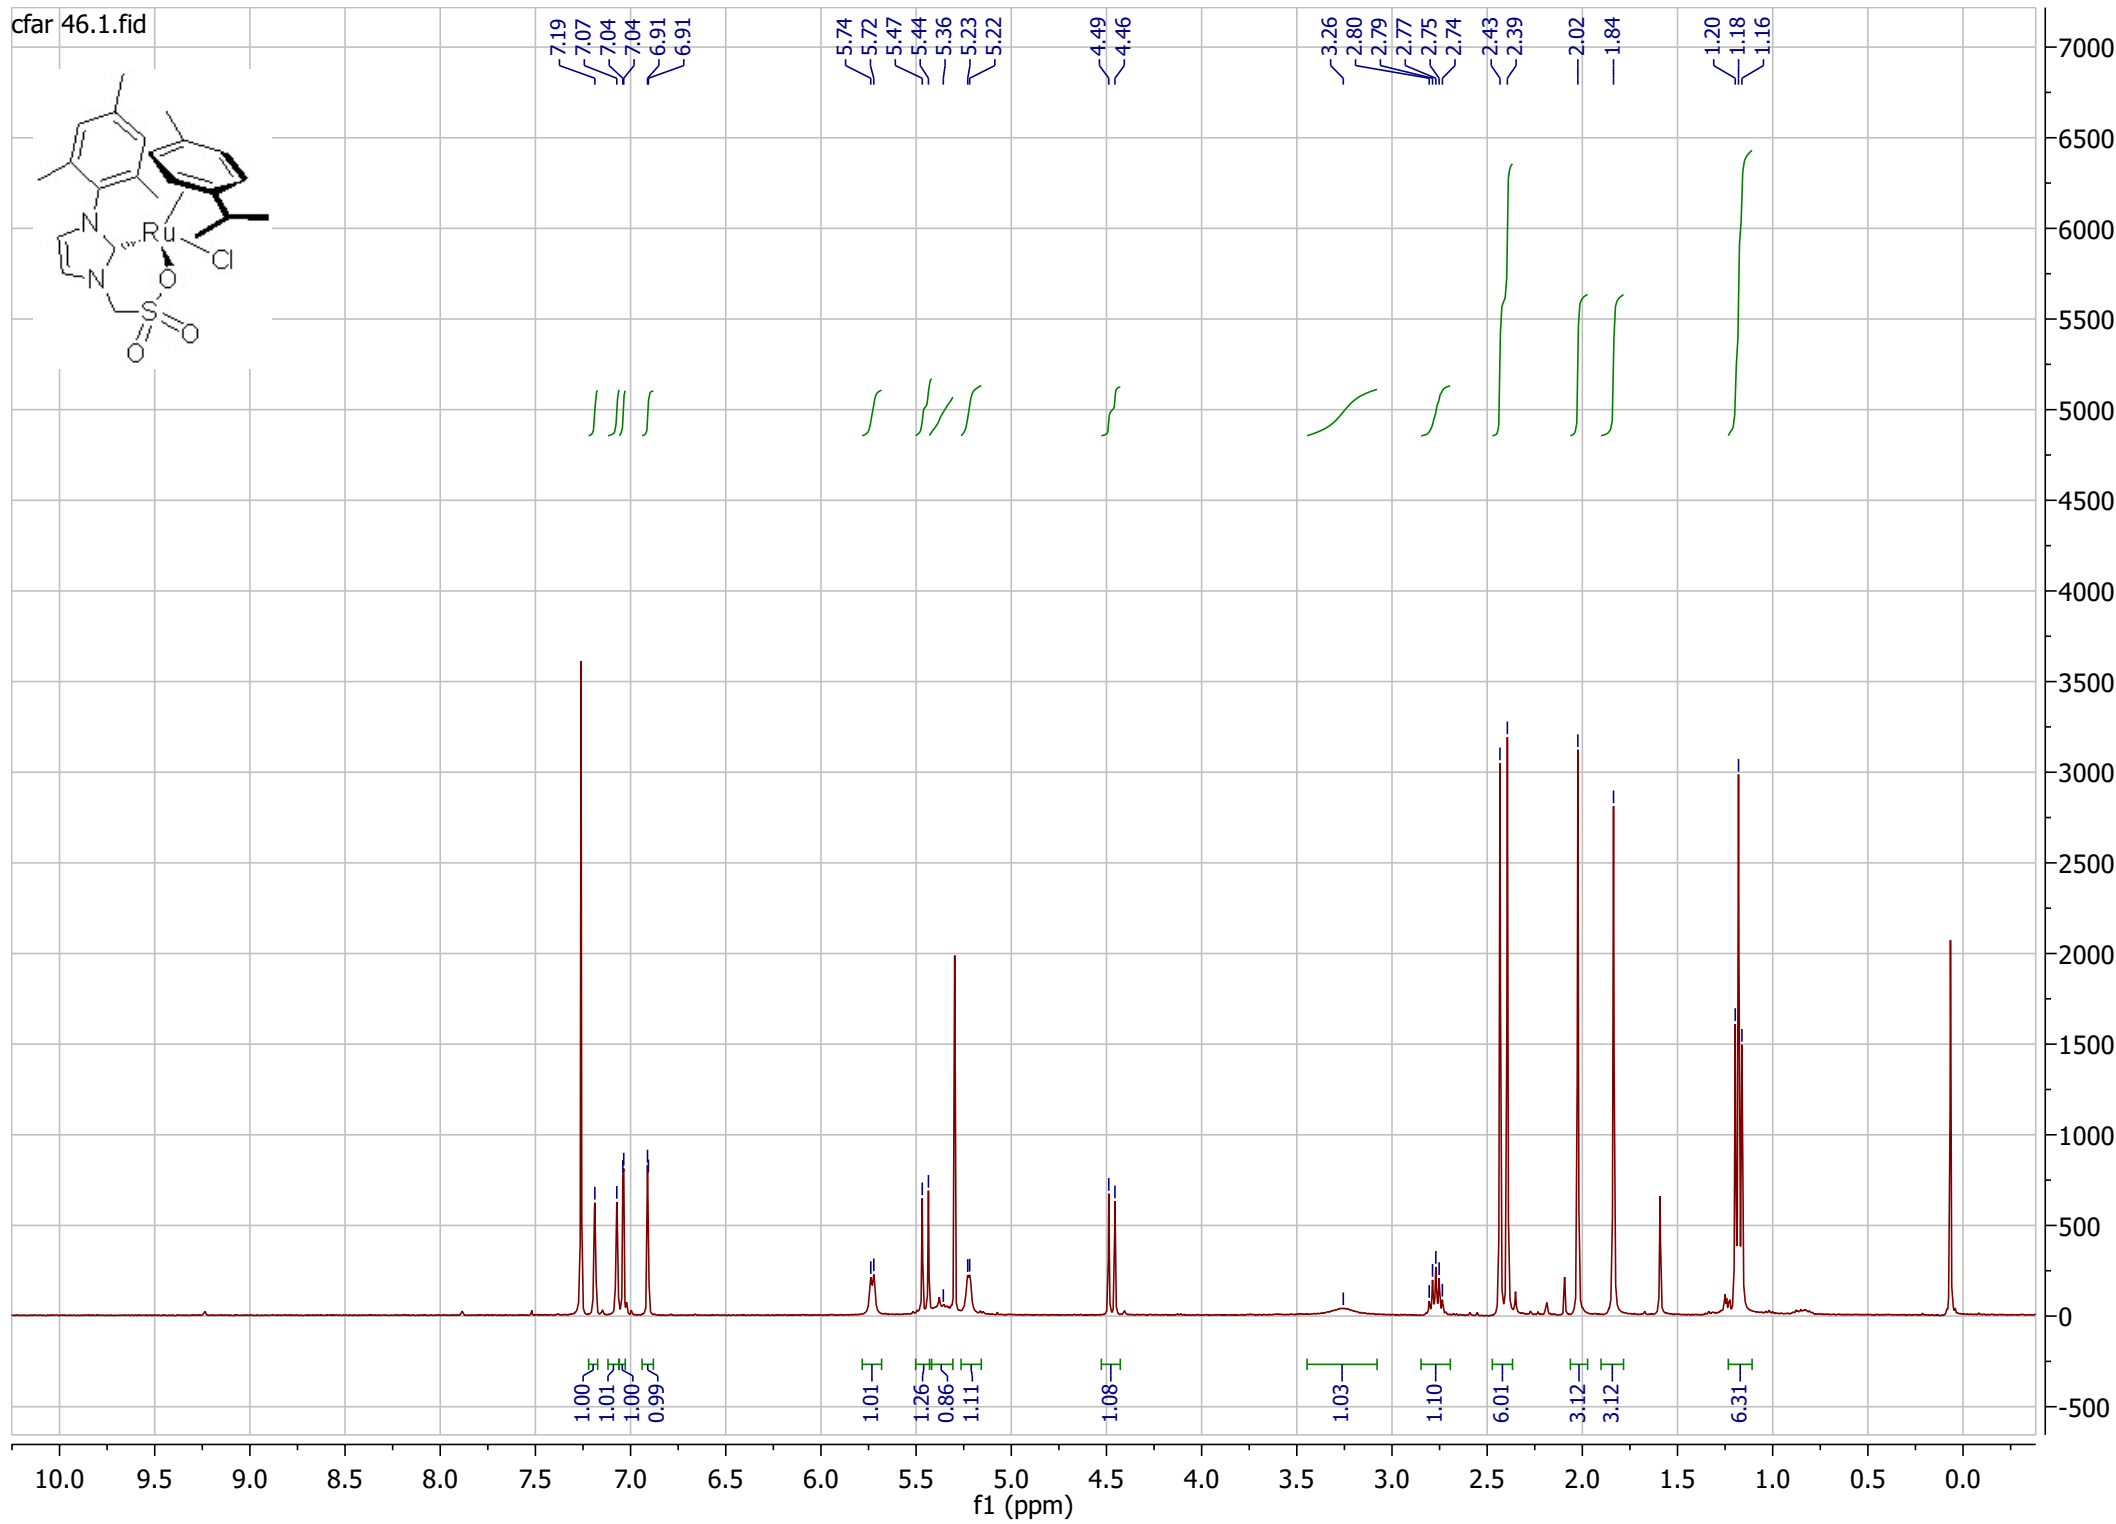

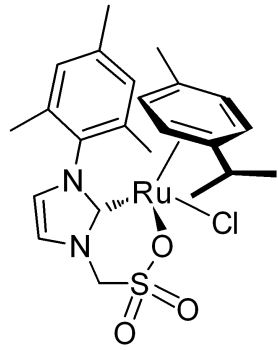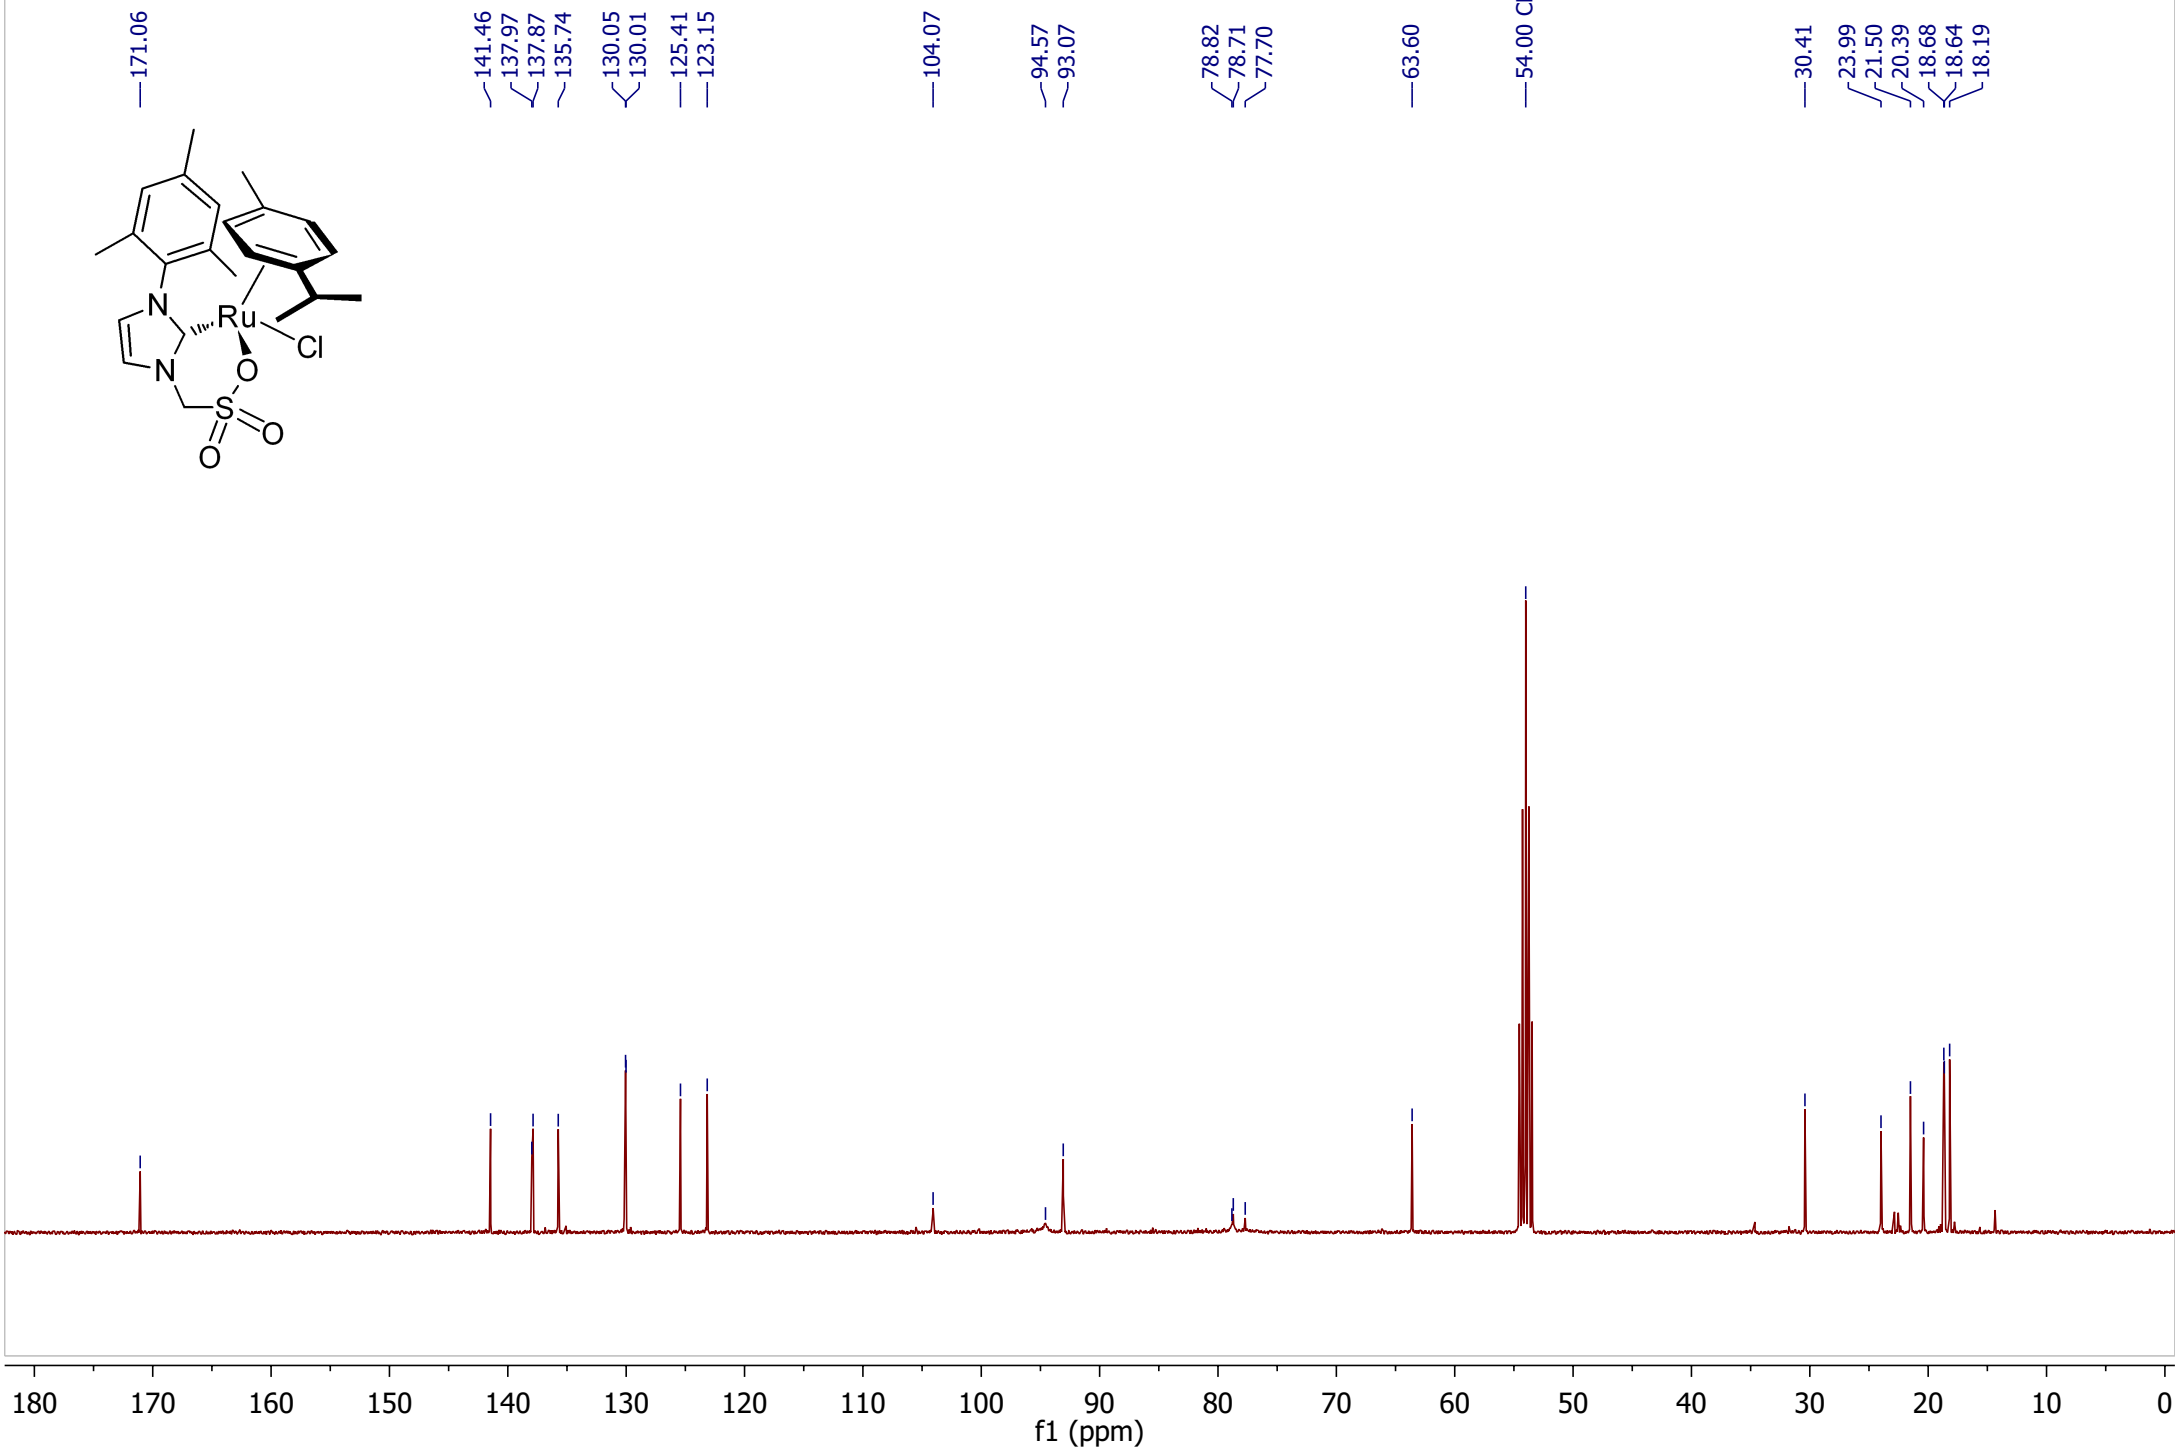

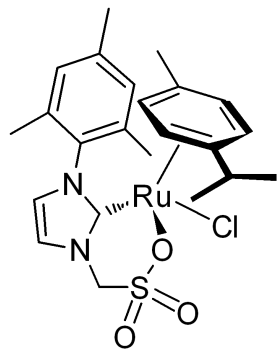130.06  
130.02125.43  
123.17

94.68

78.98

78.71

77.71

63.60

63.60

30.42

23.98

21.49

20.40

18.67

18.63

18.19

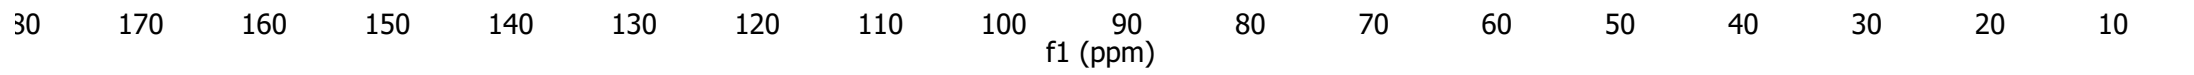

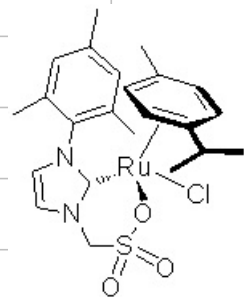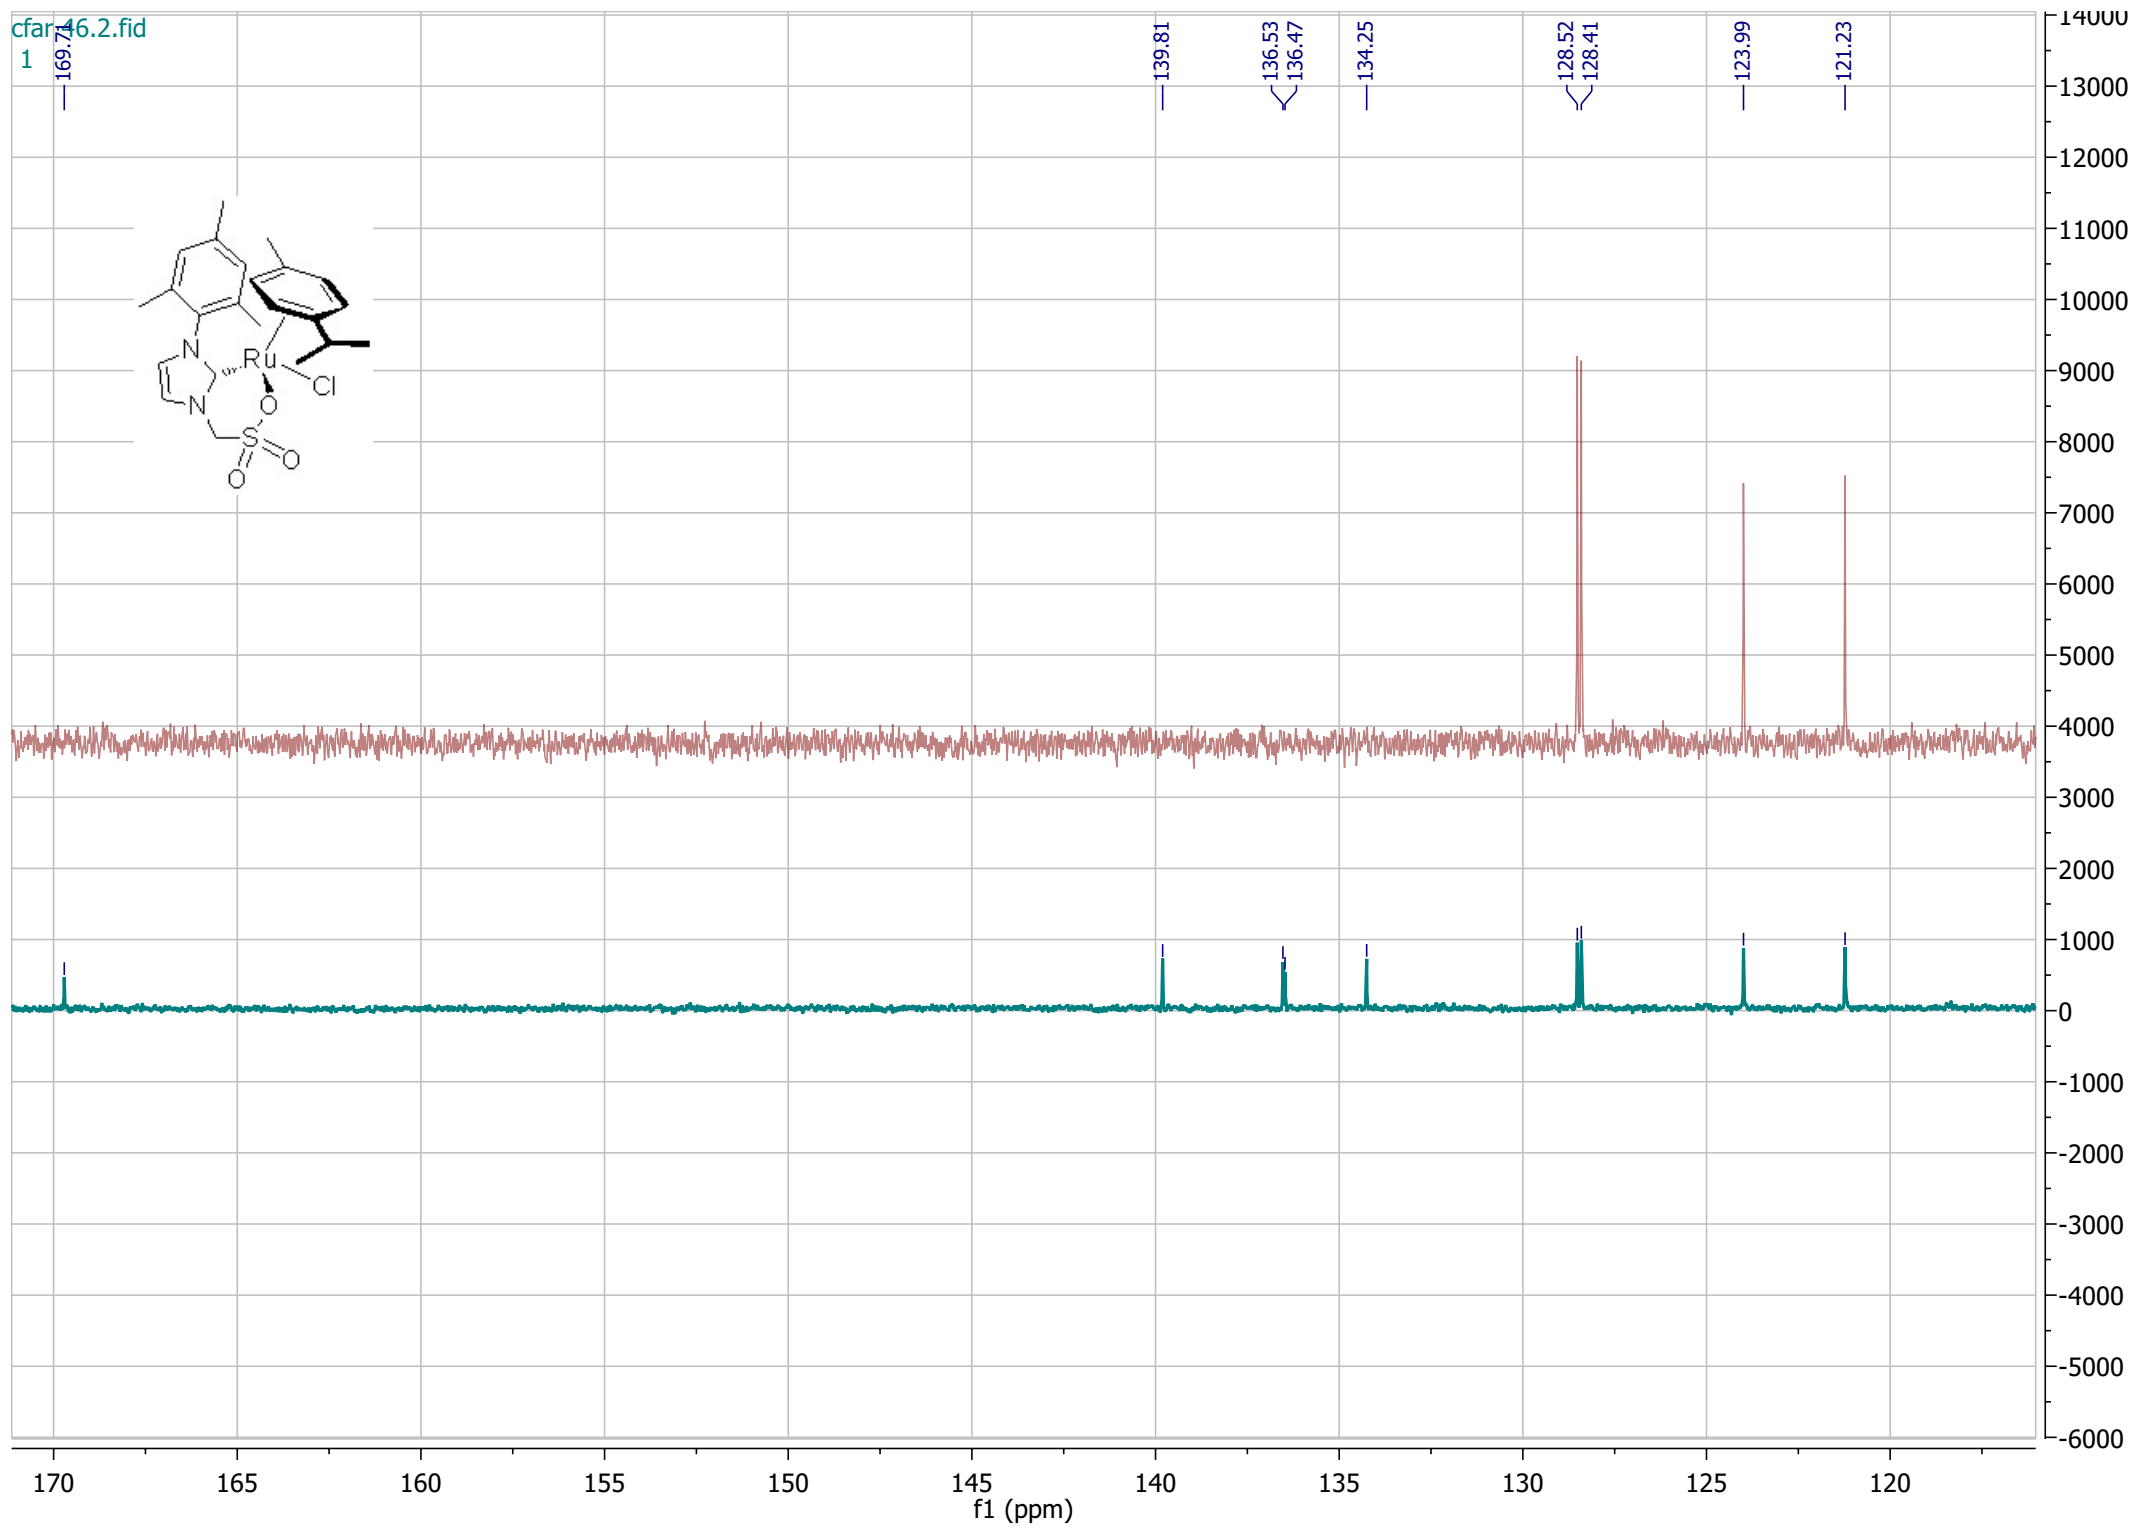



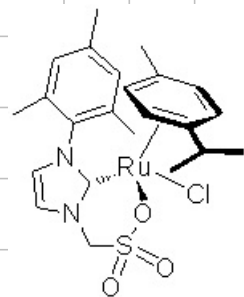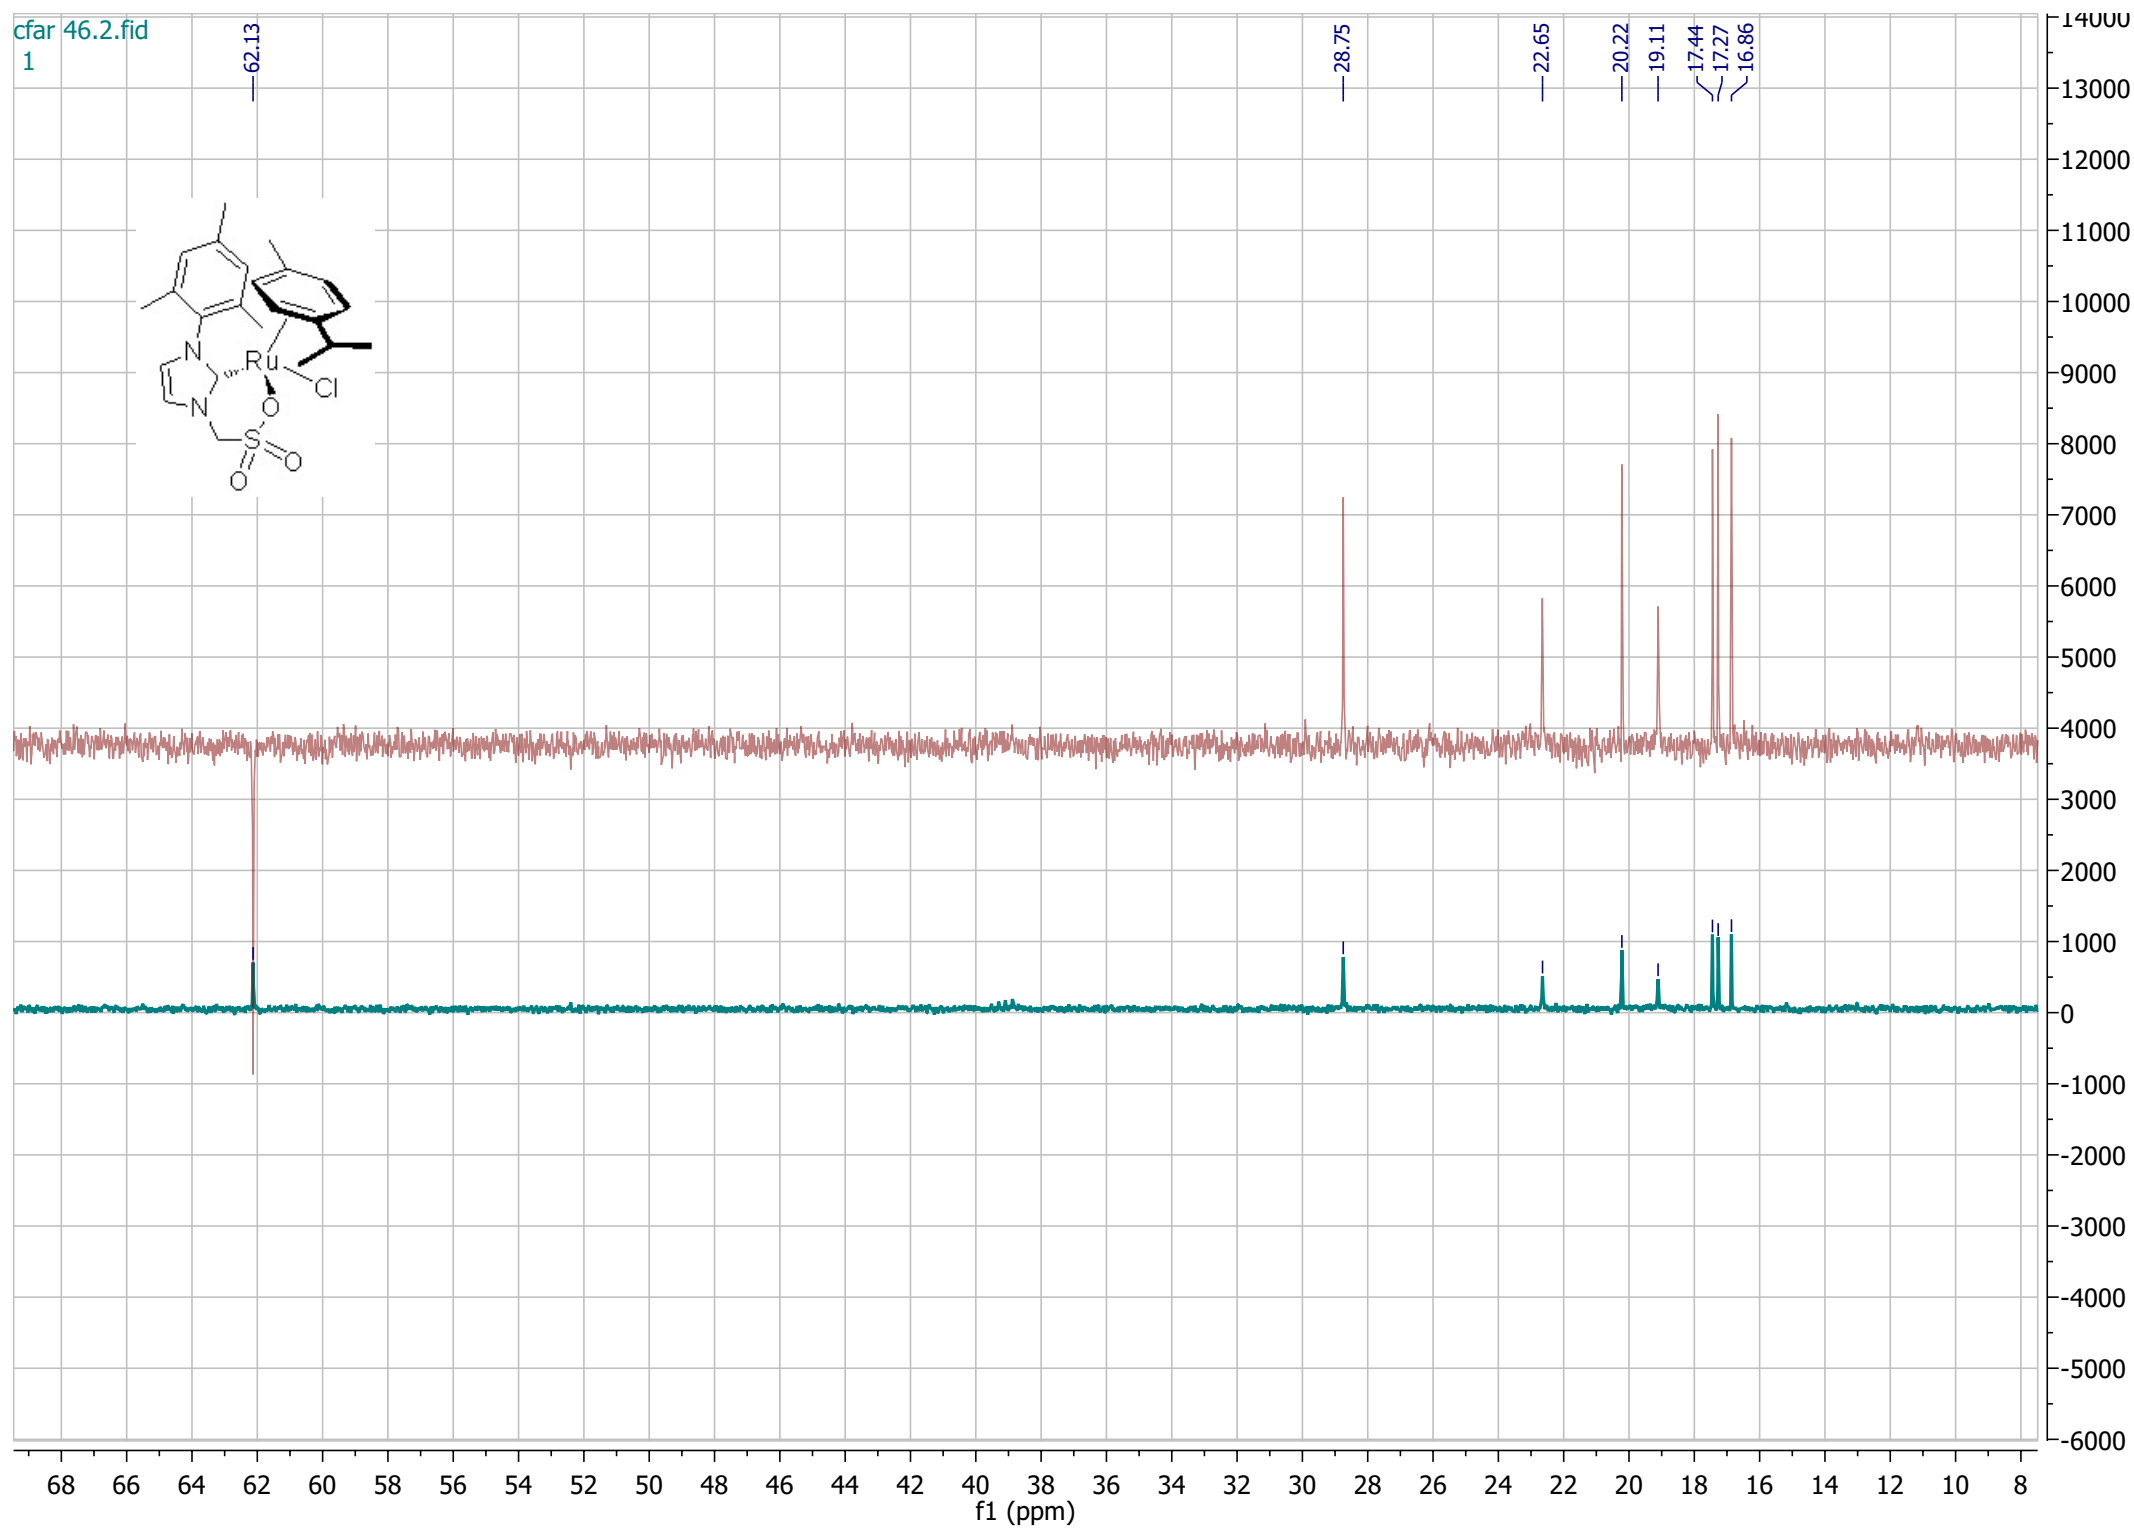

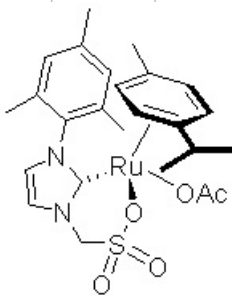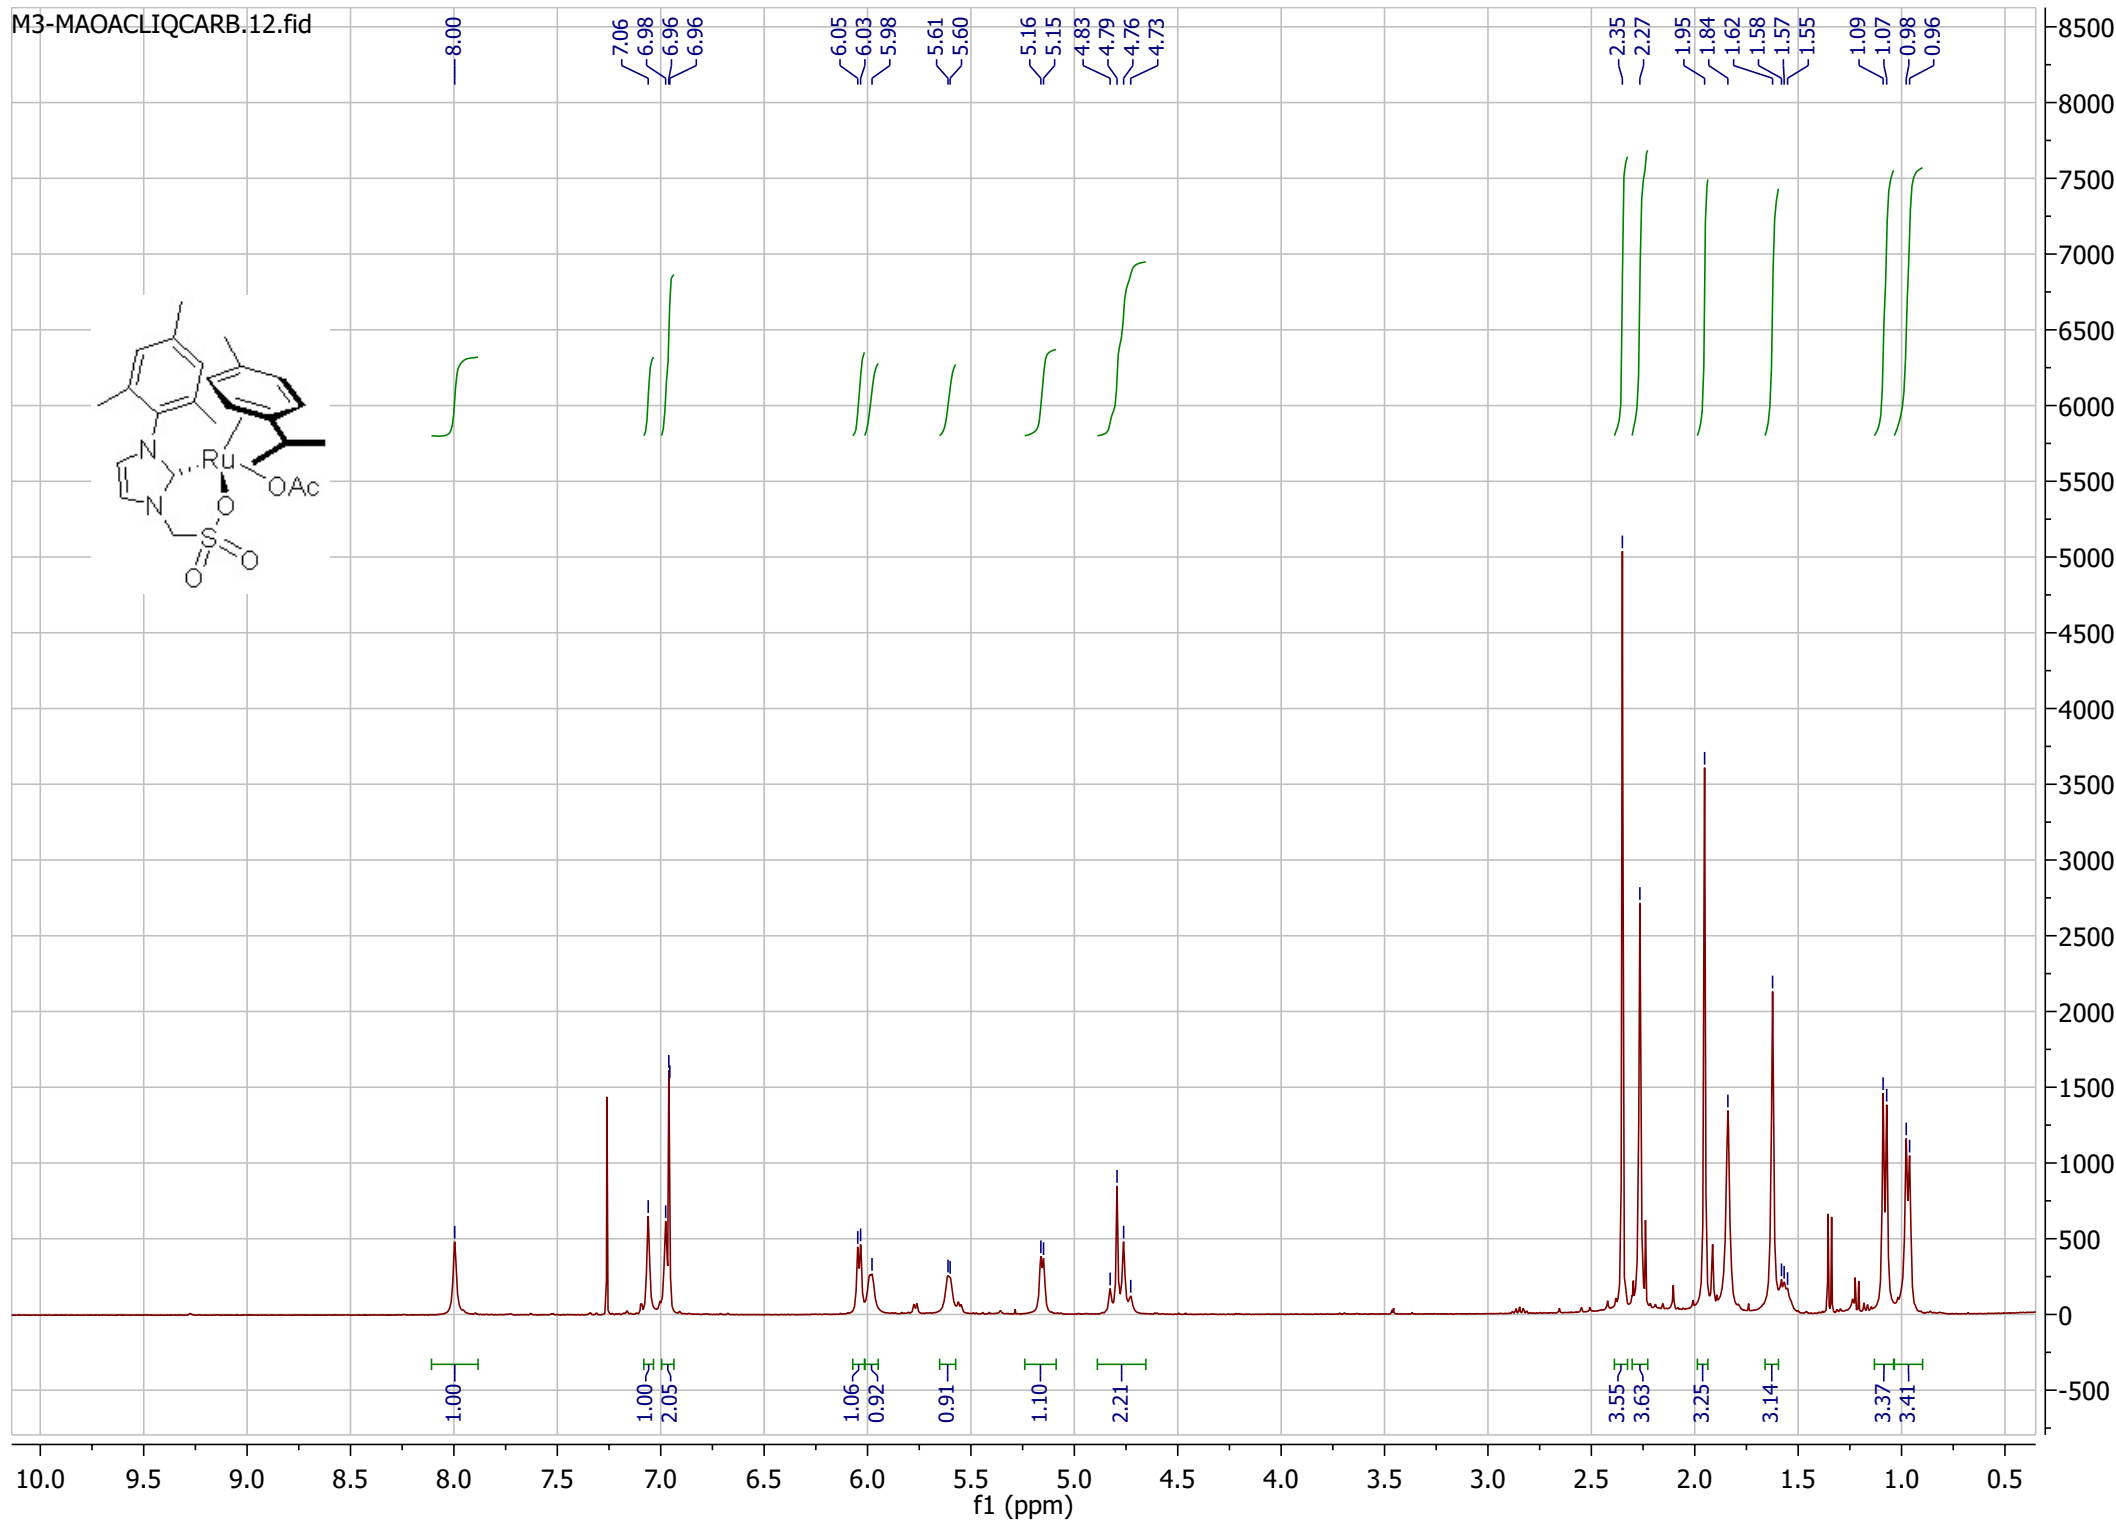

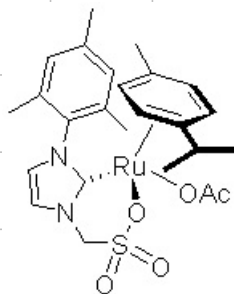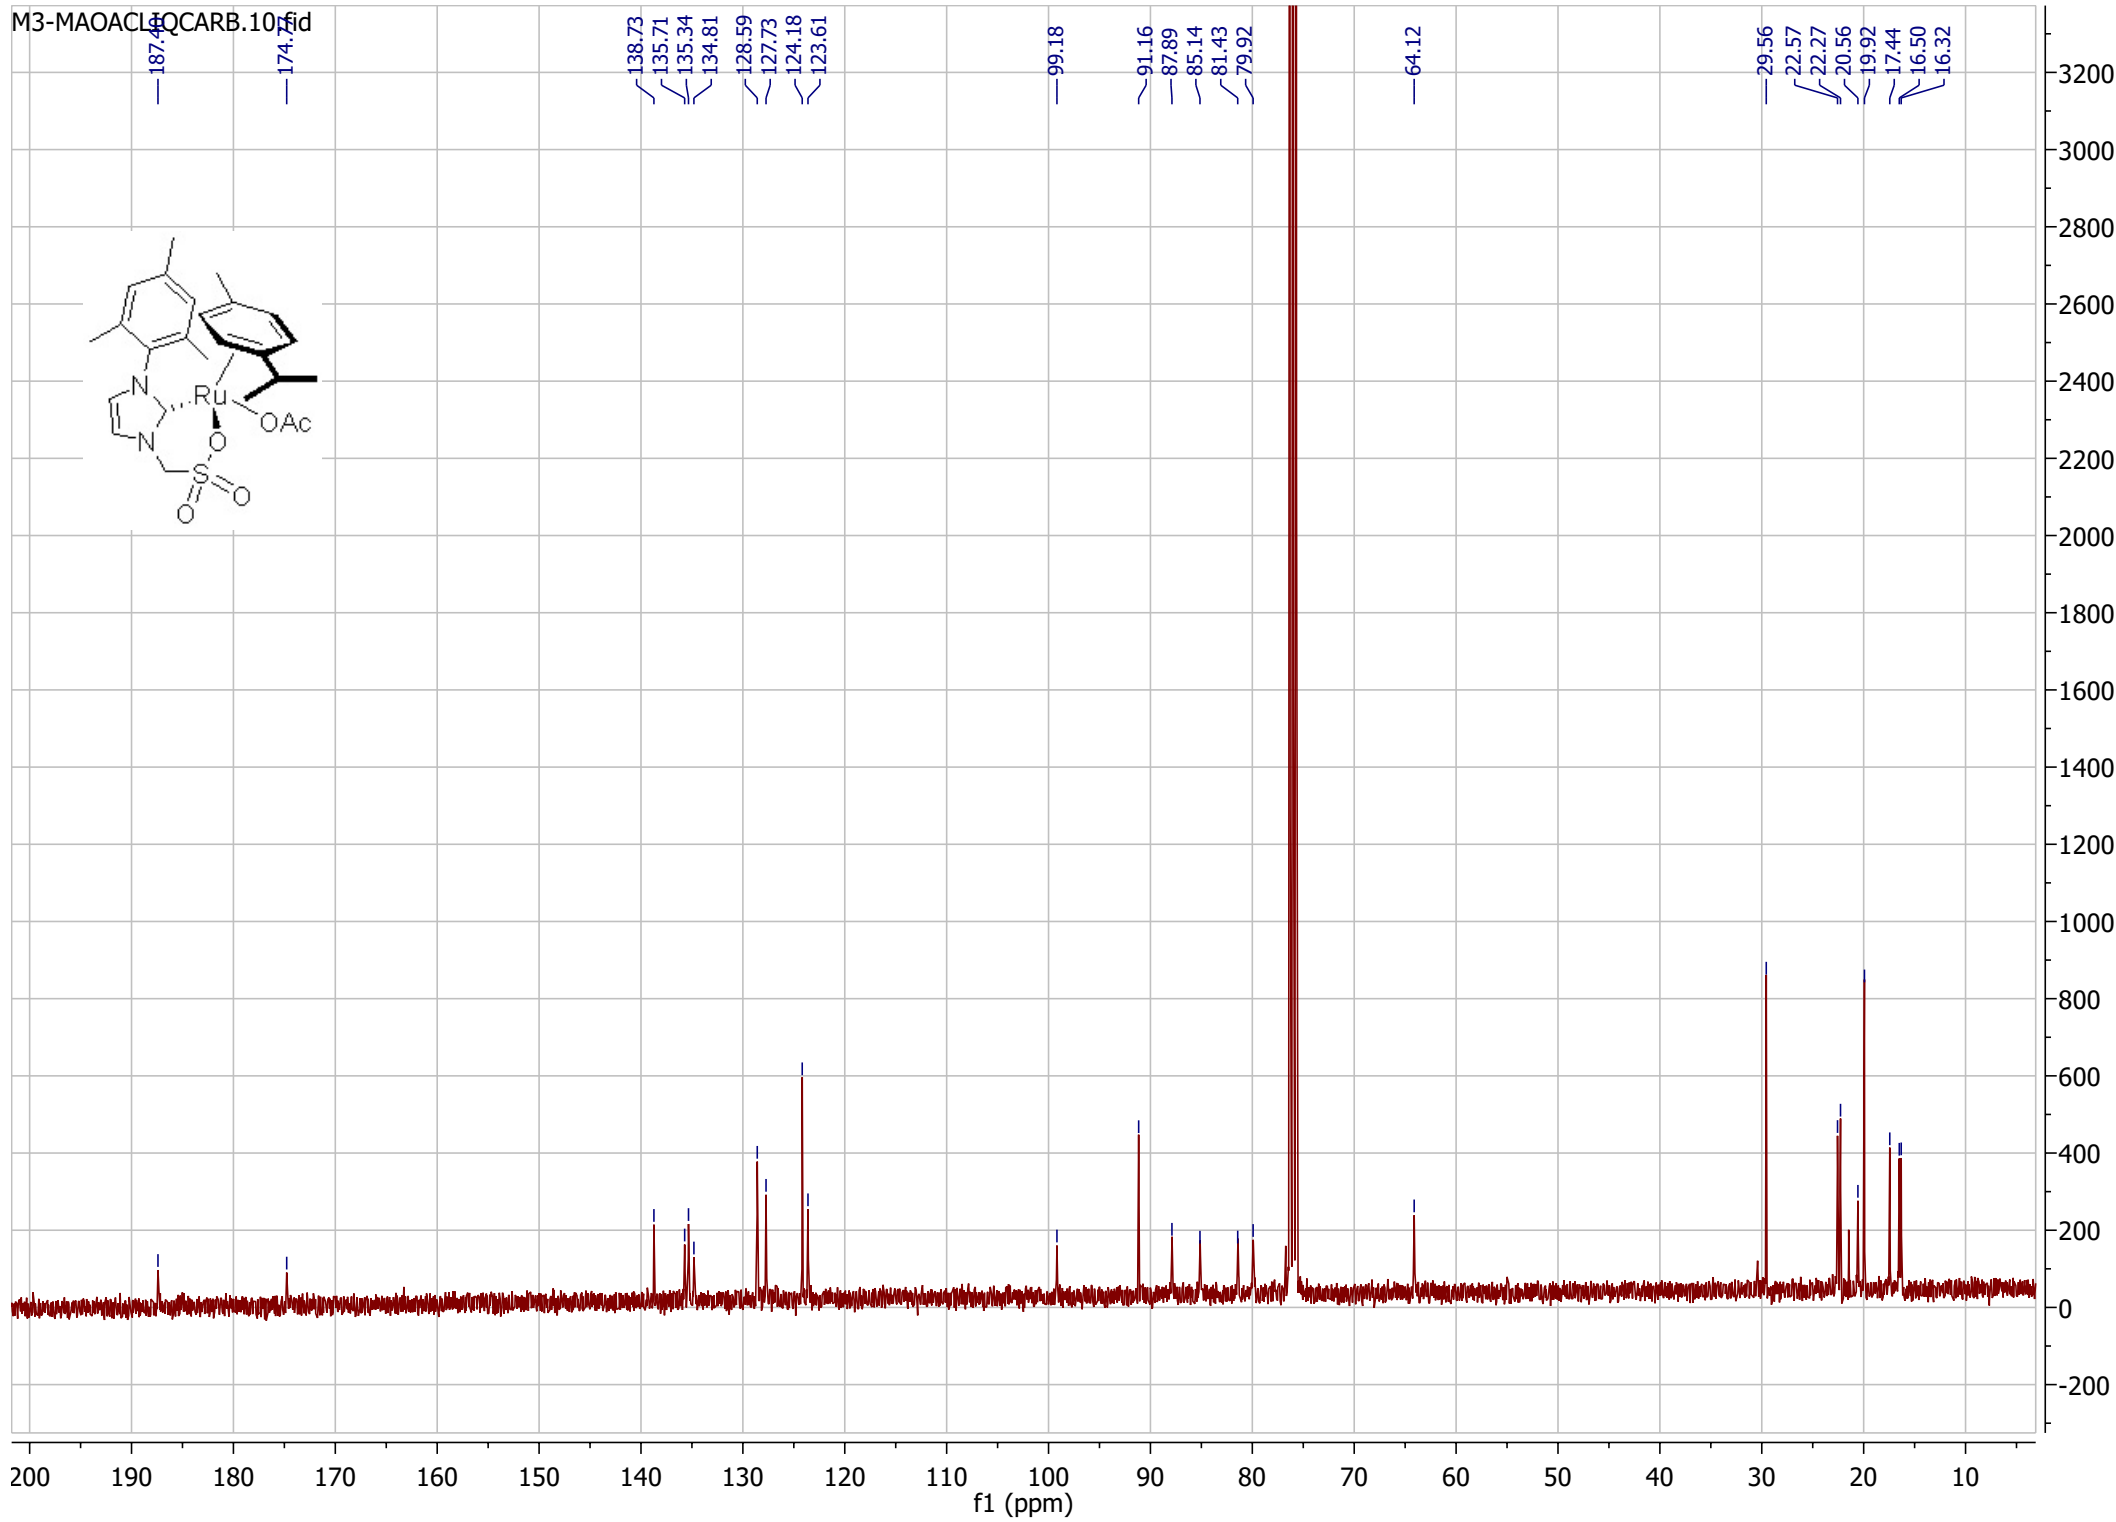

M3-MAOACLIQCARB.11.ser

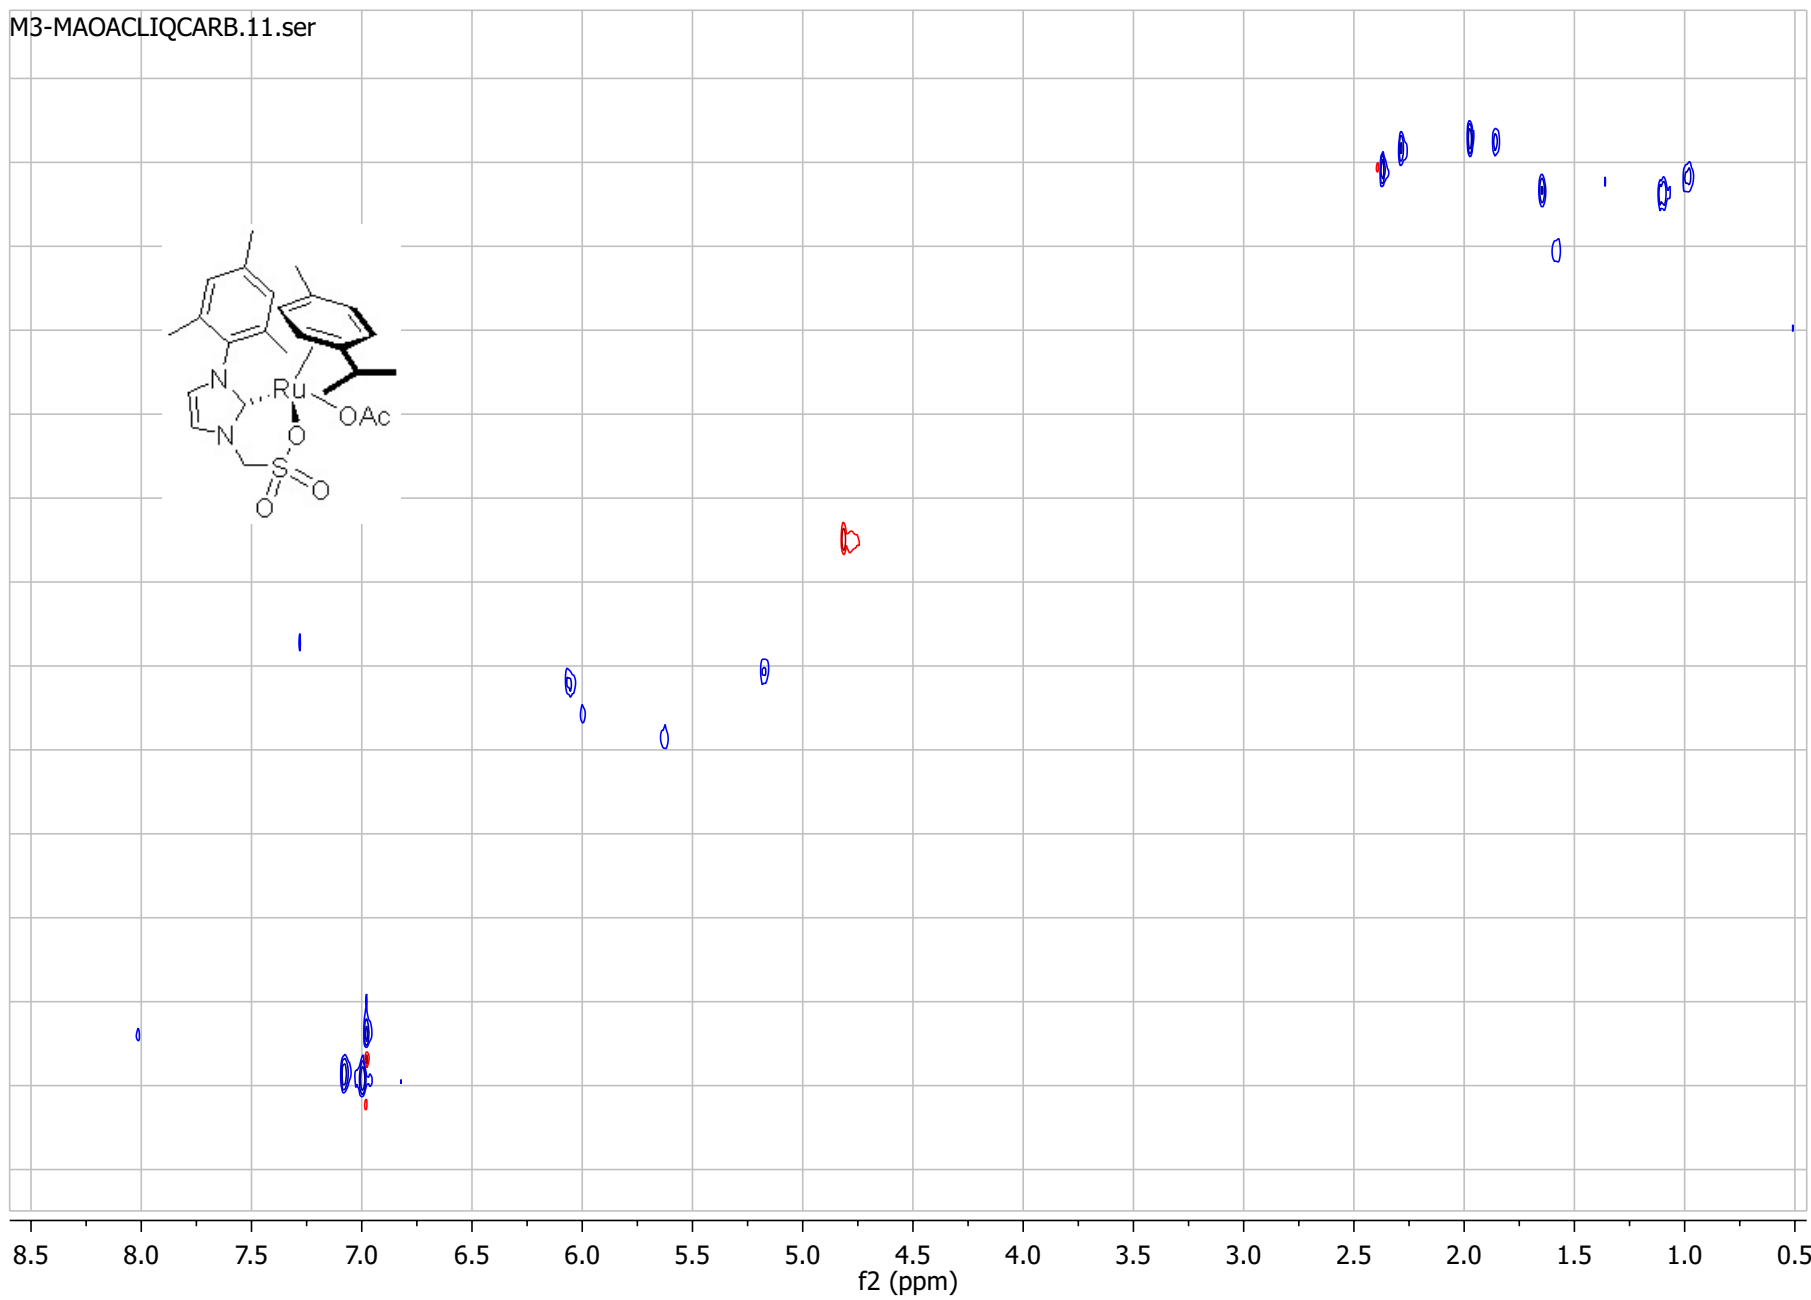

f1 (ppm)

f2 (ppm)

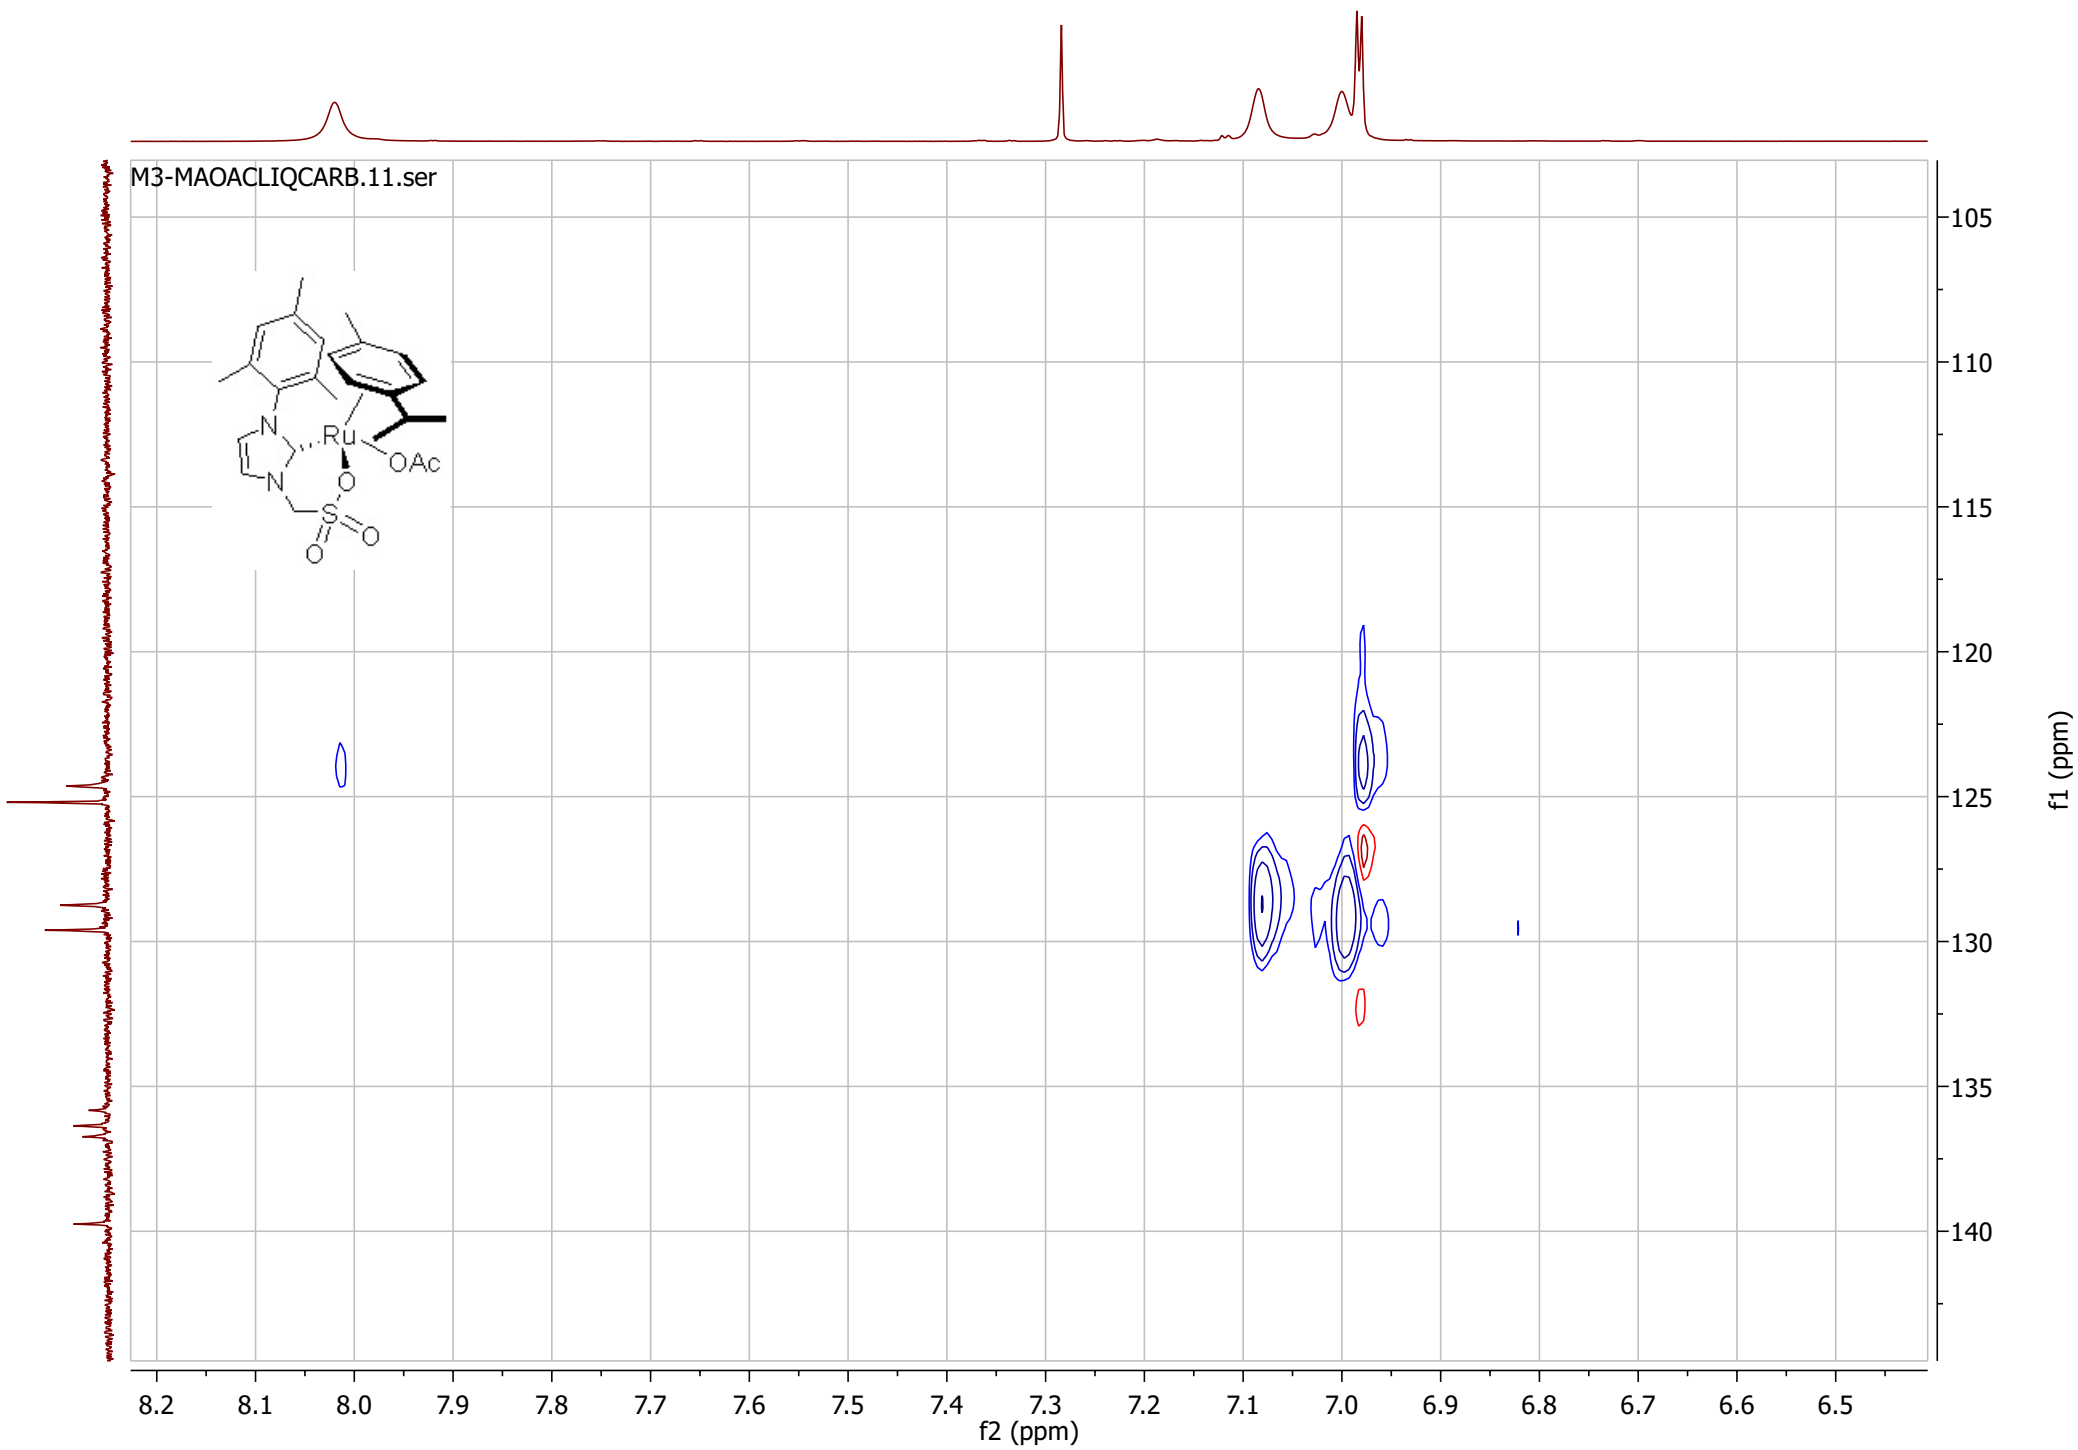

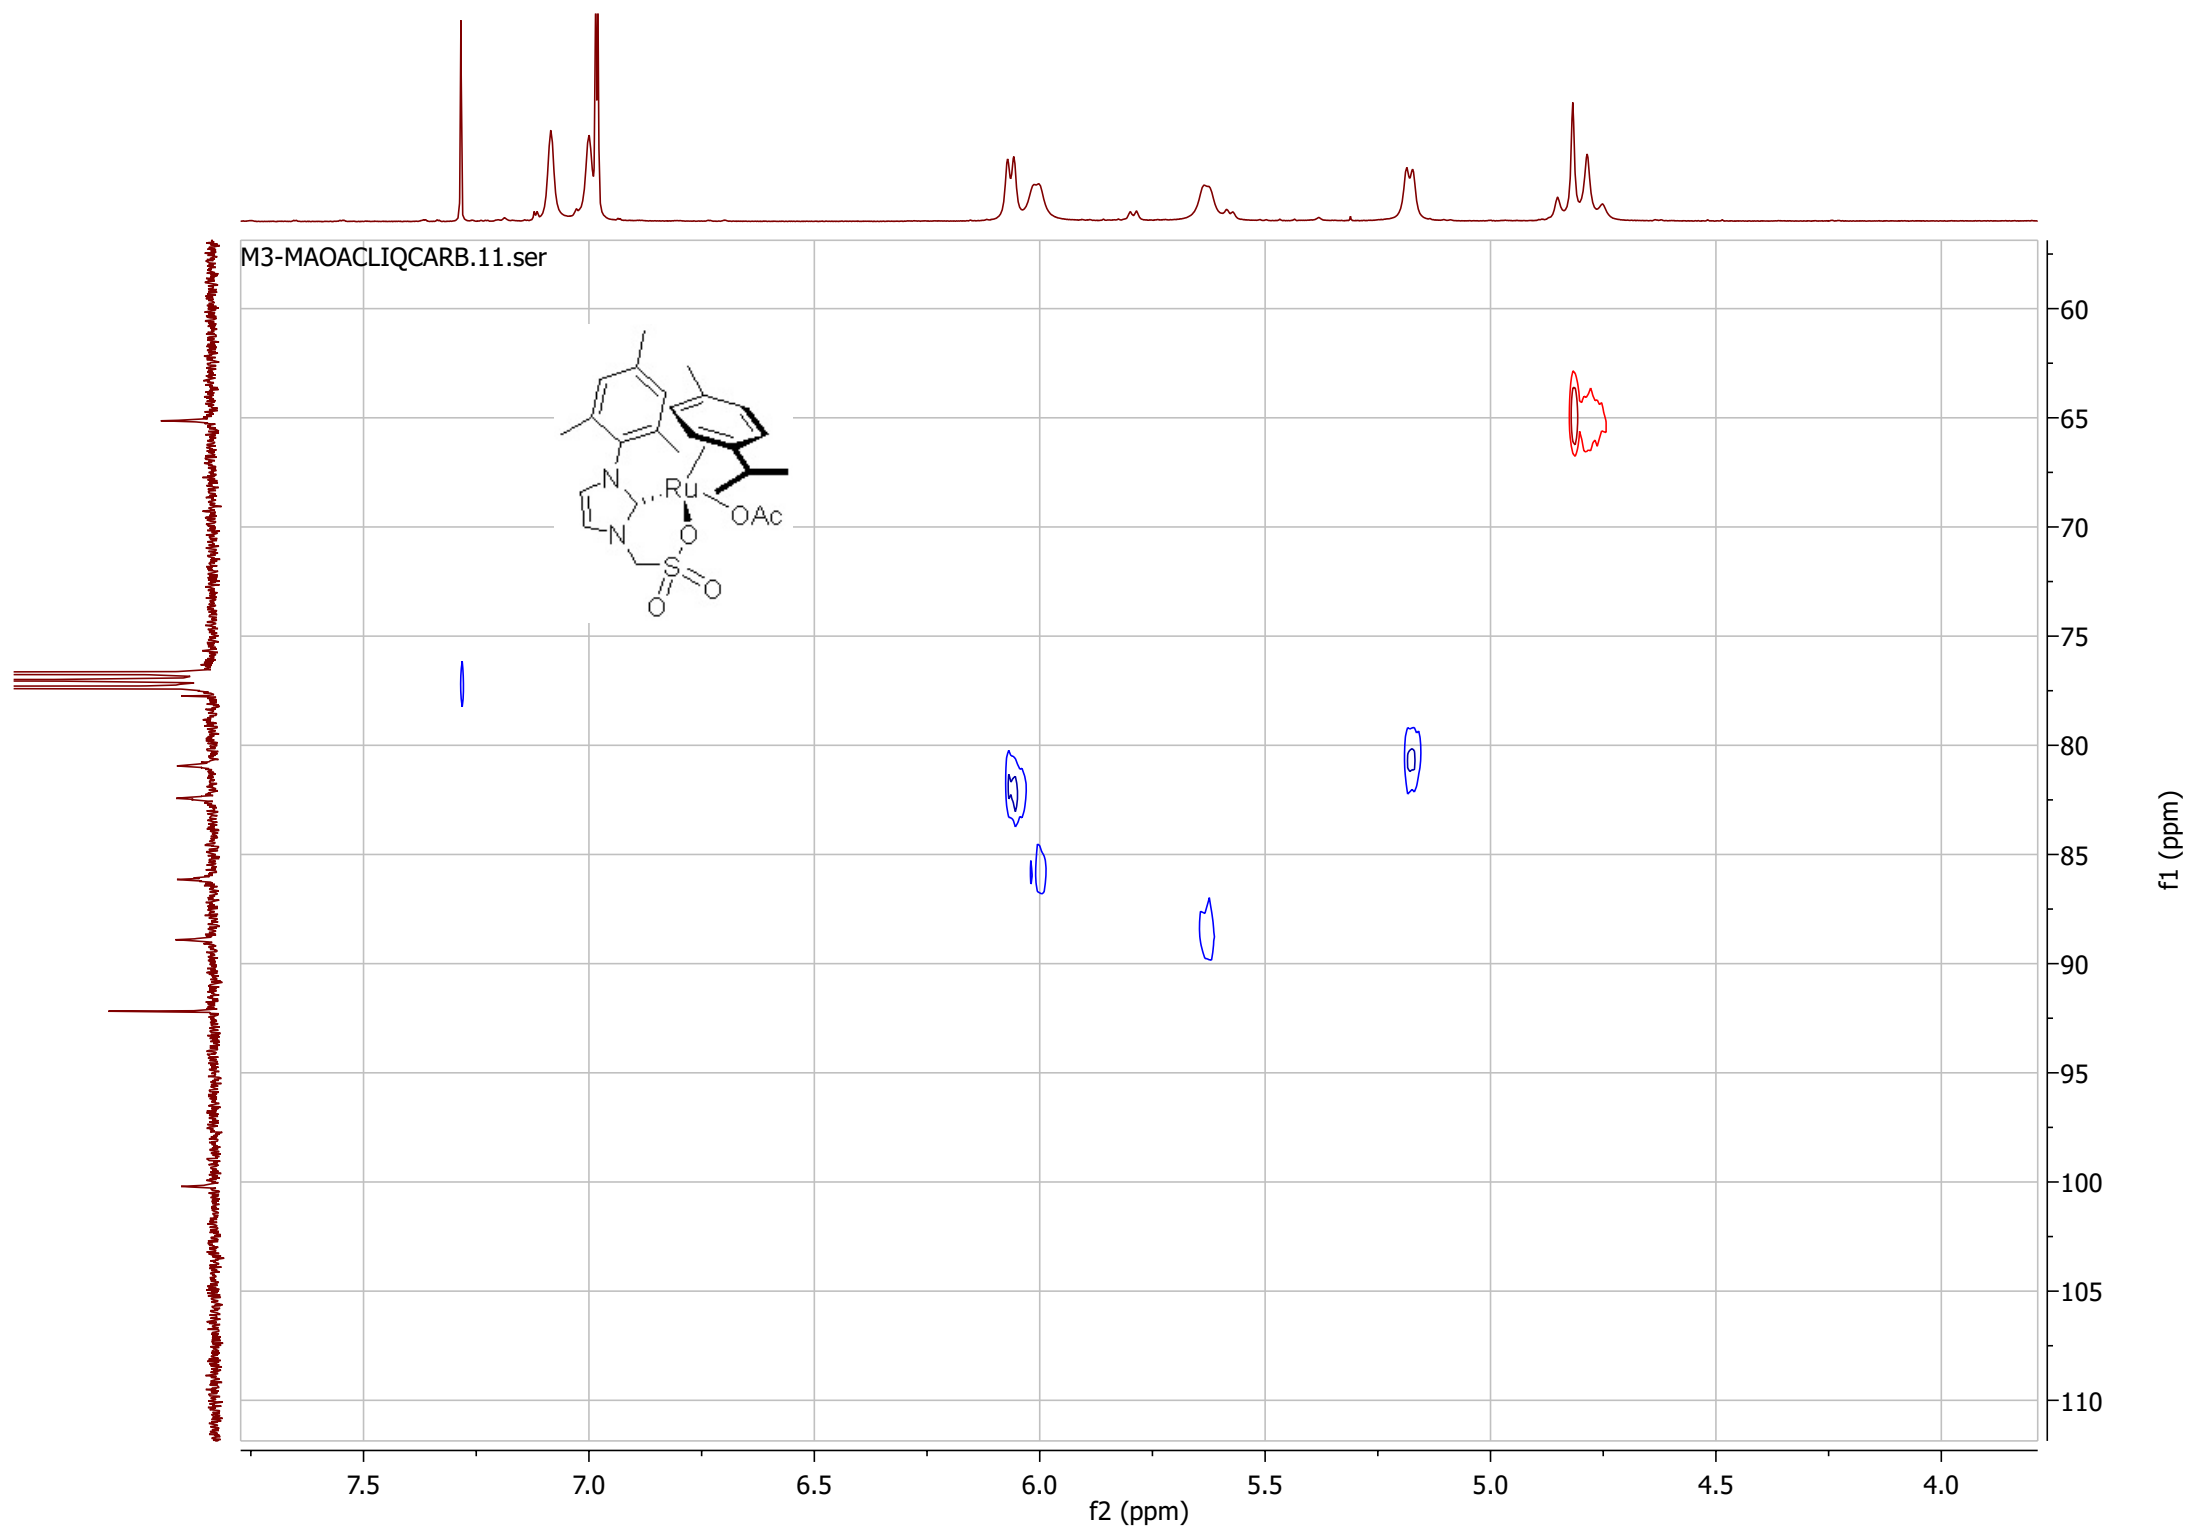

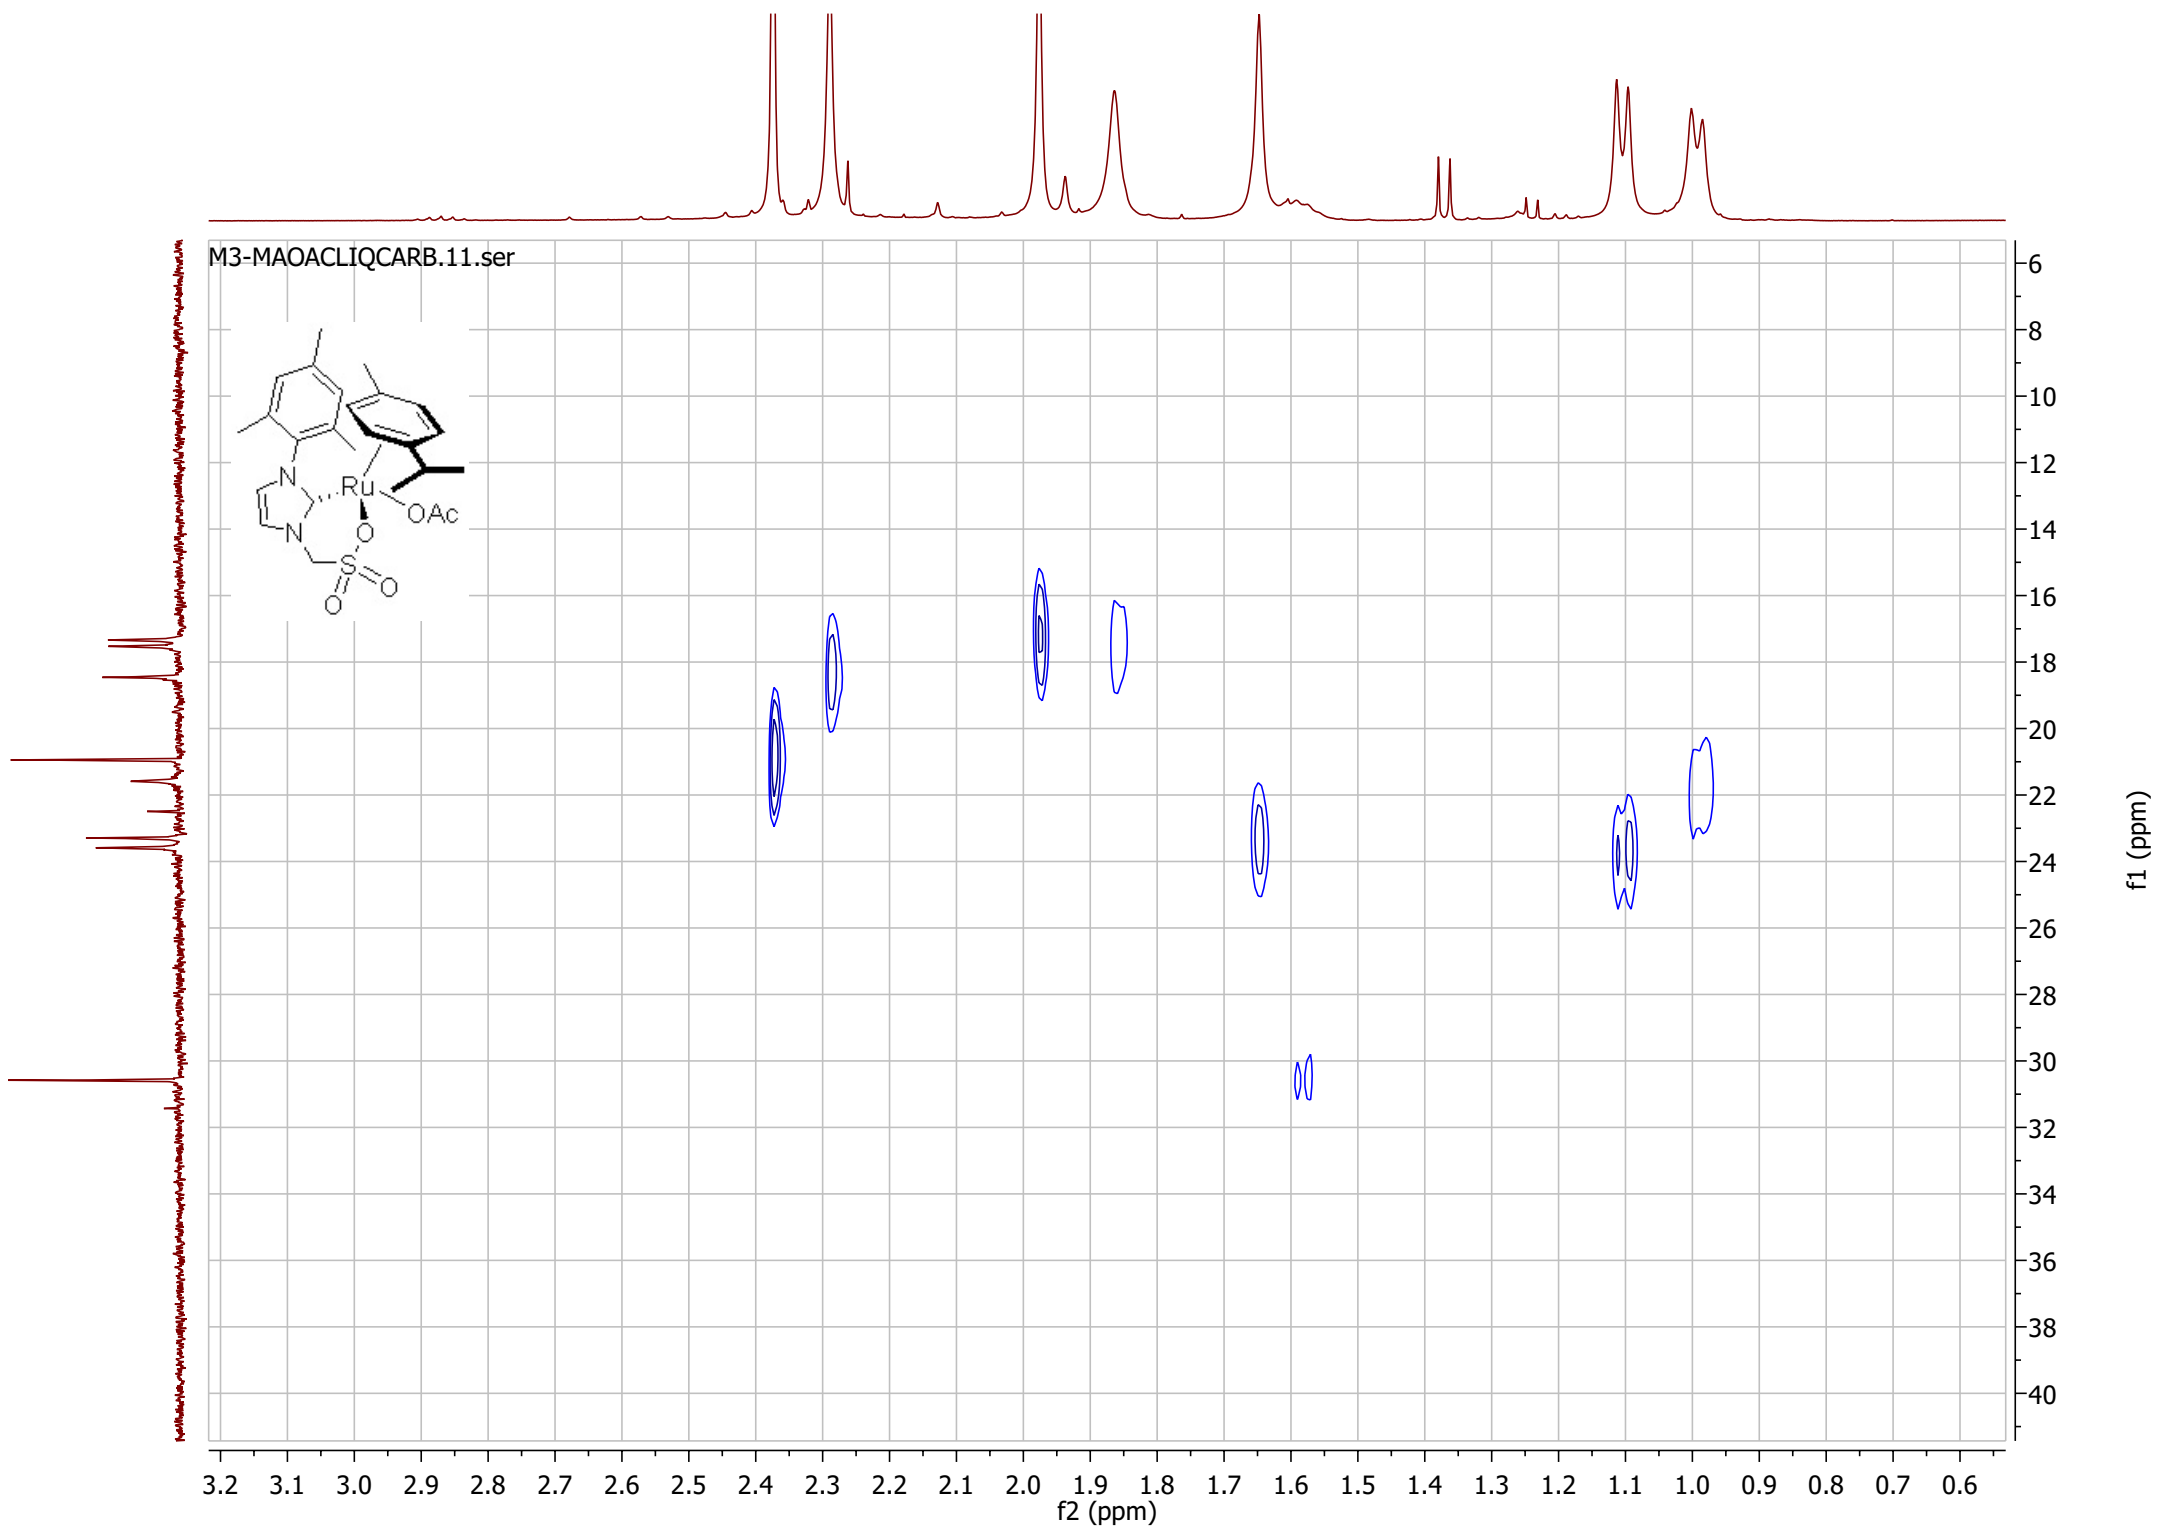

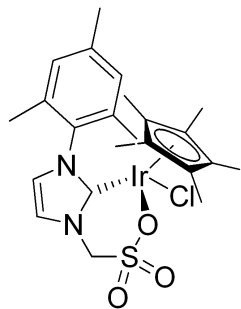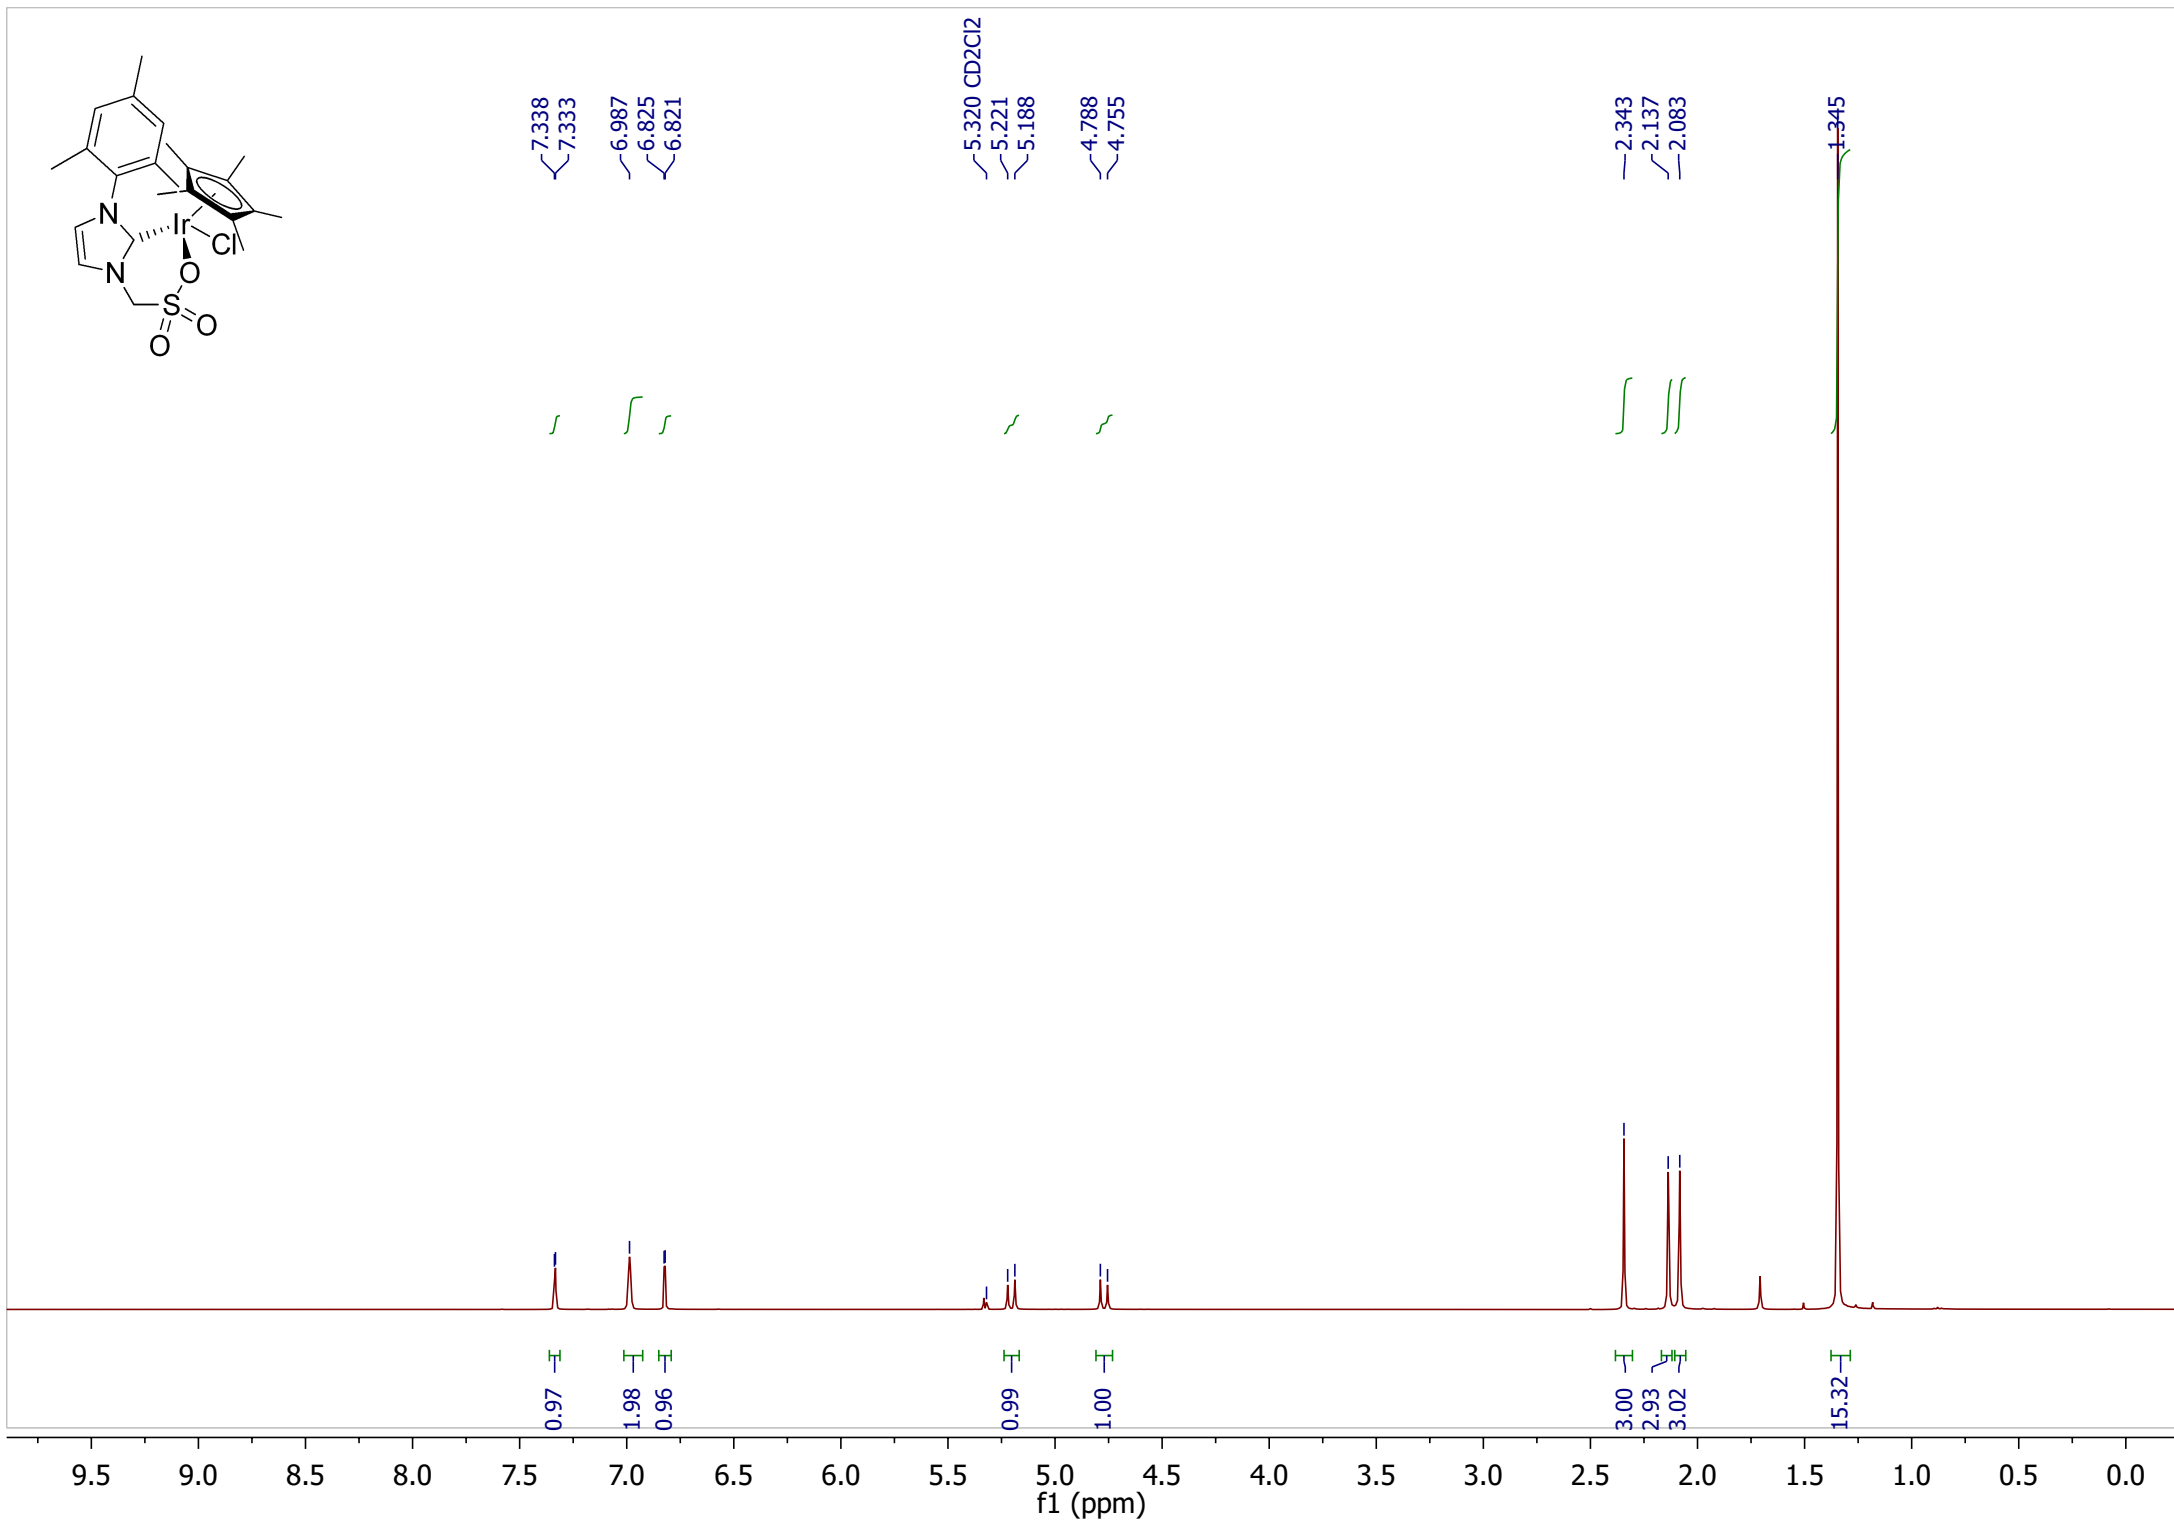



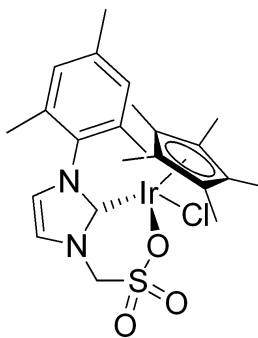

—161.50

—140.34

—138.45

—136.24

—135.43

—130.11

—129.04

—125.09

—125.00

—90.93

—64.76

—54.00 CD2Cl2

—21.33

—19.80

—19.07

—9.67

190 180 170 160 150 140 130 120 110 100 90 80 70 60 50 40 30 20 10 0

f1 (ppm)

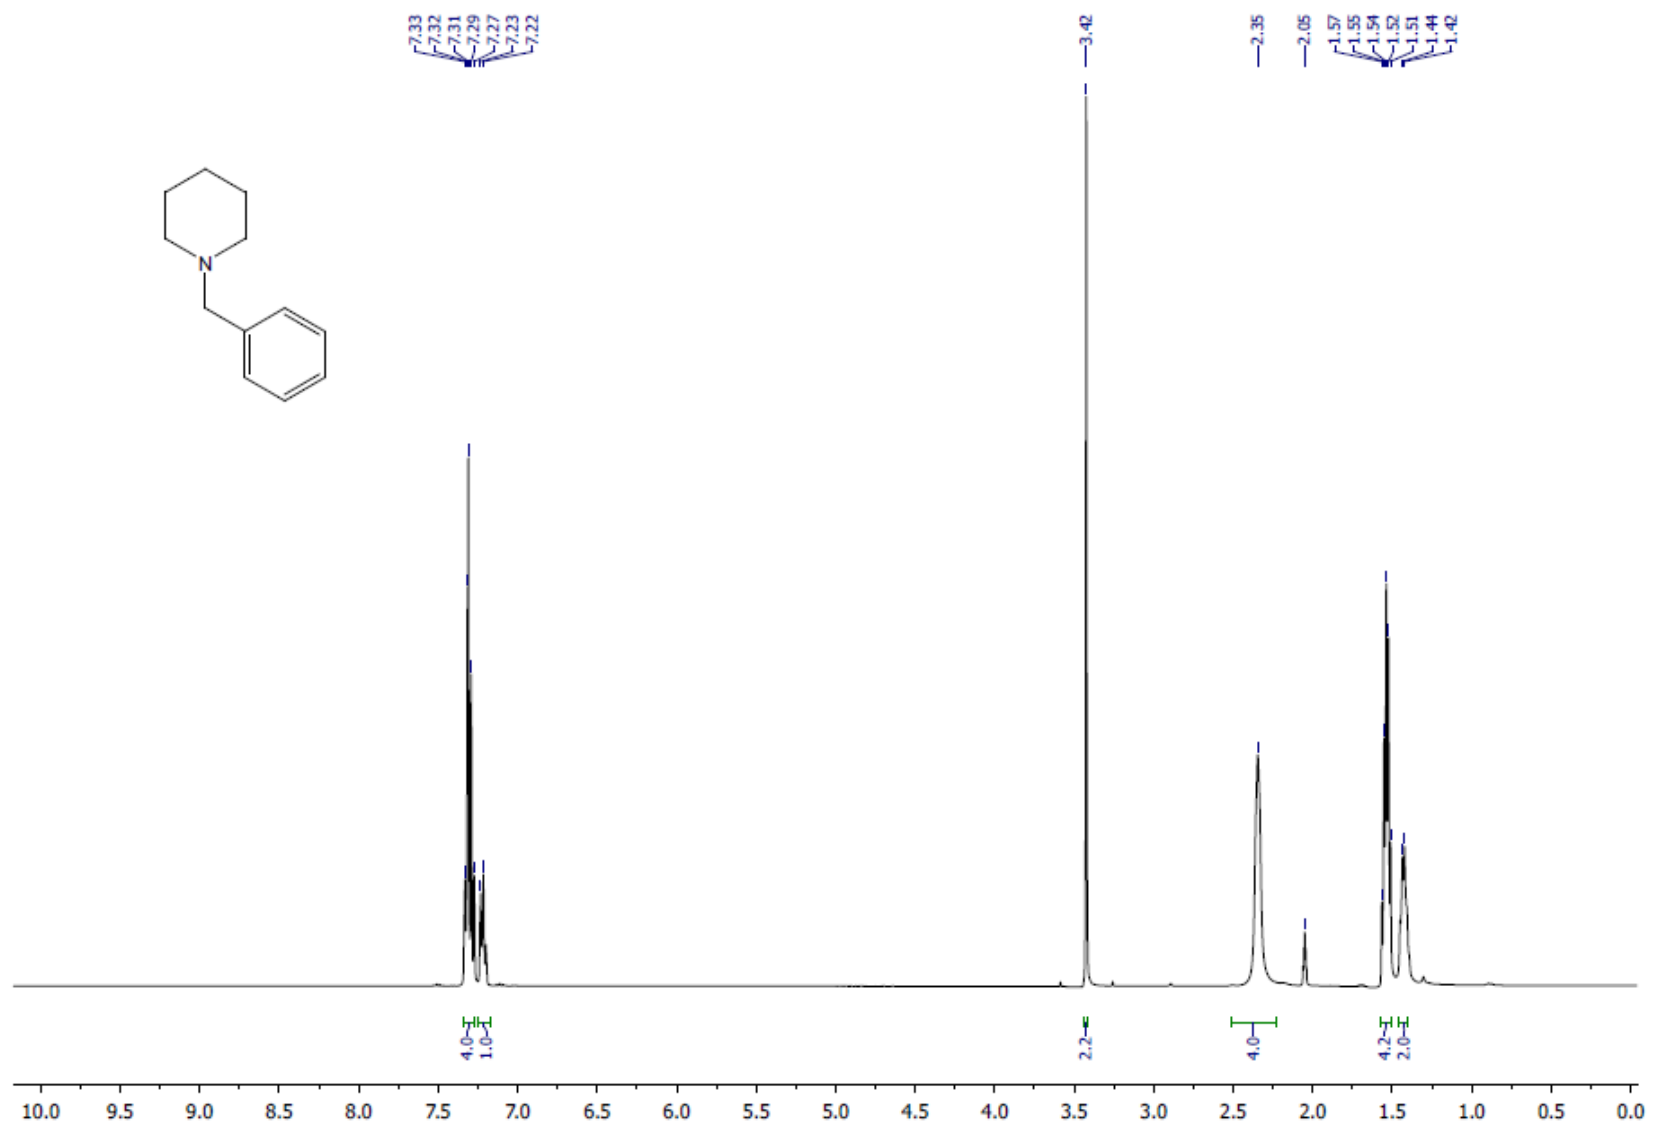

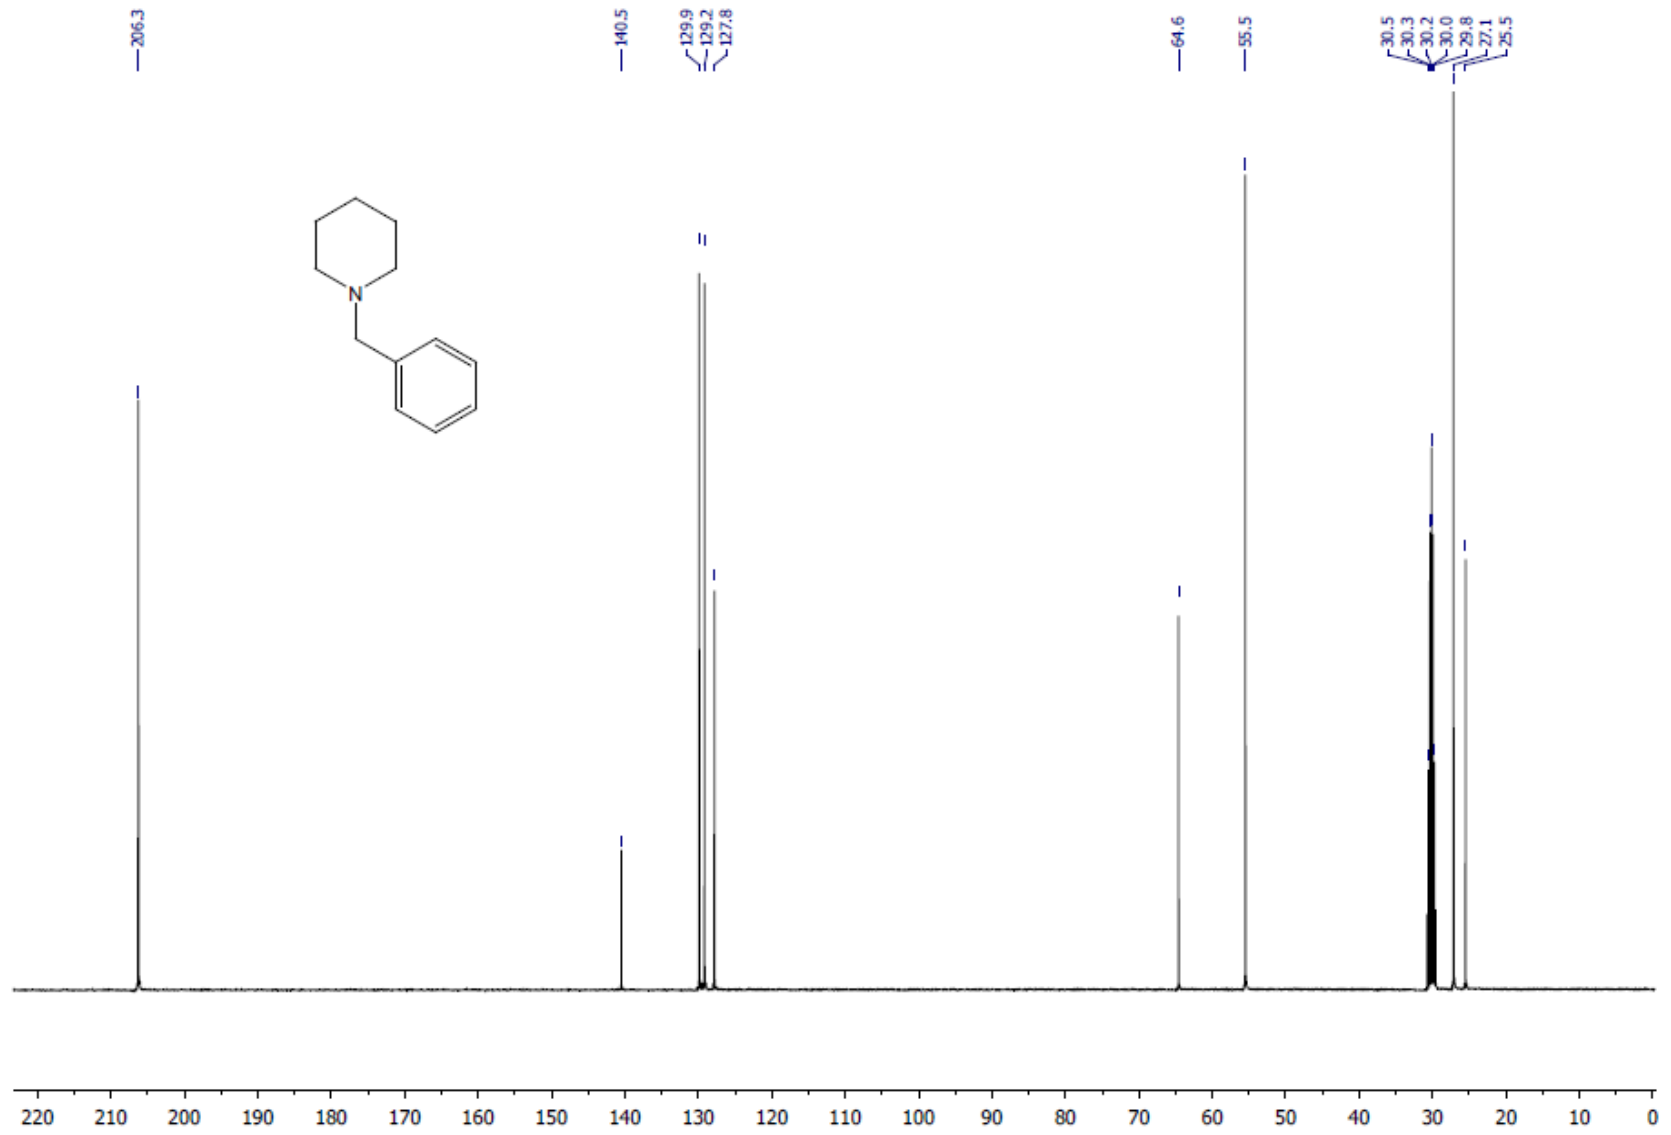

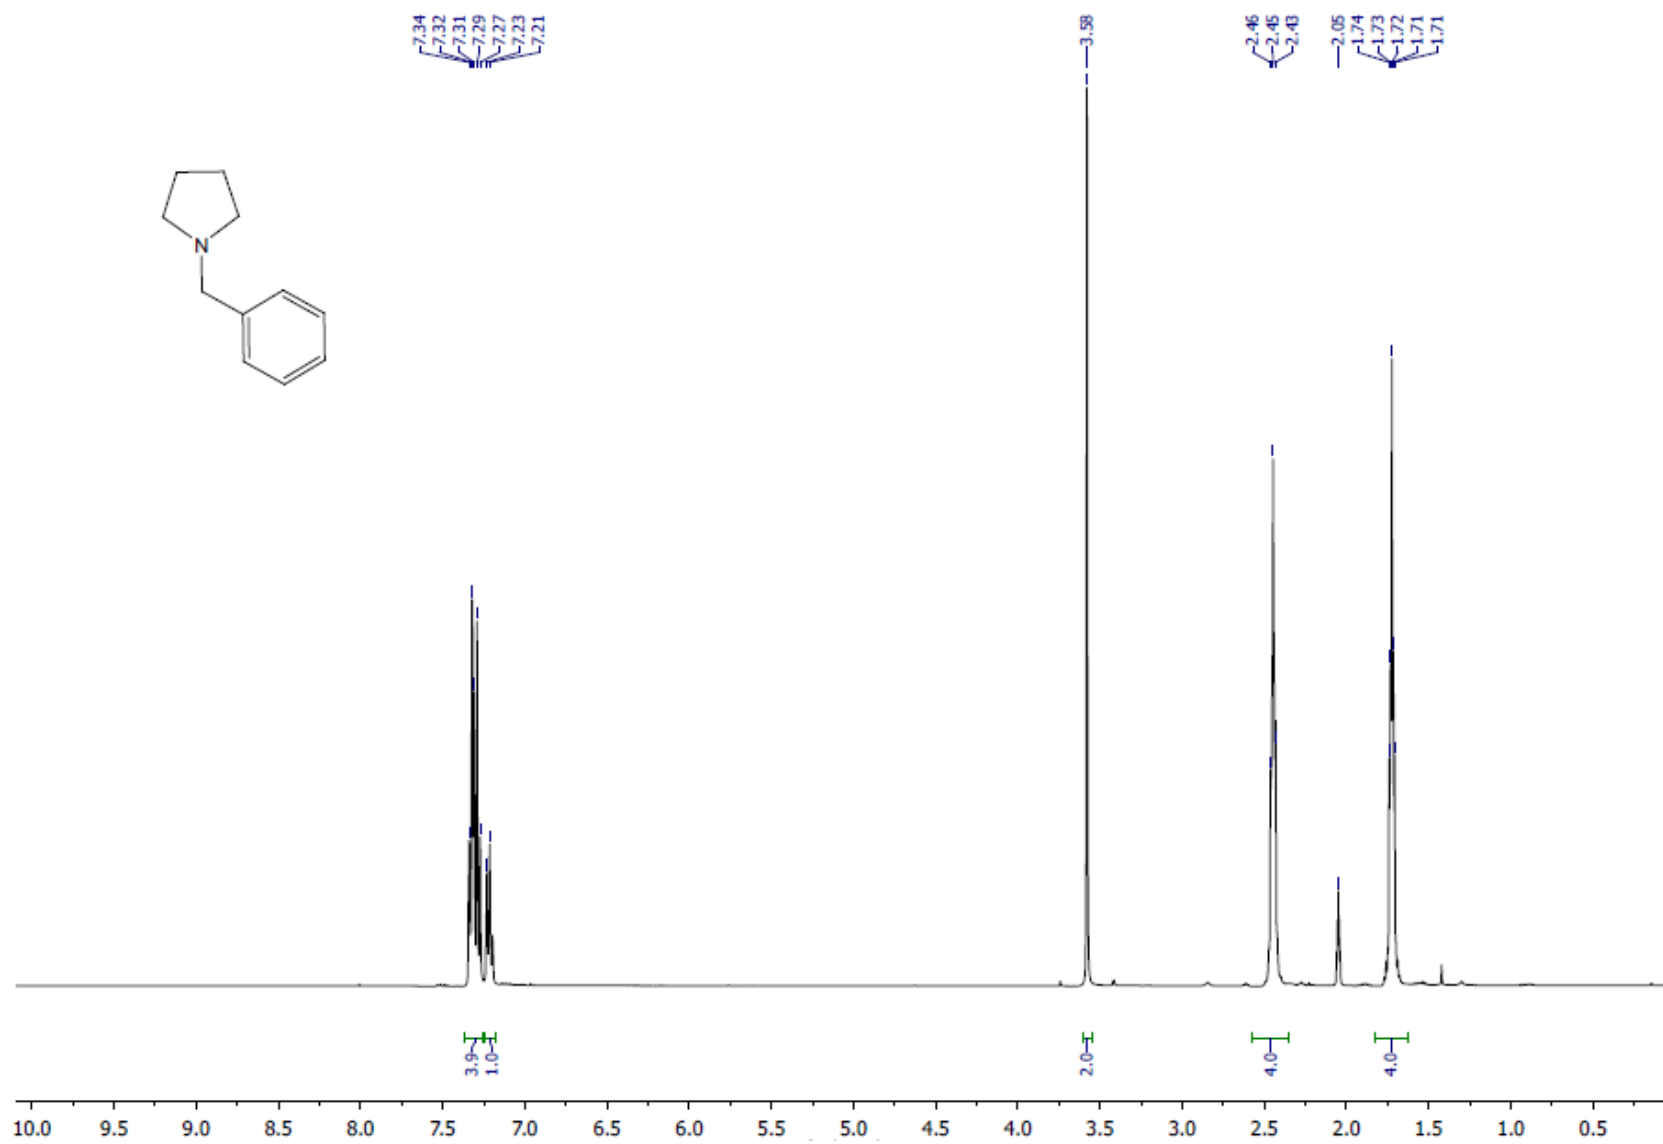

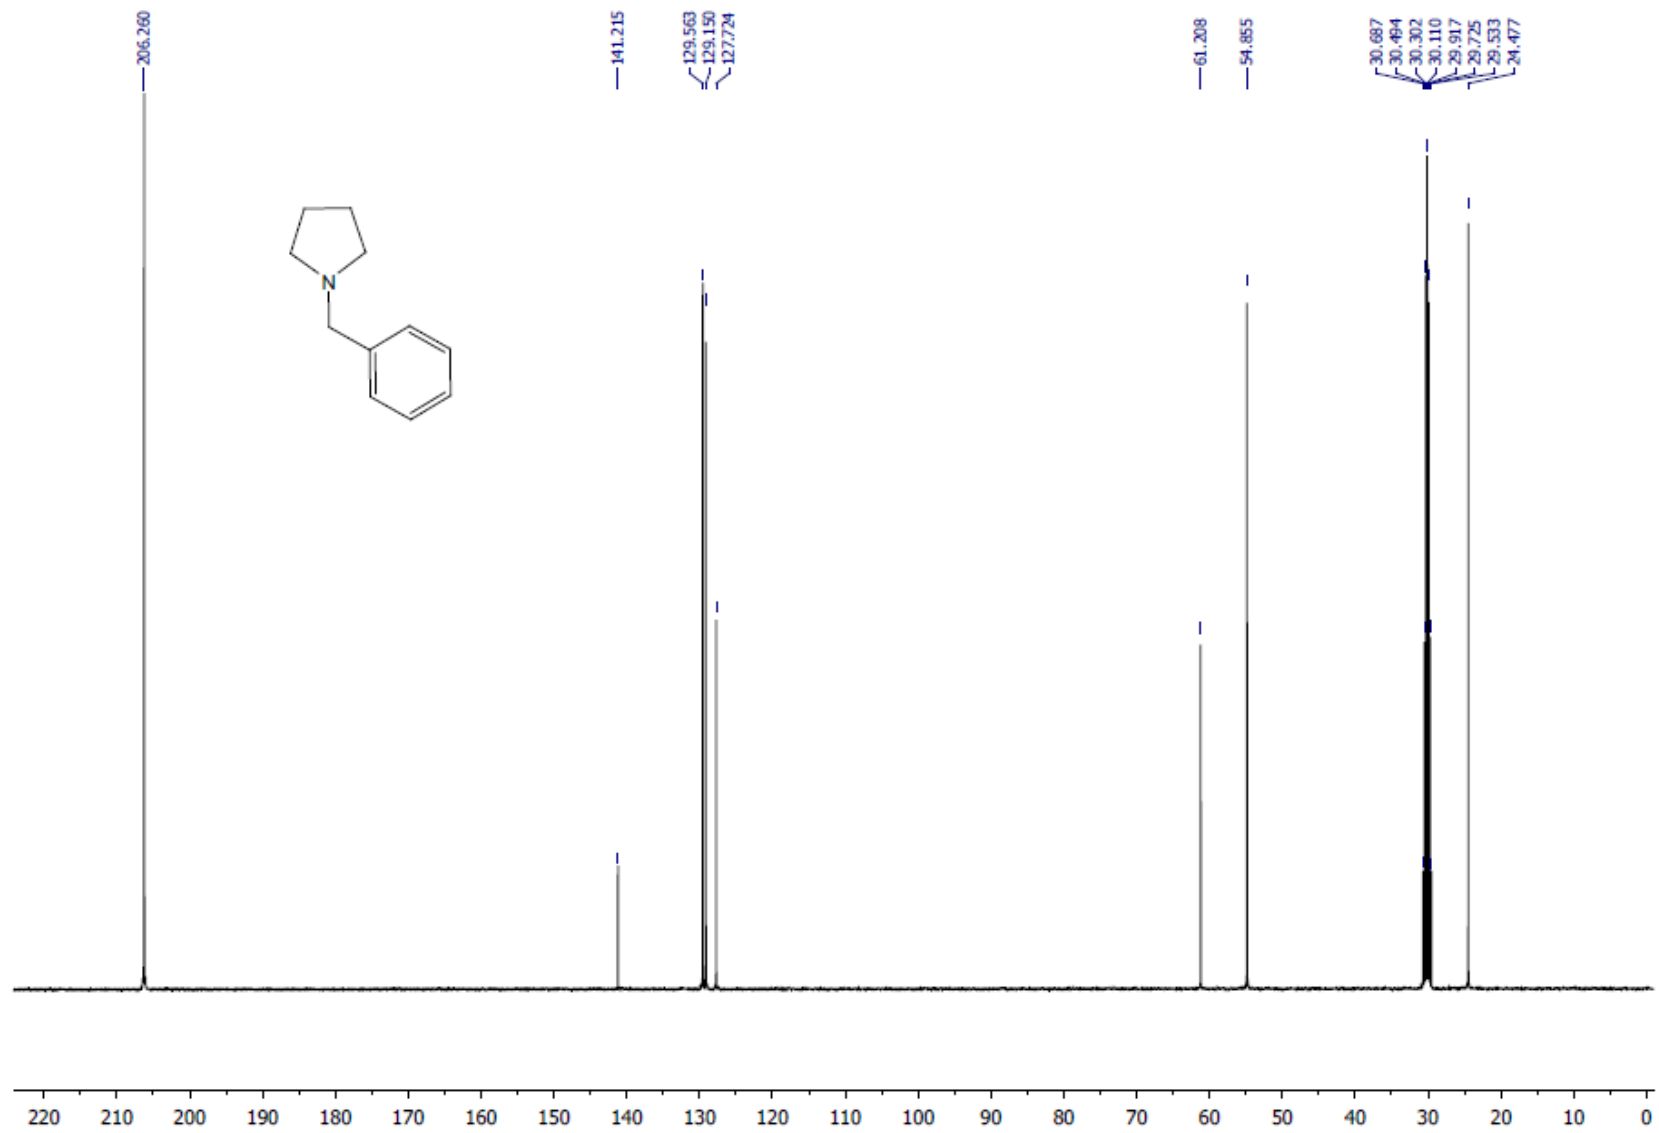

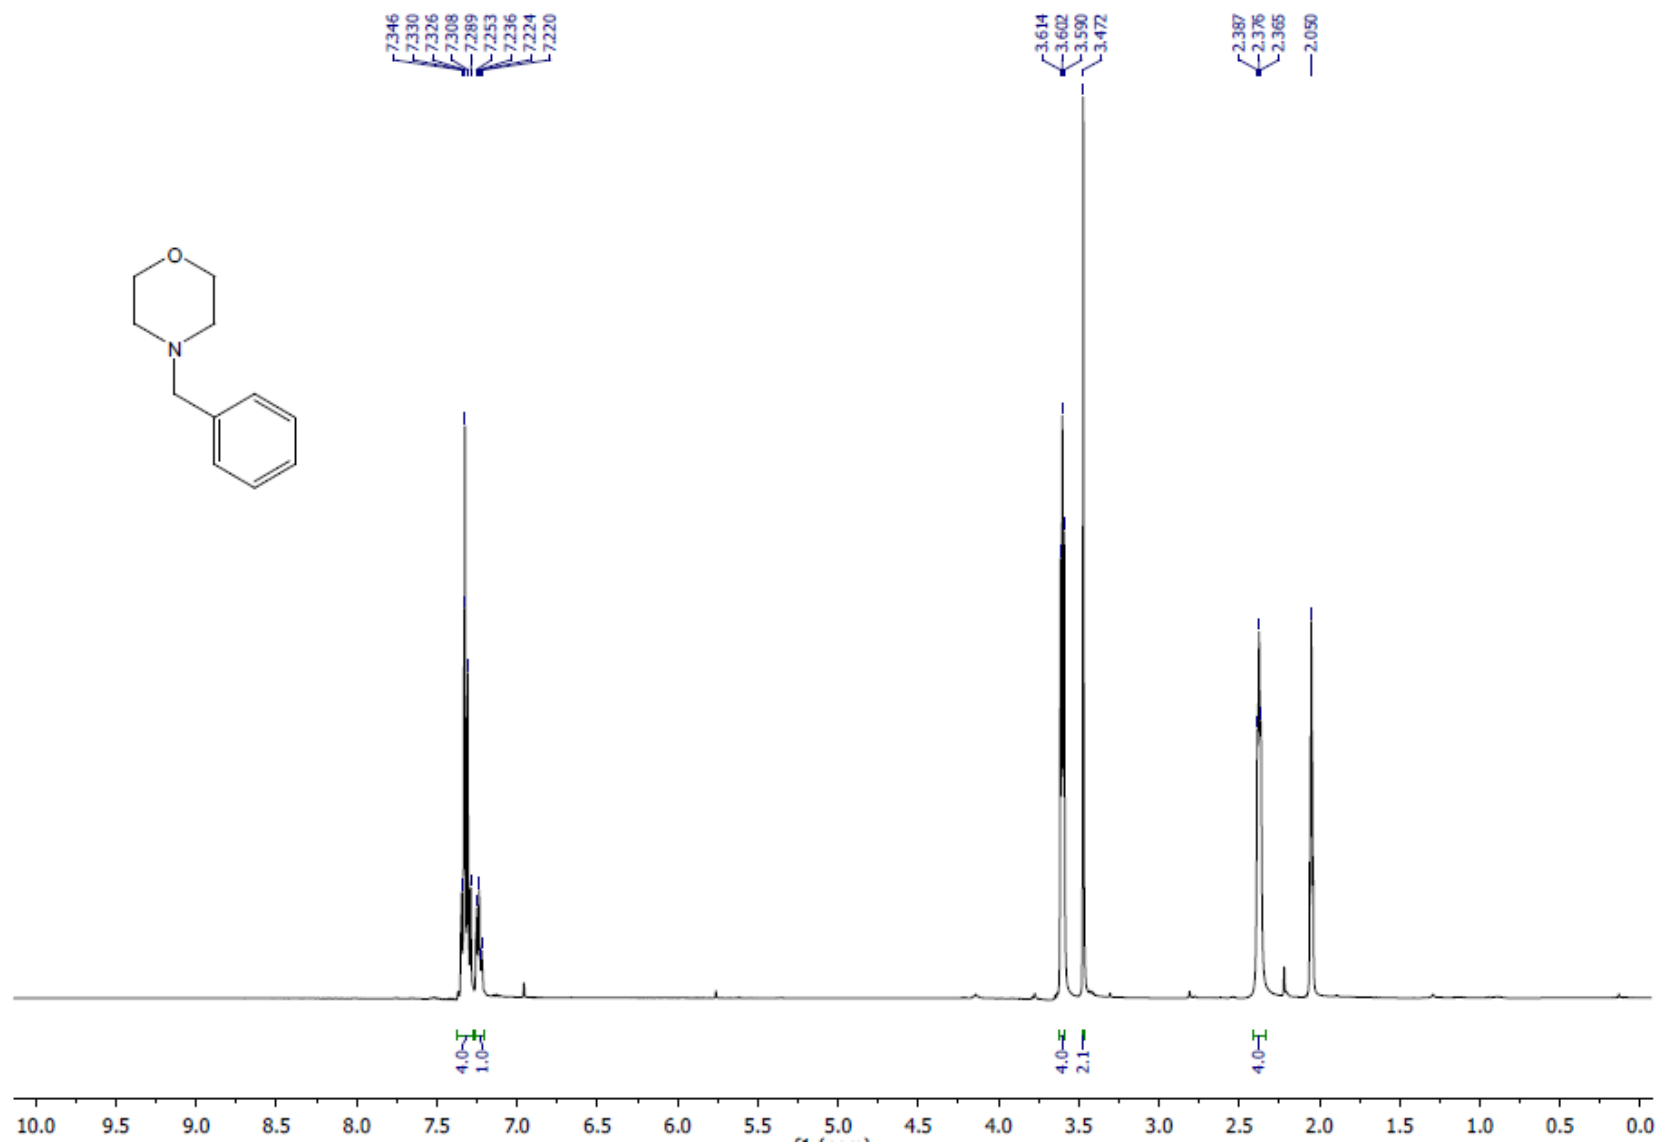

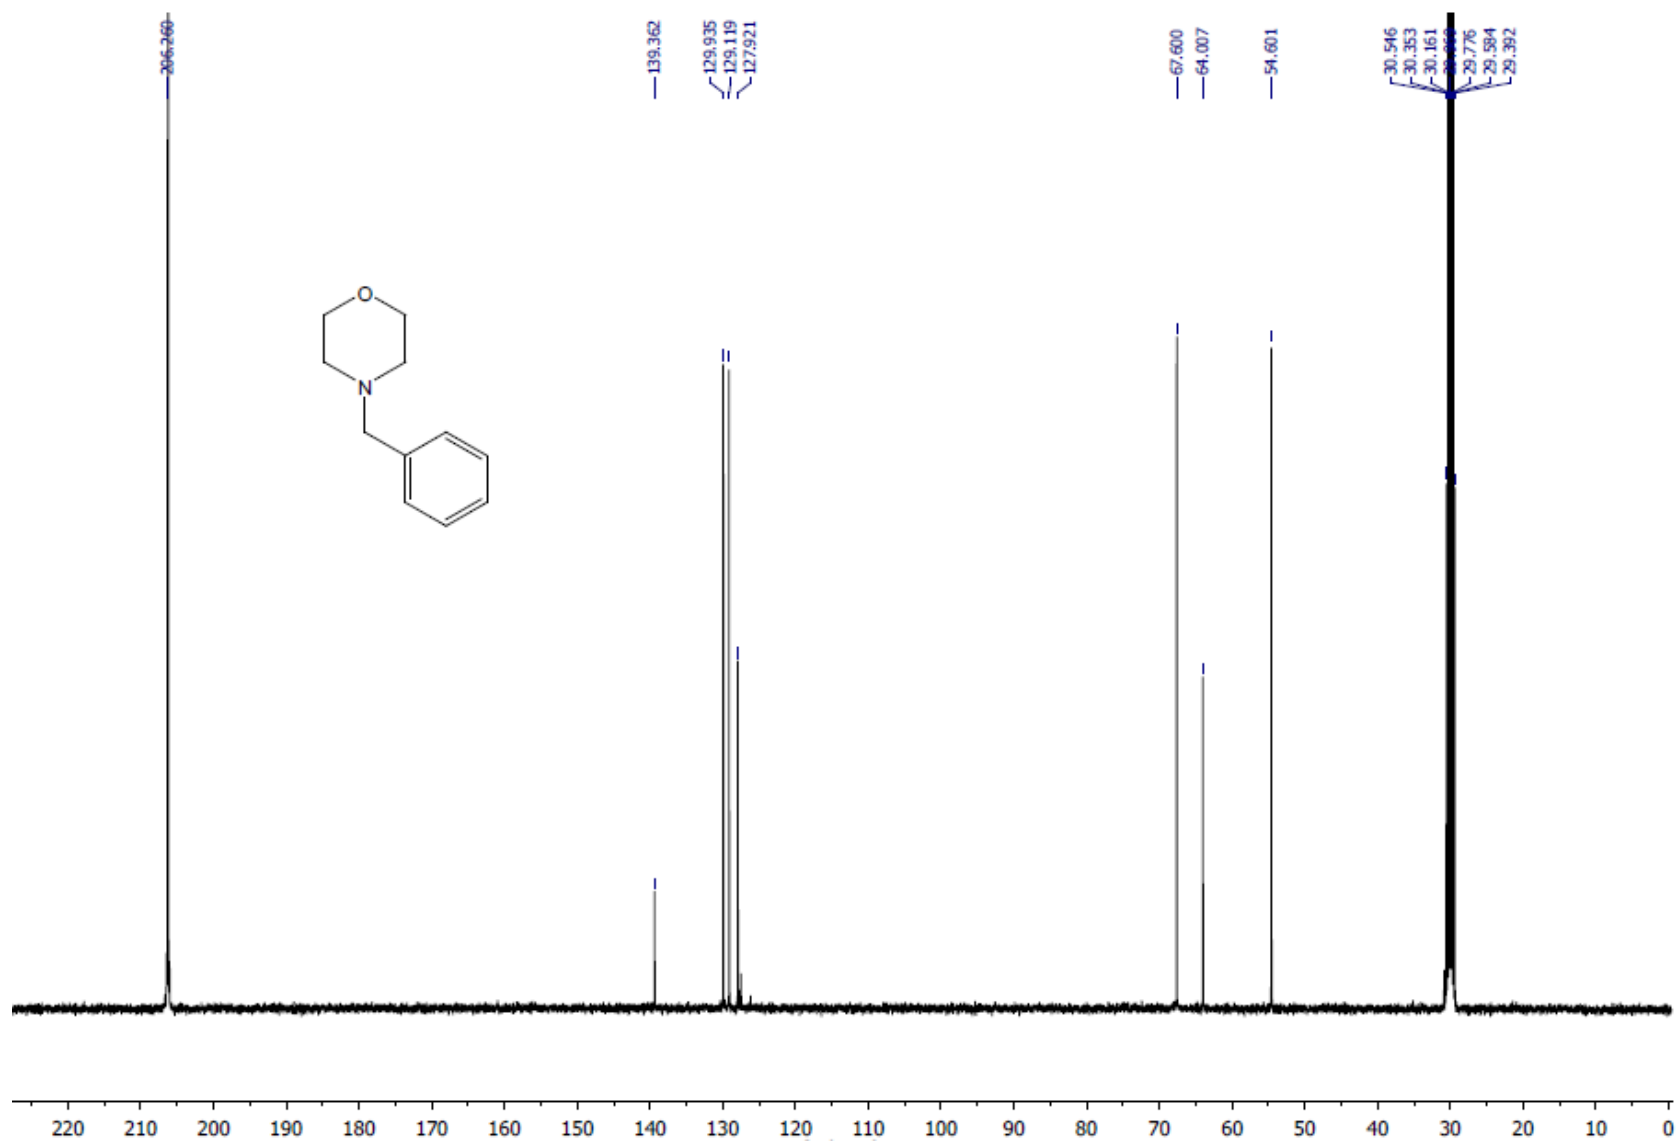

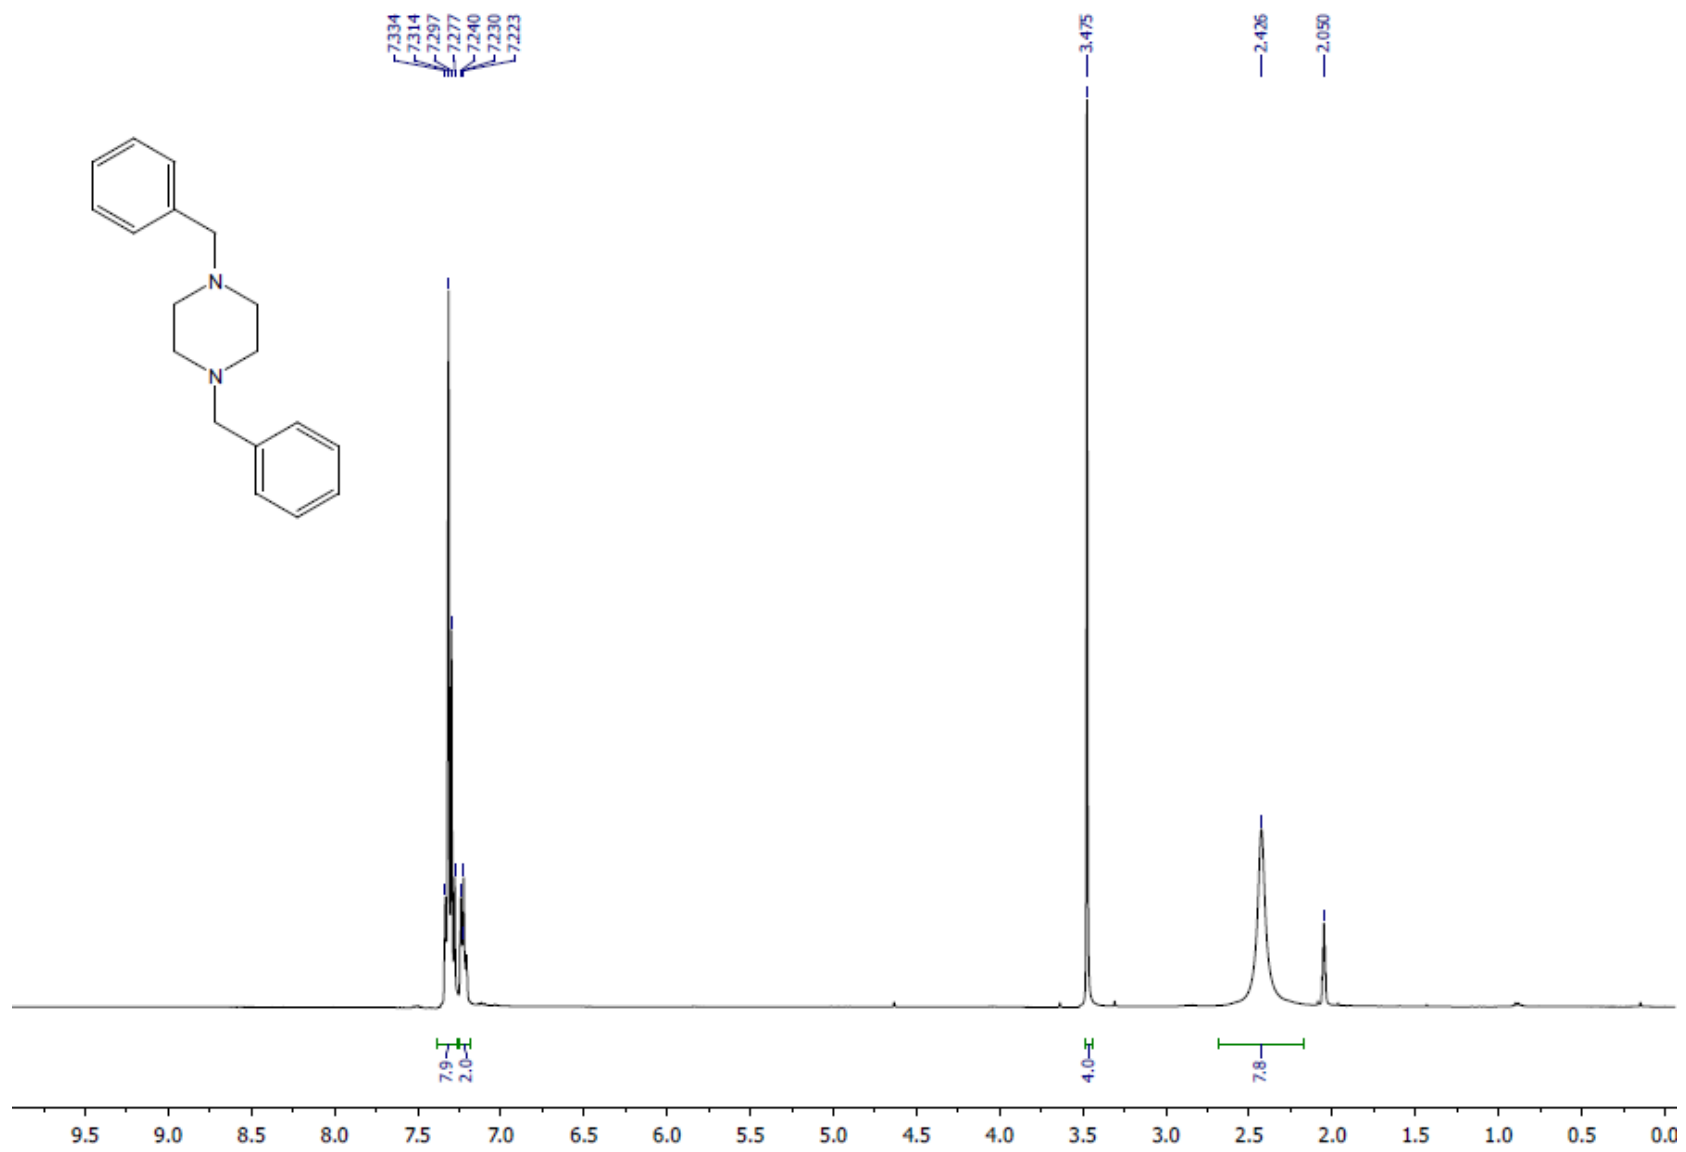



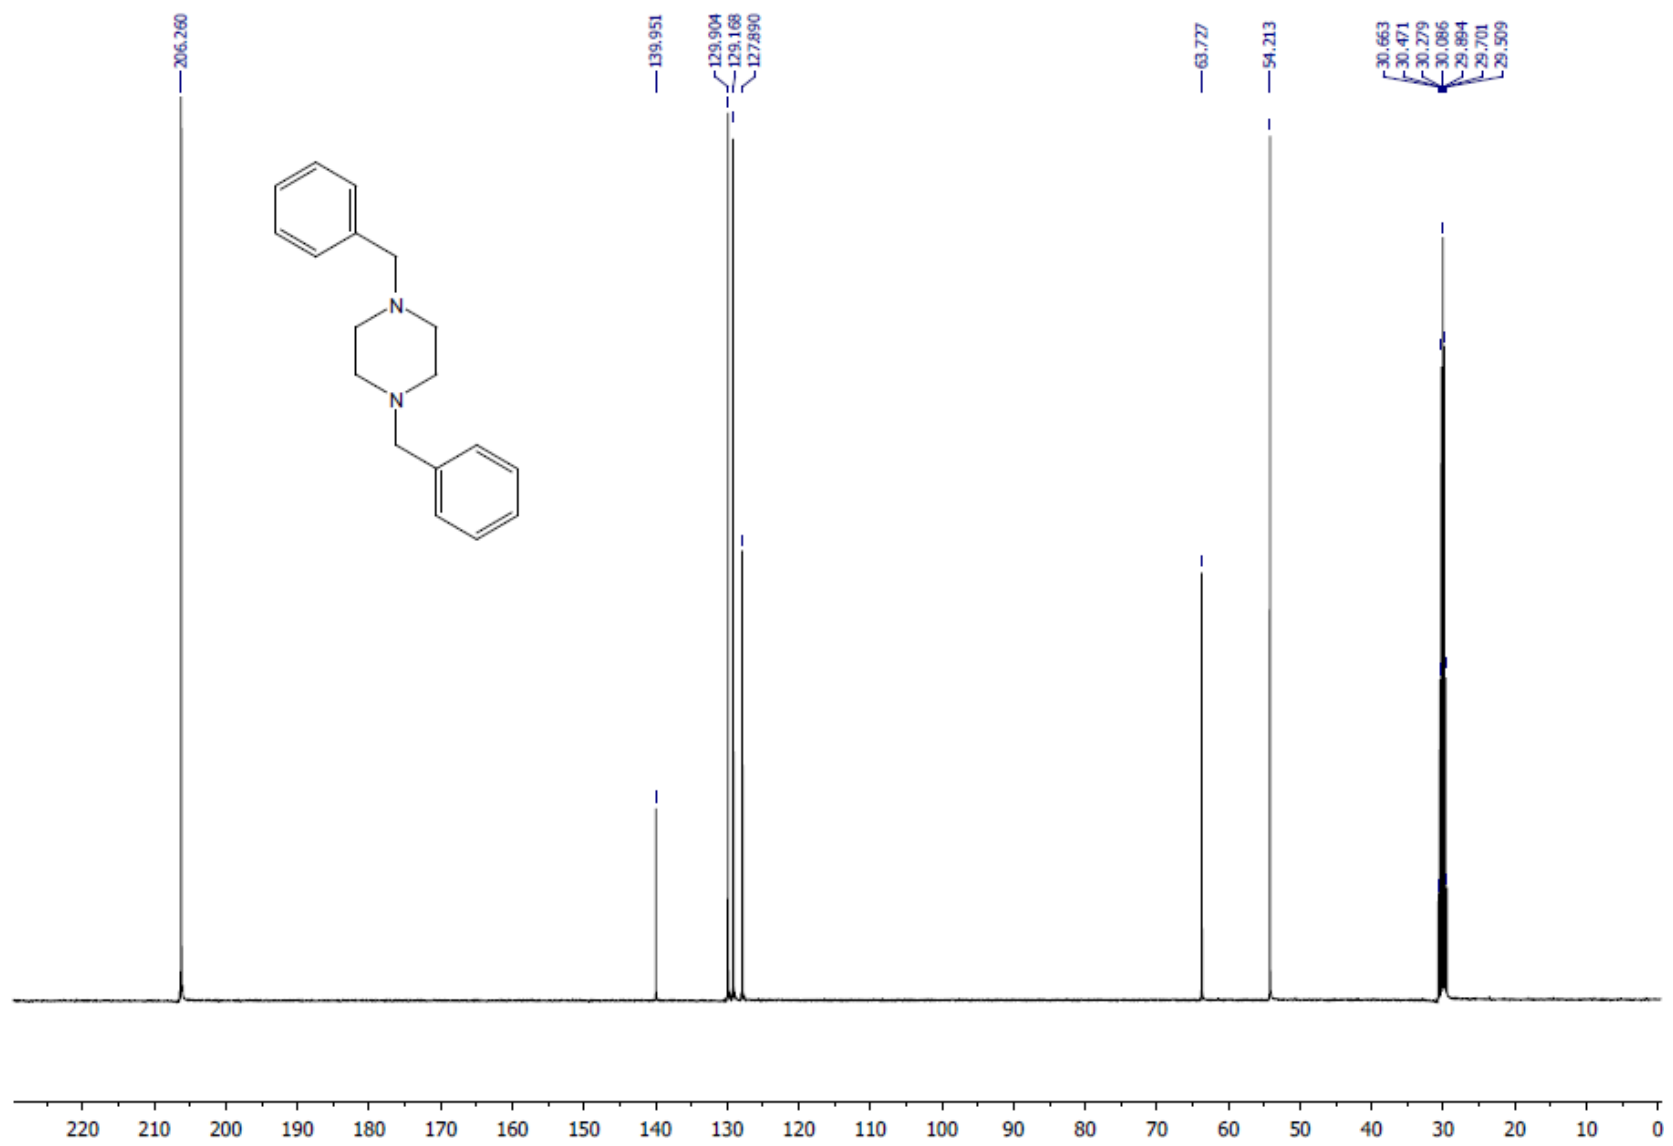

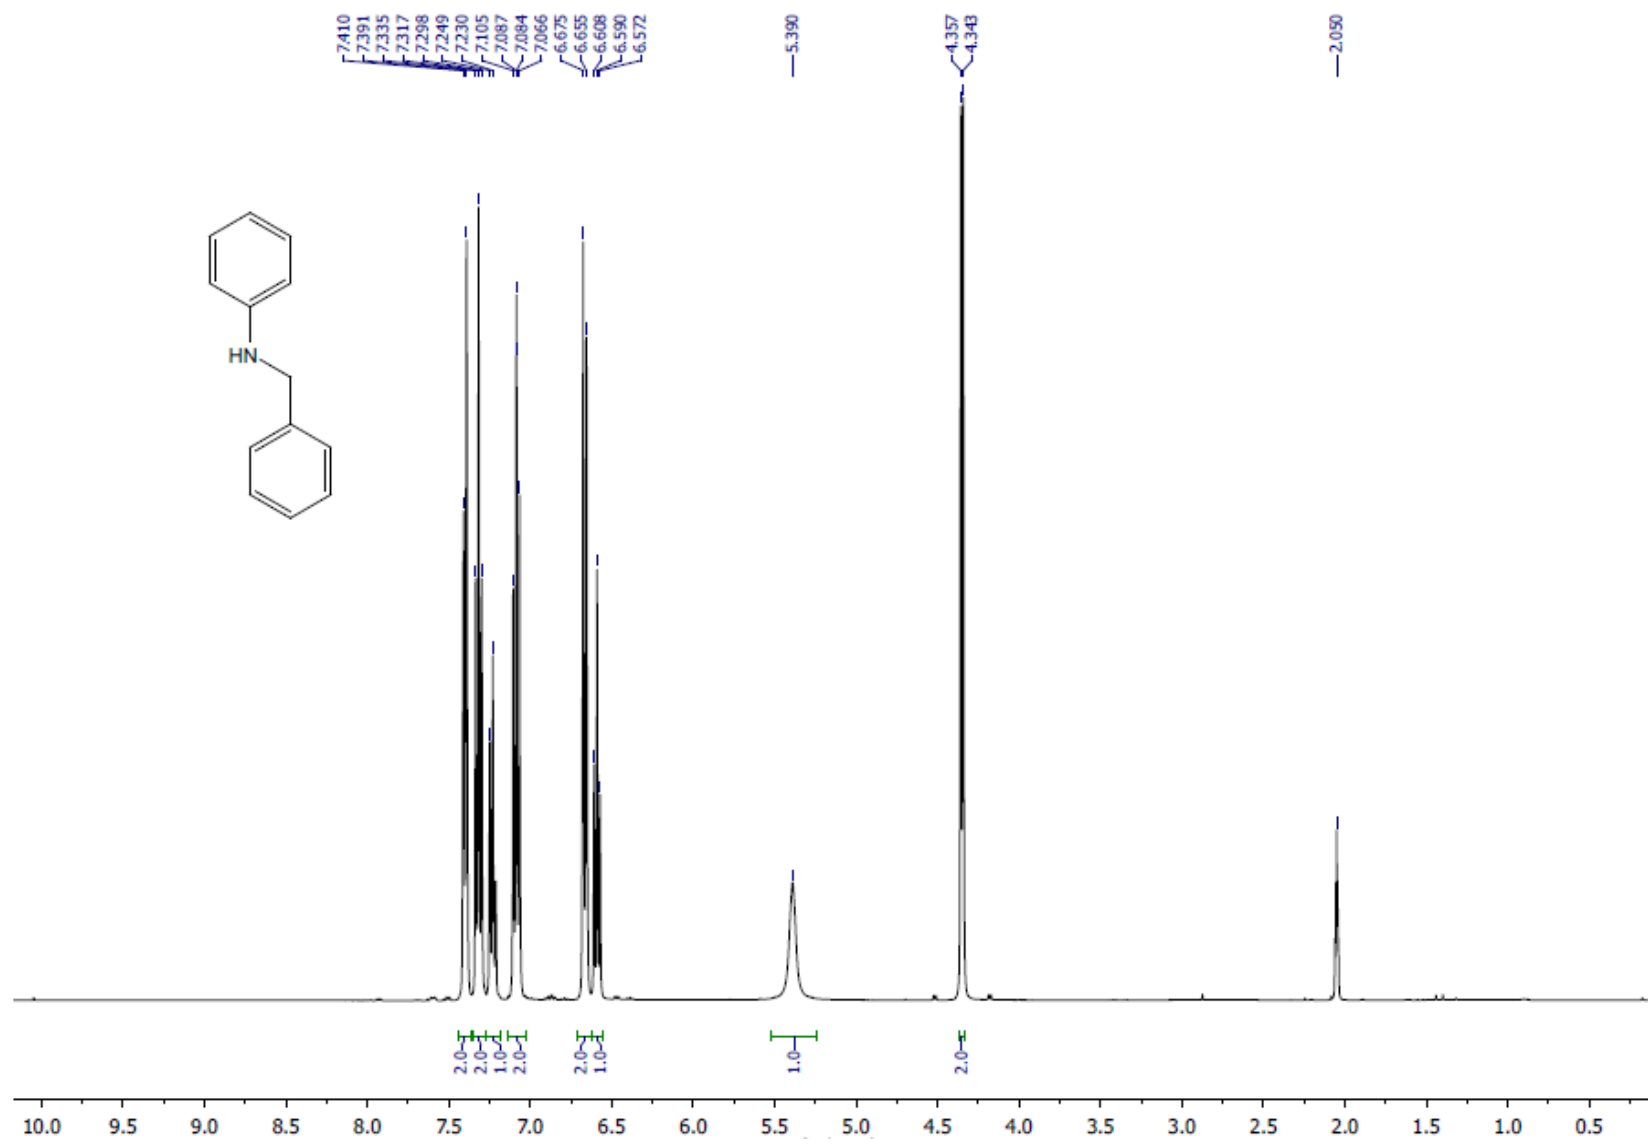

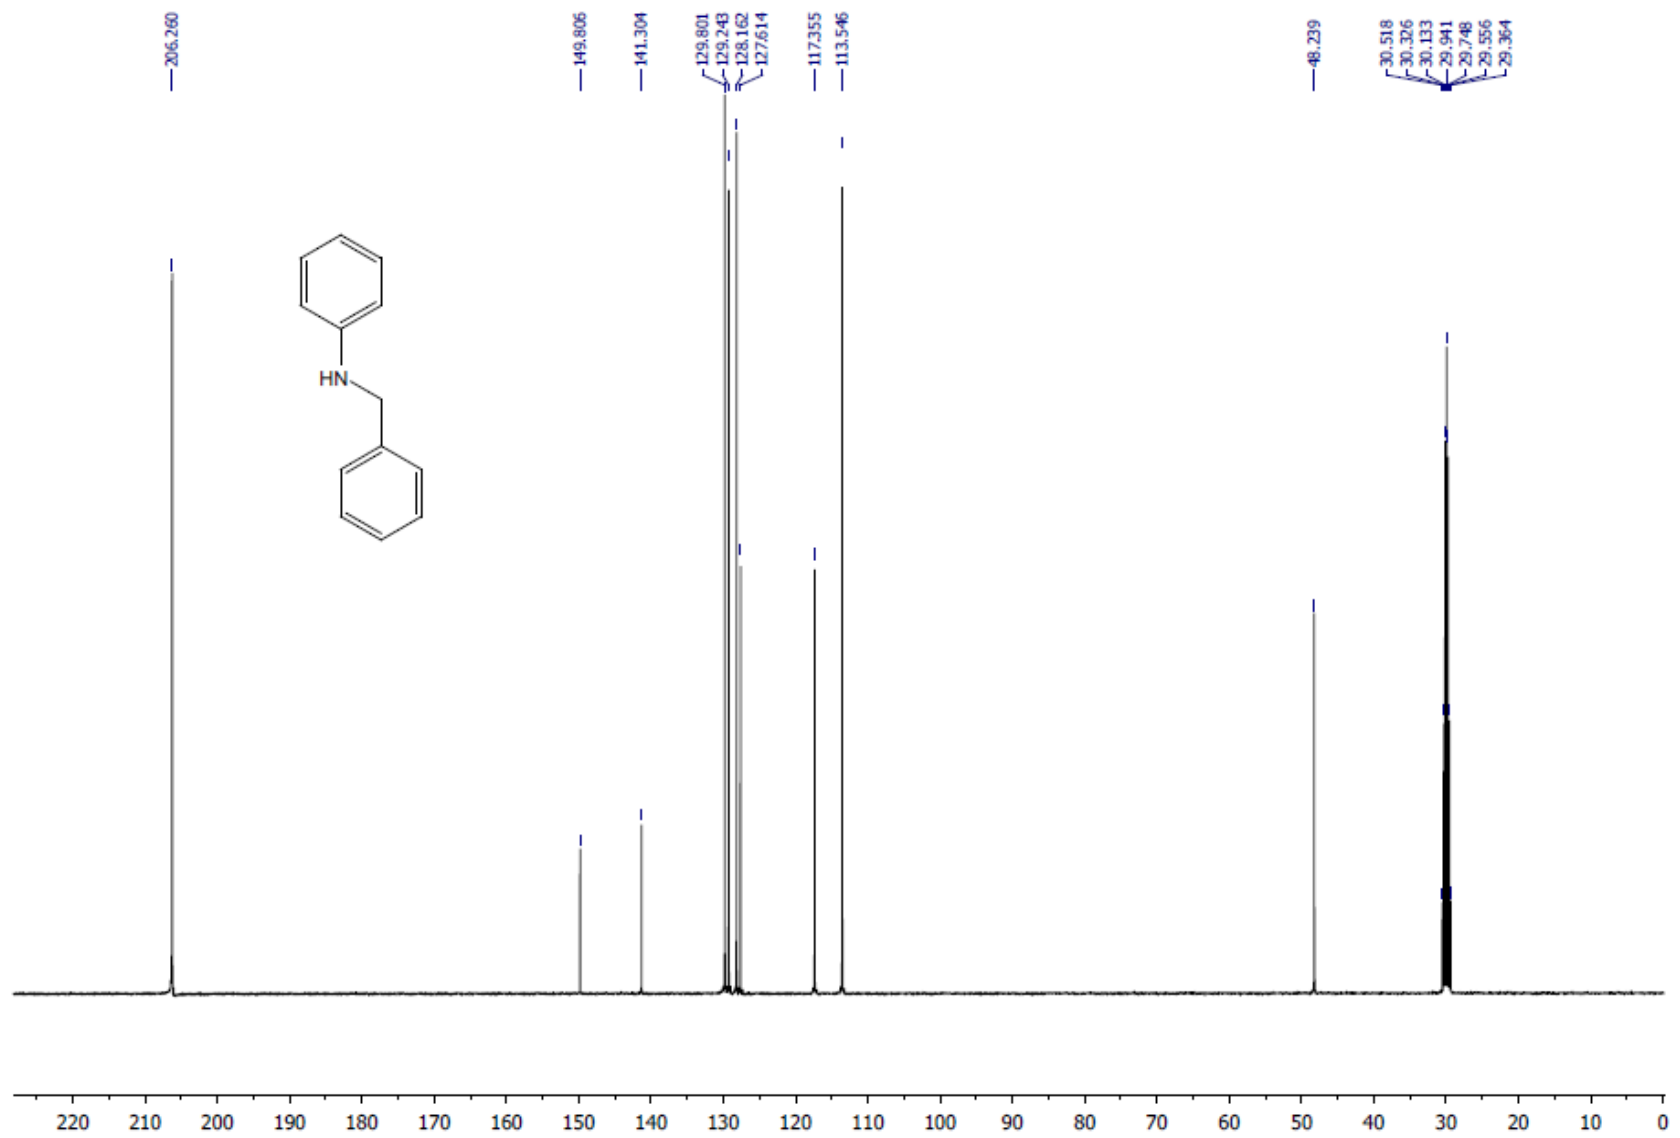

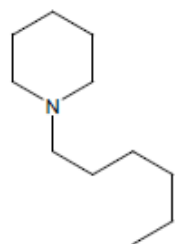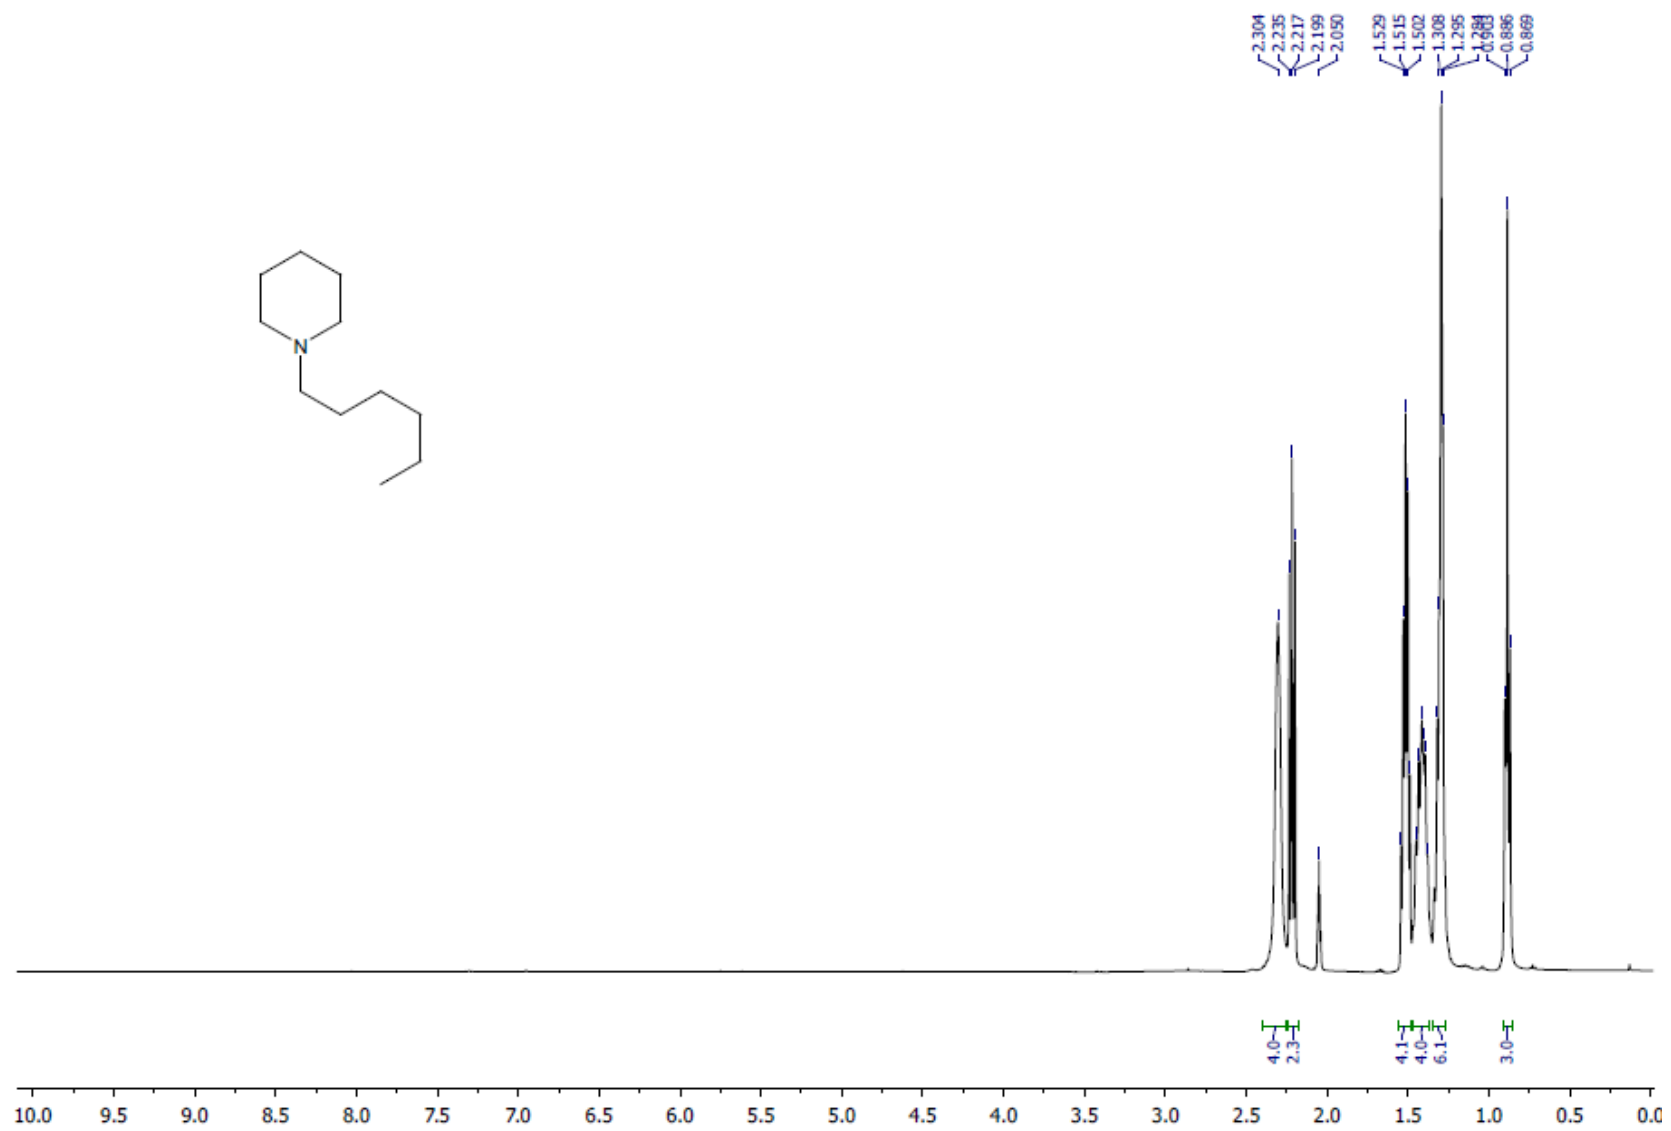

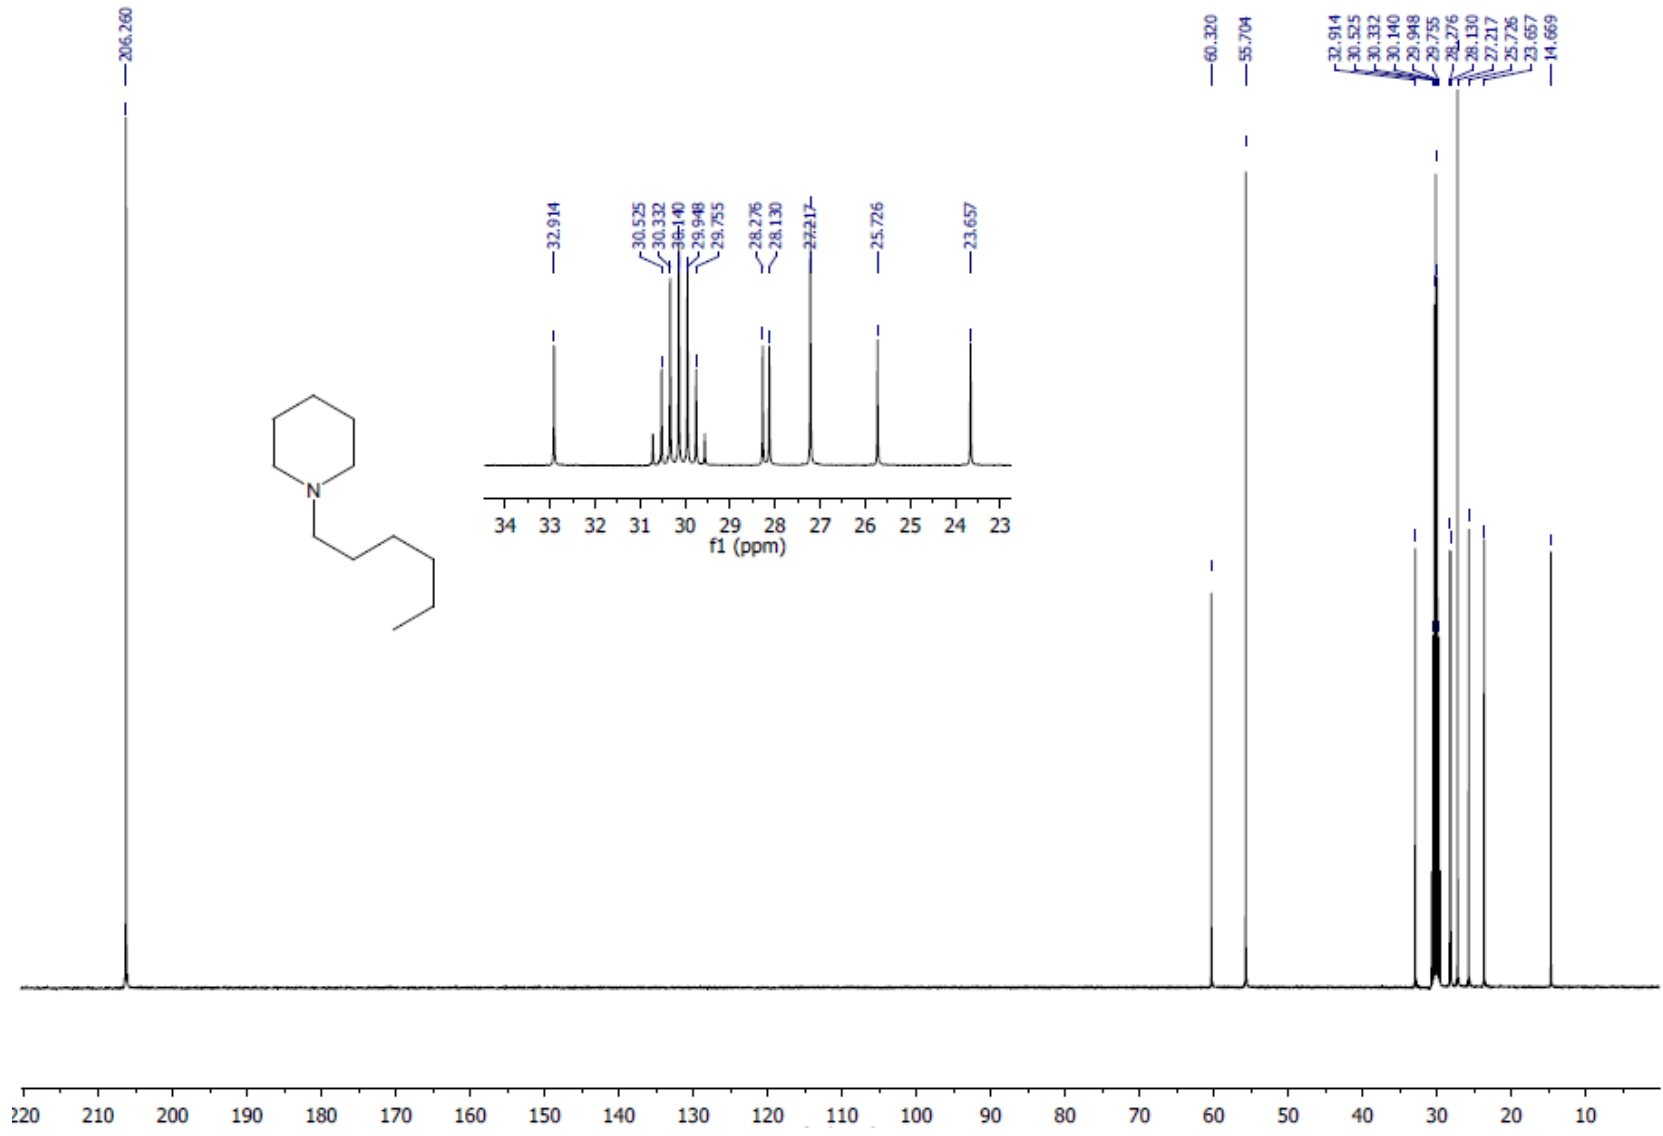

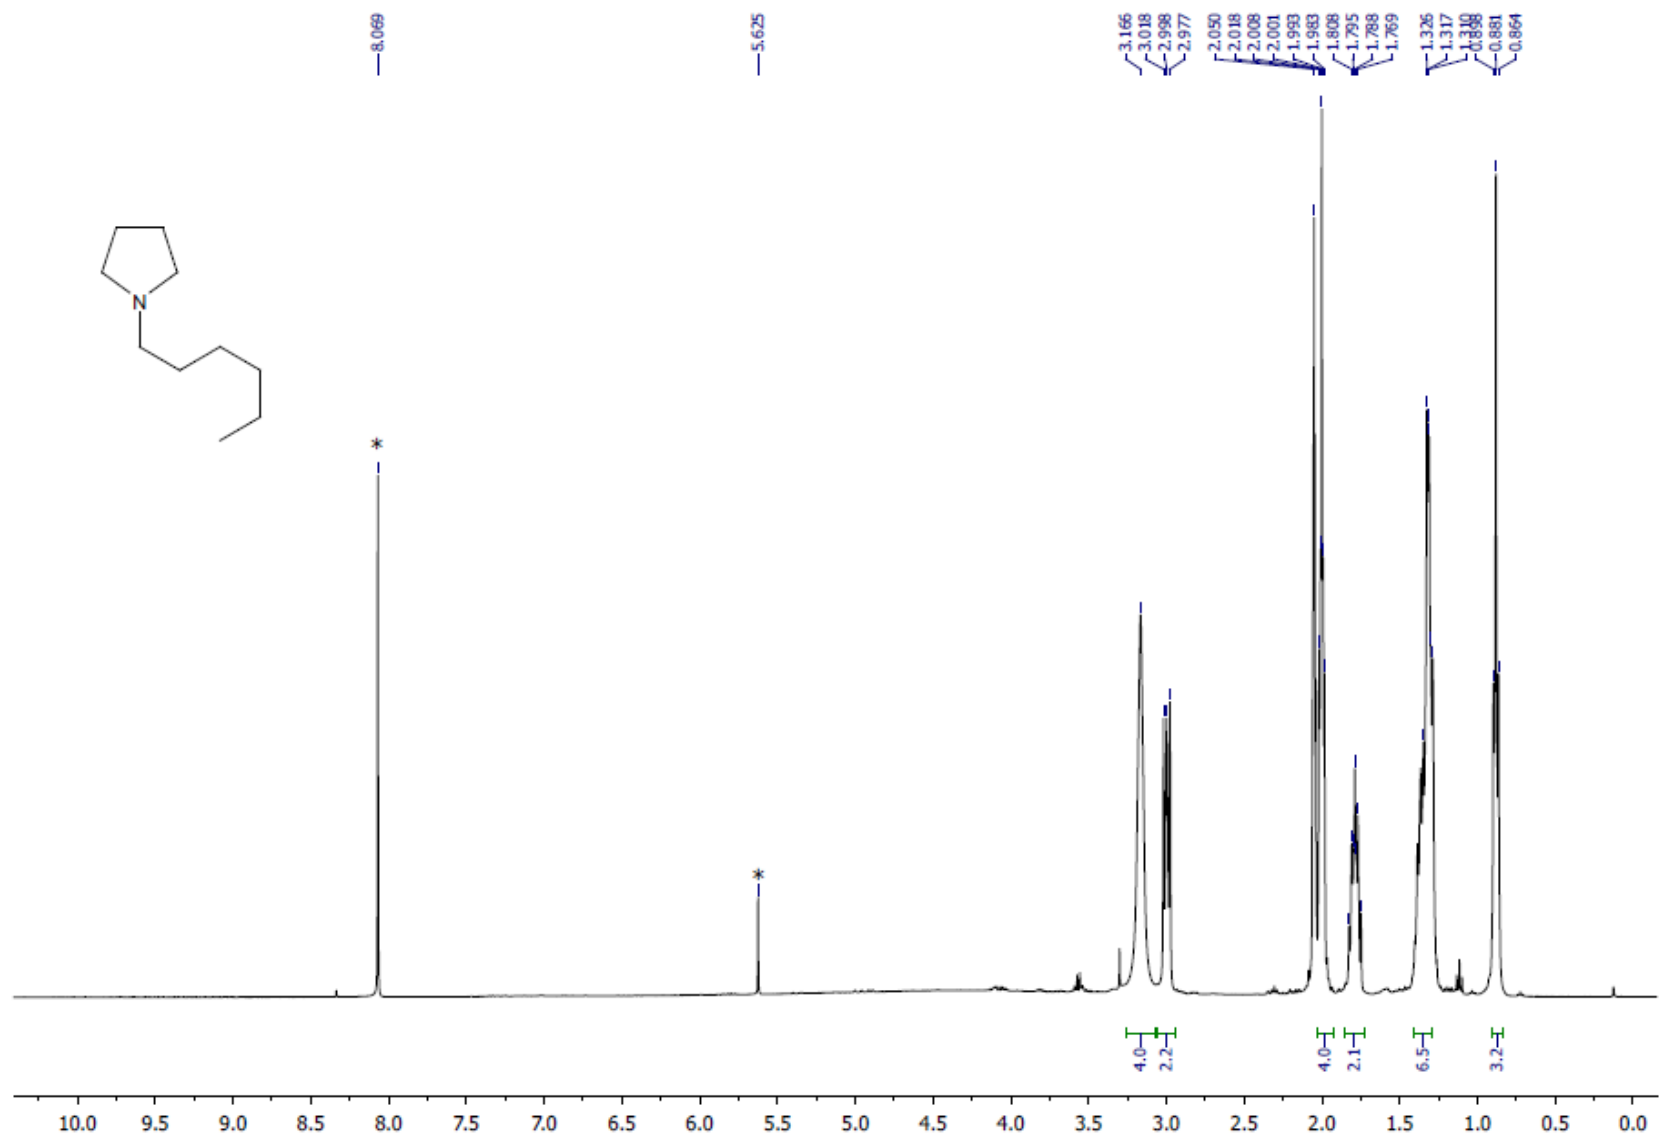

\* solvent signals

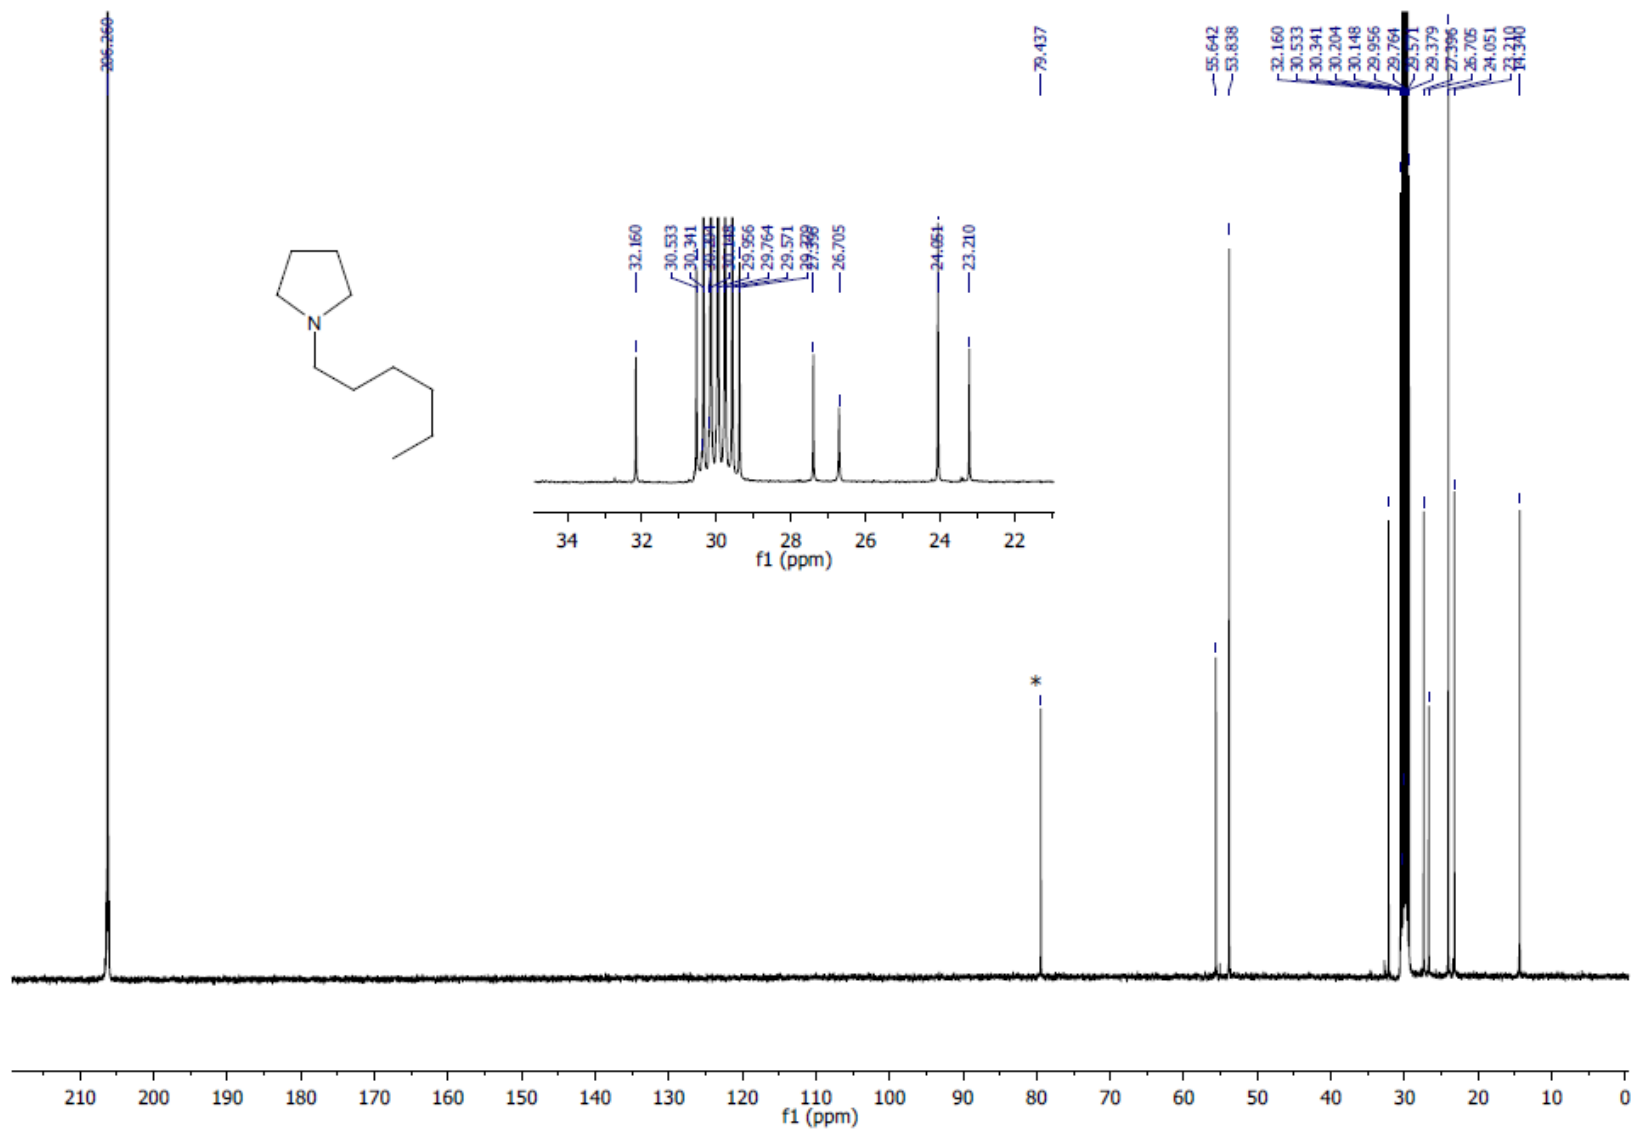

\*solvent signals

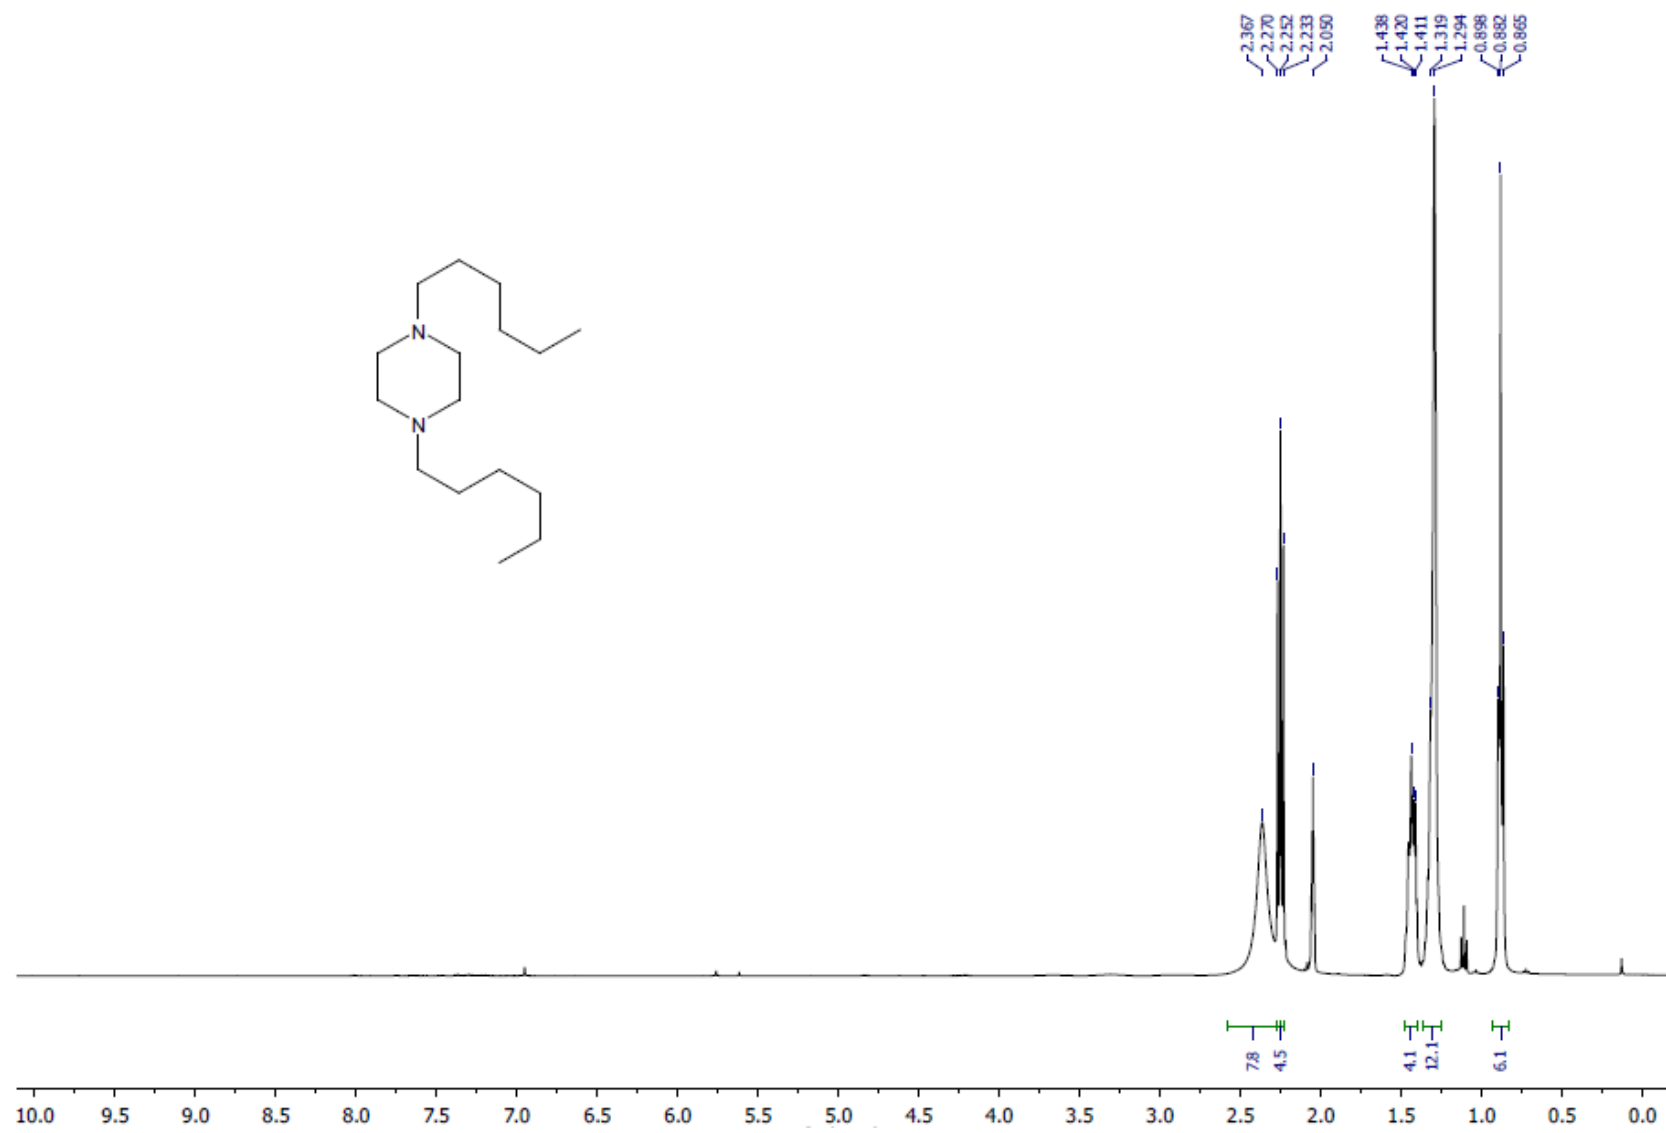



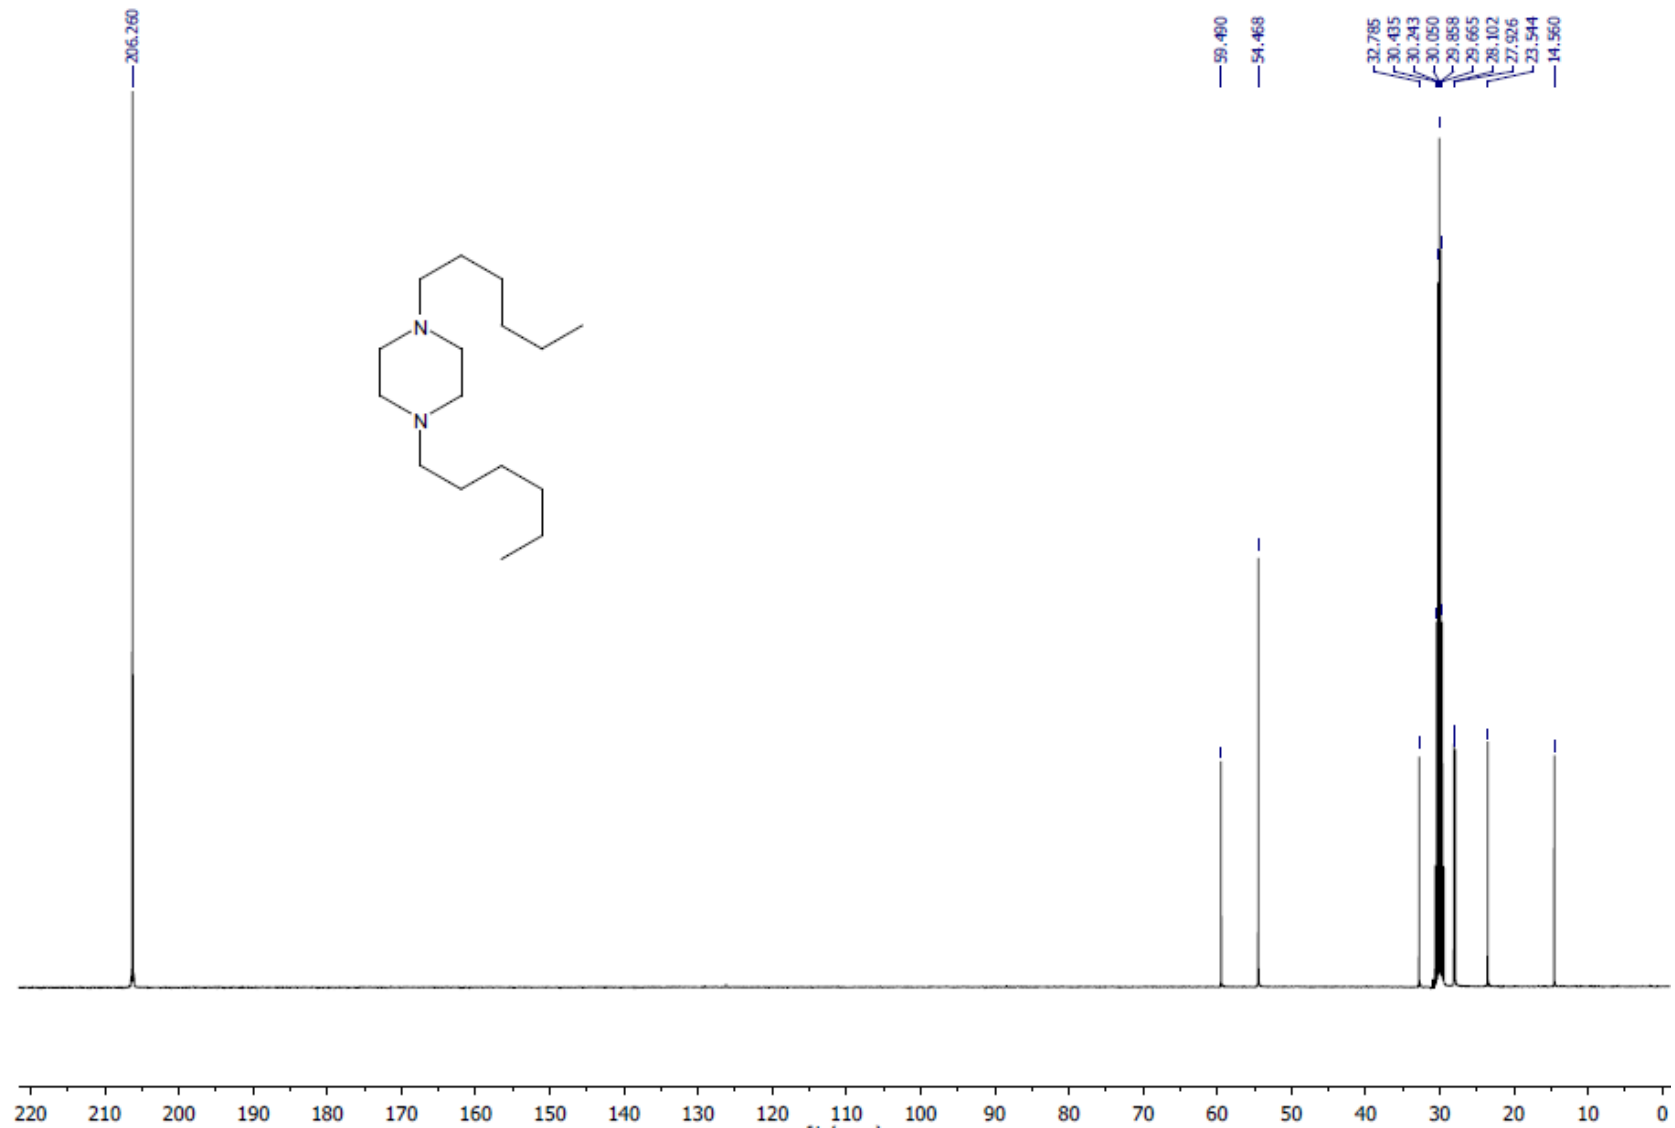

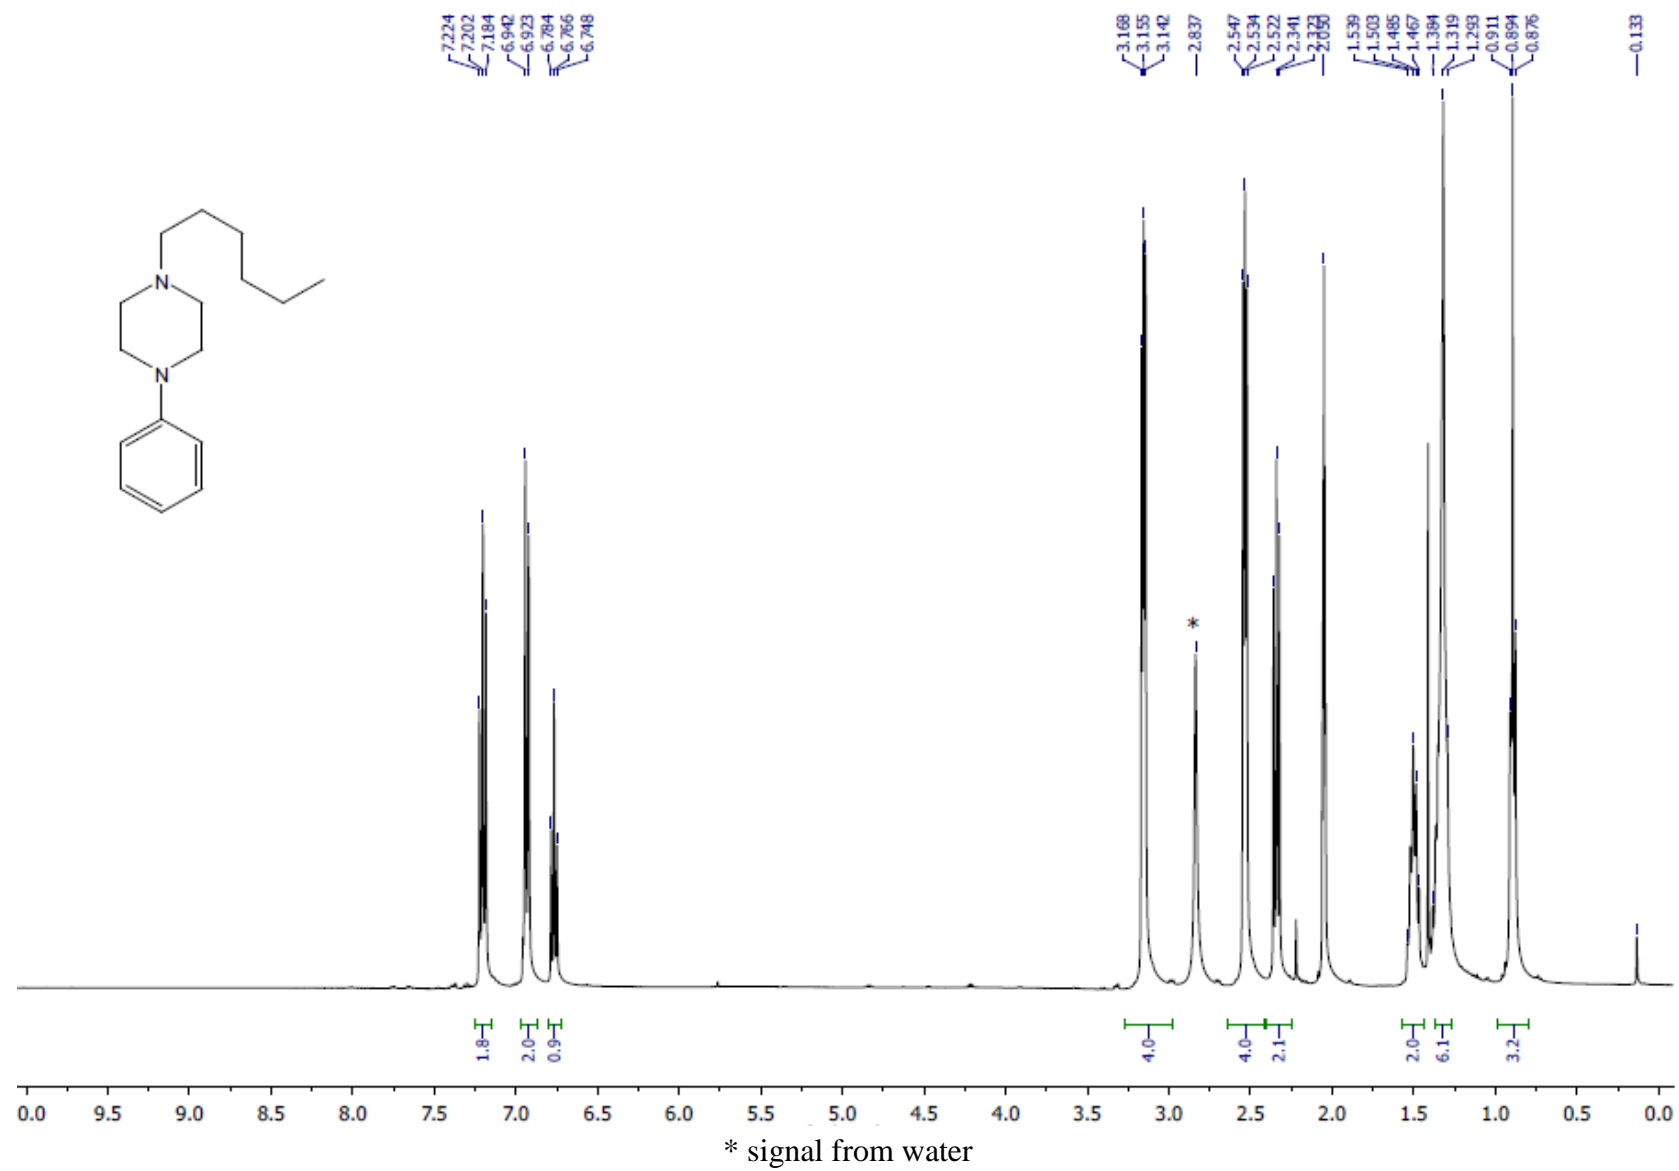

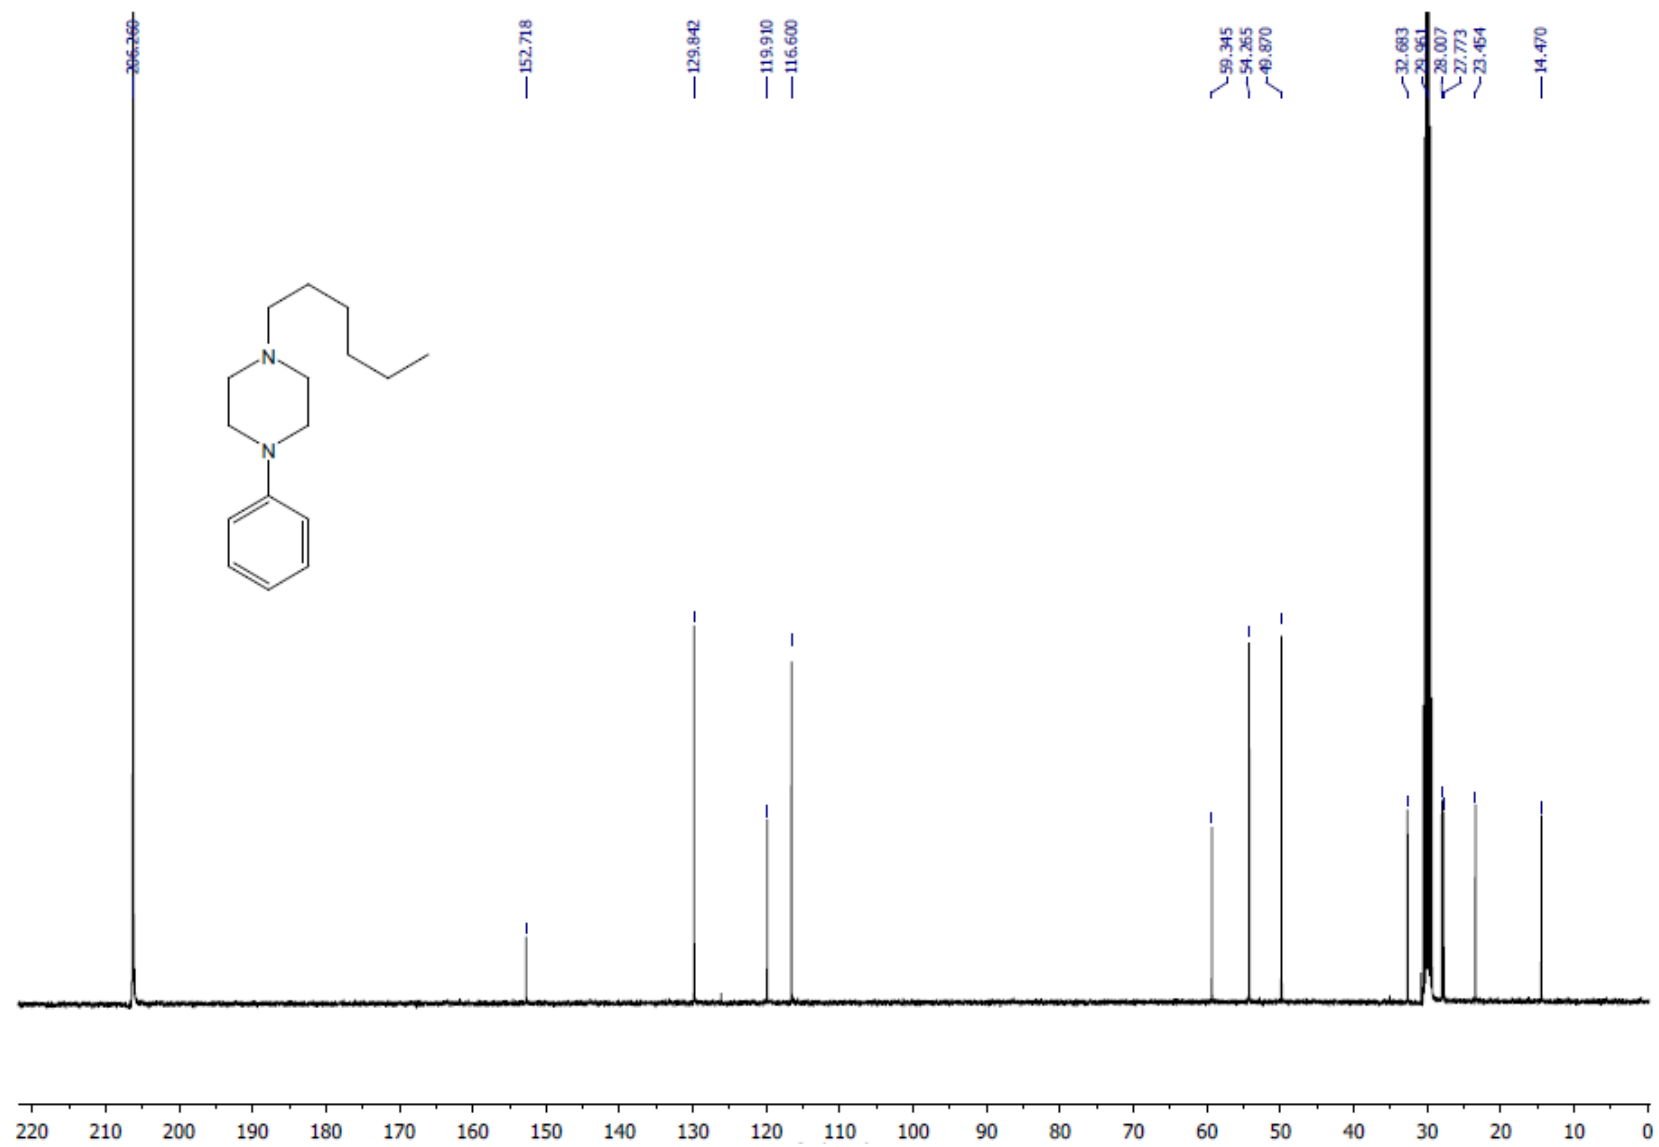

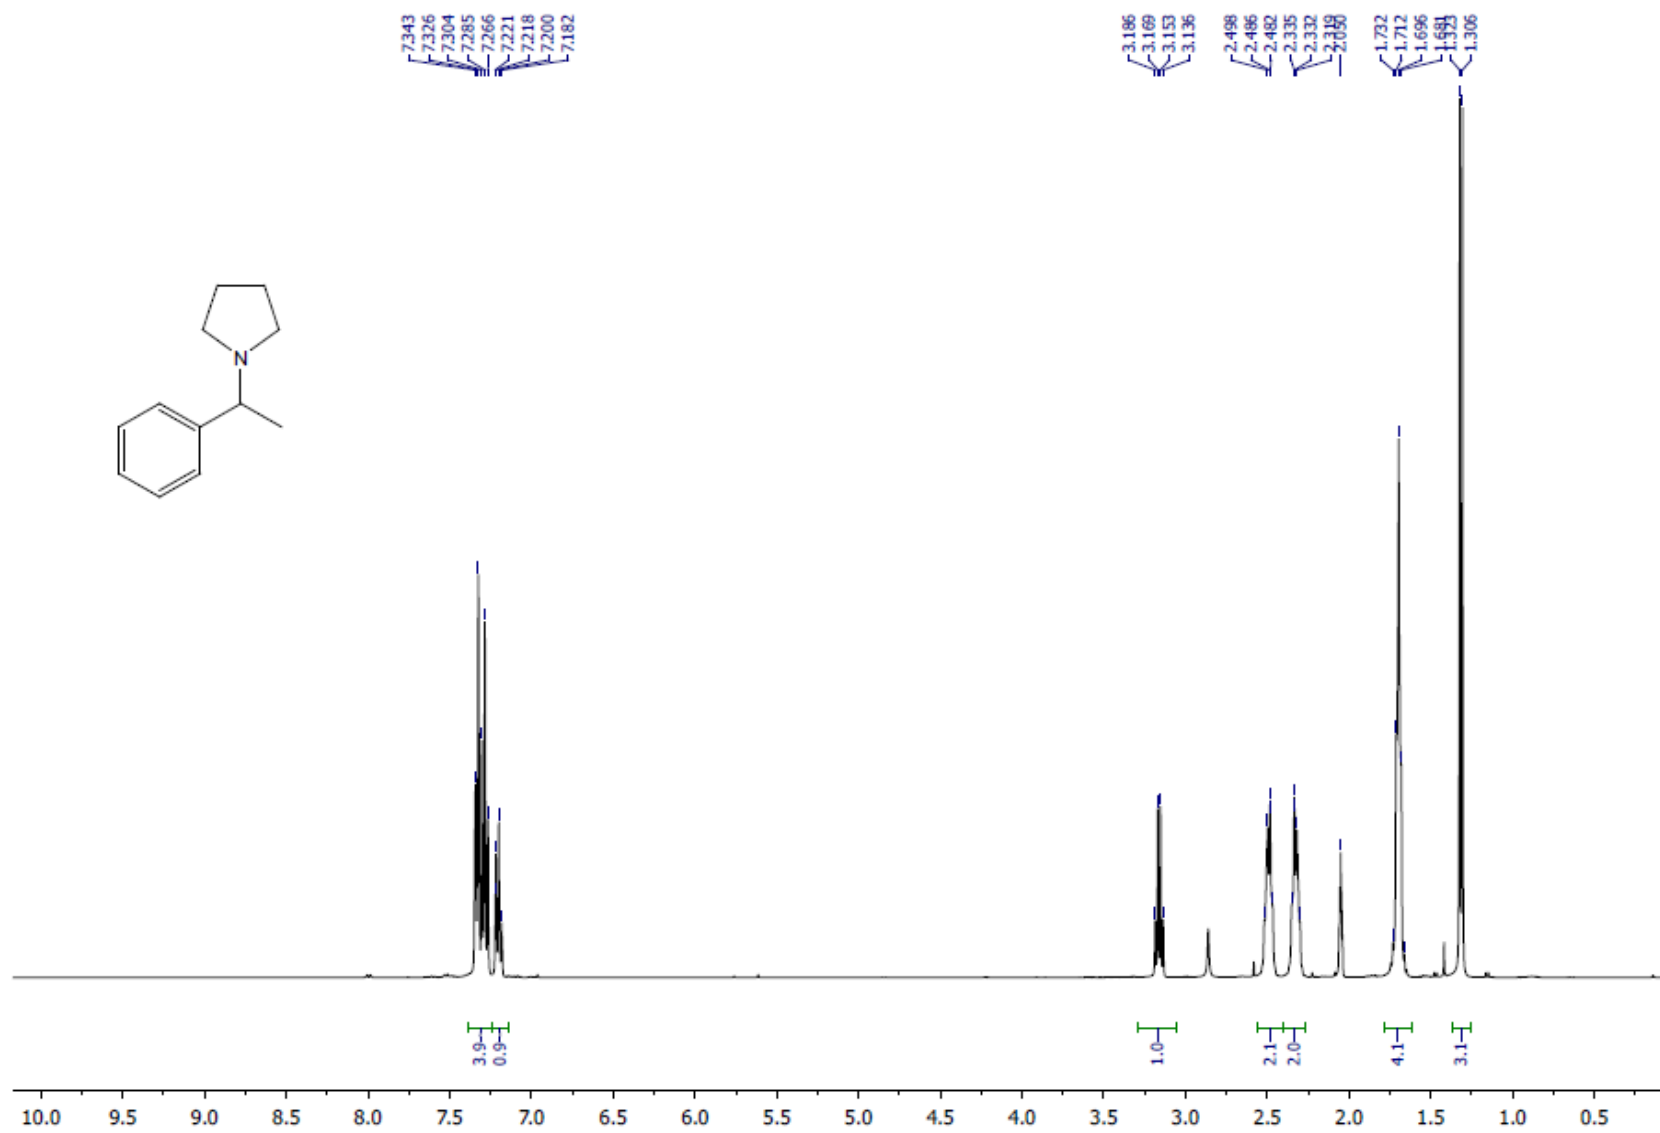

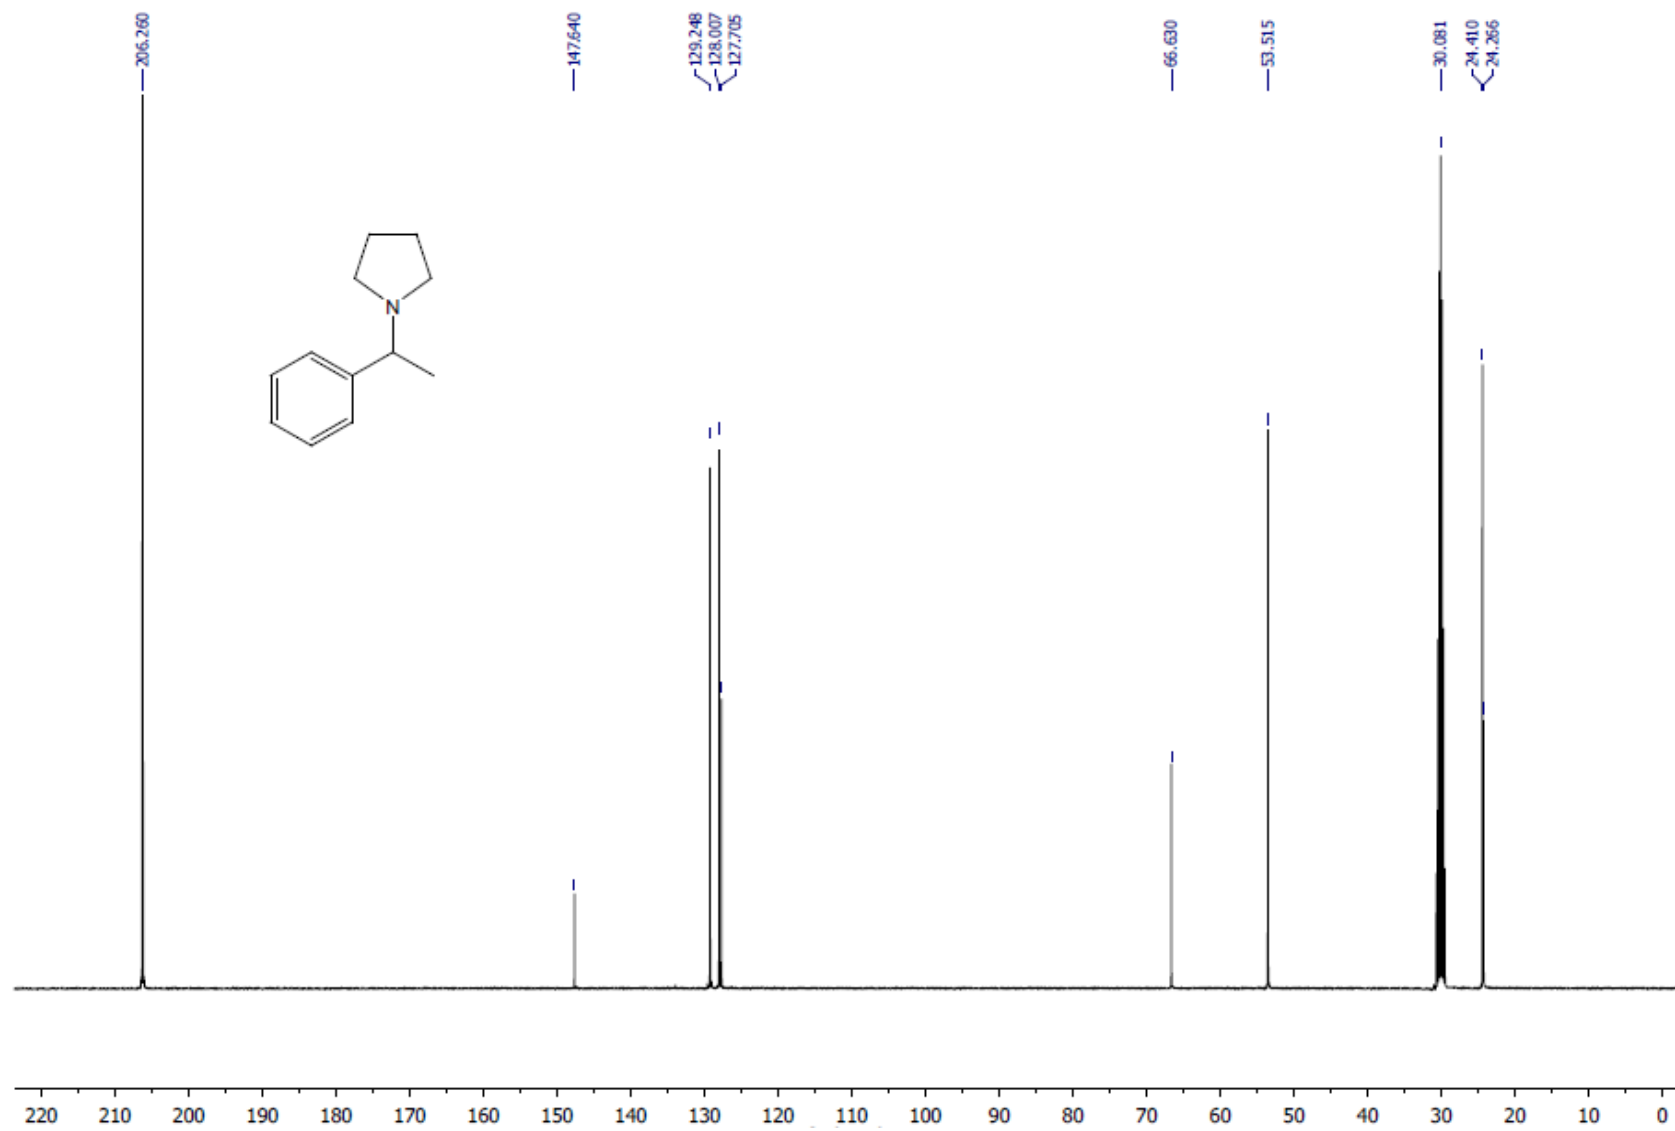

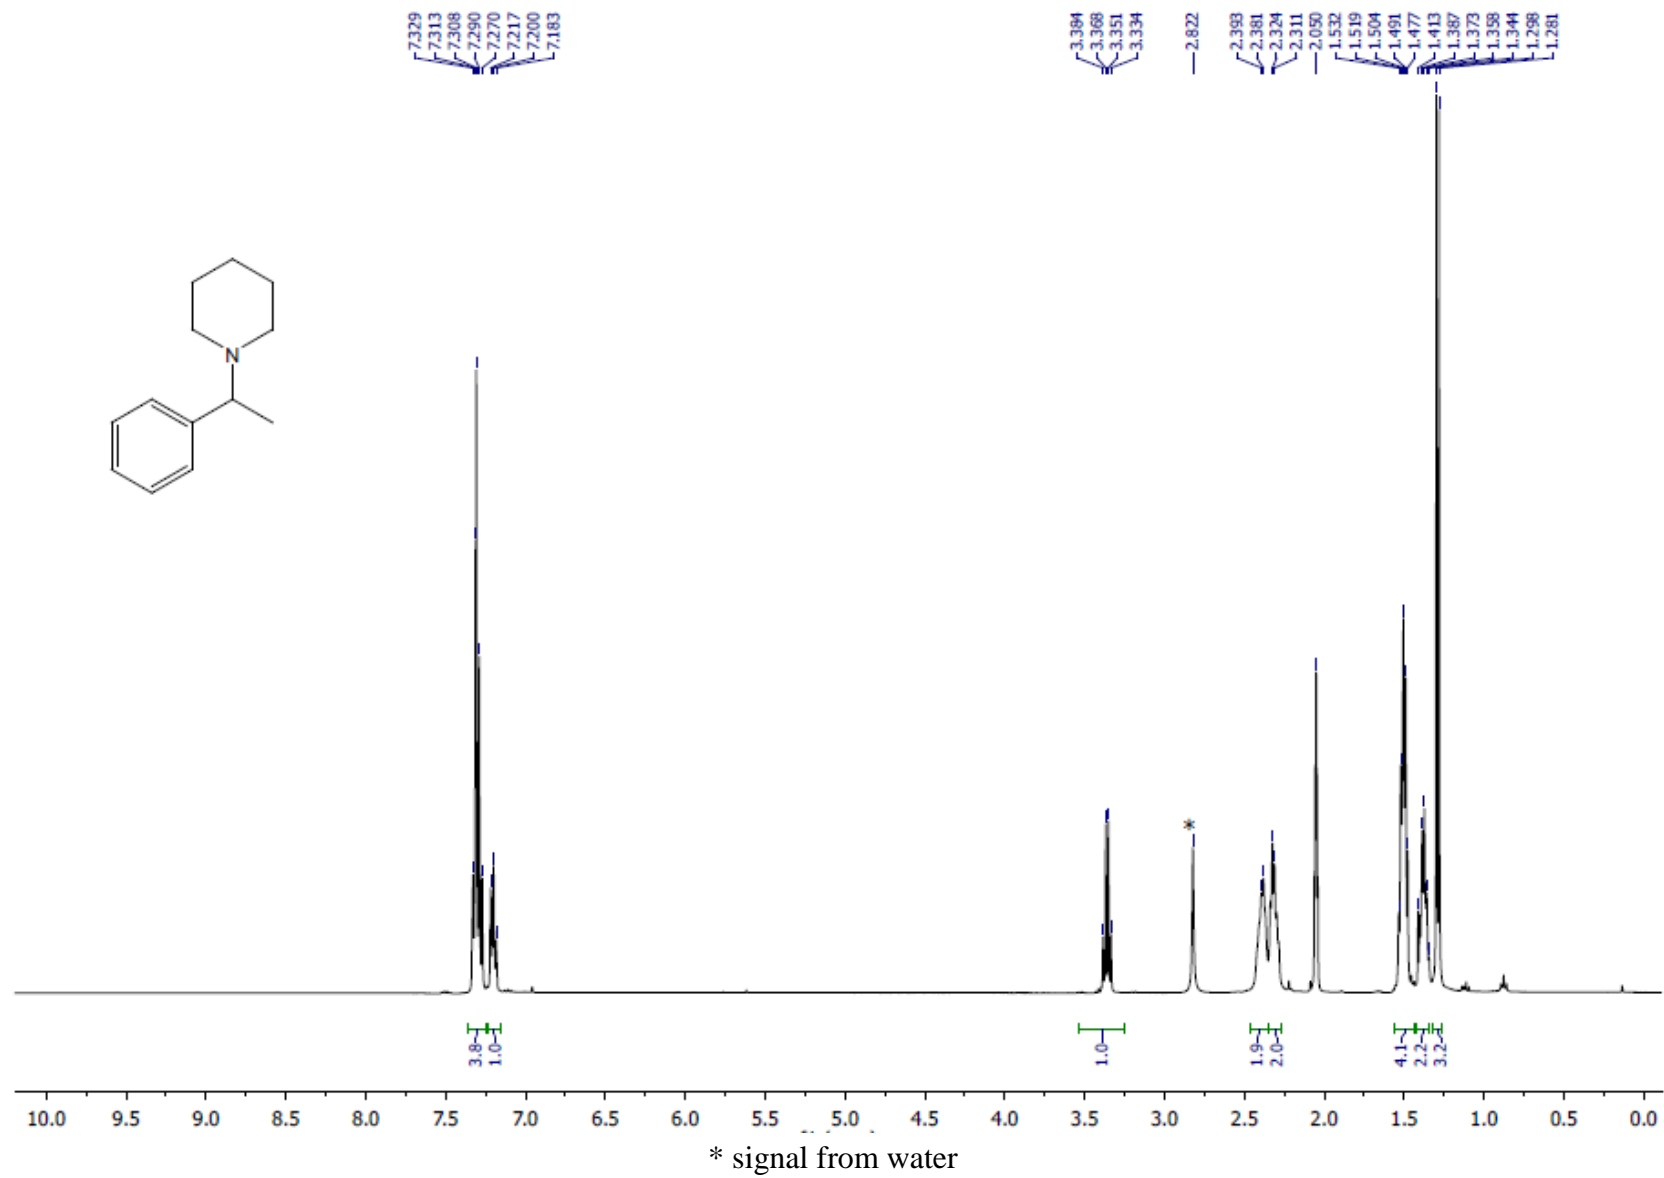

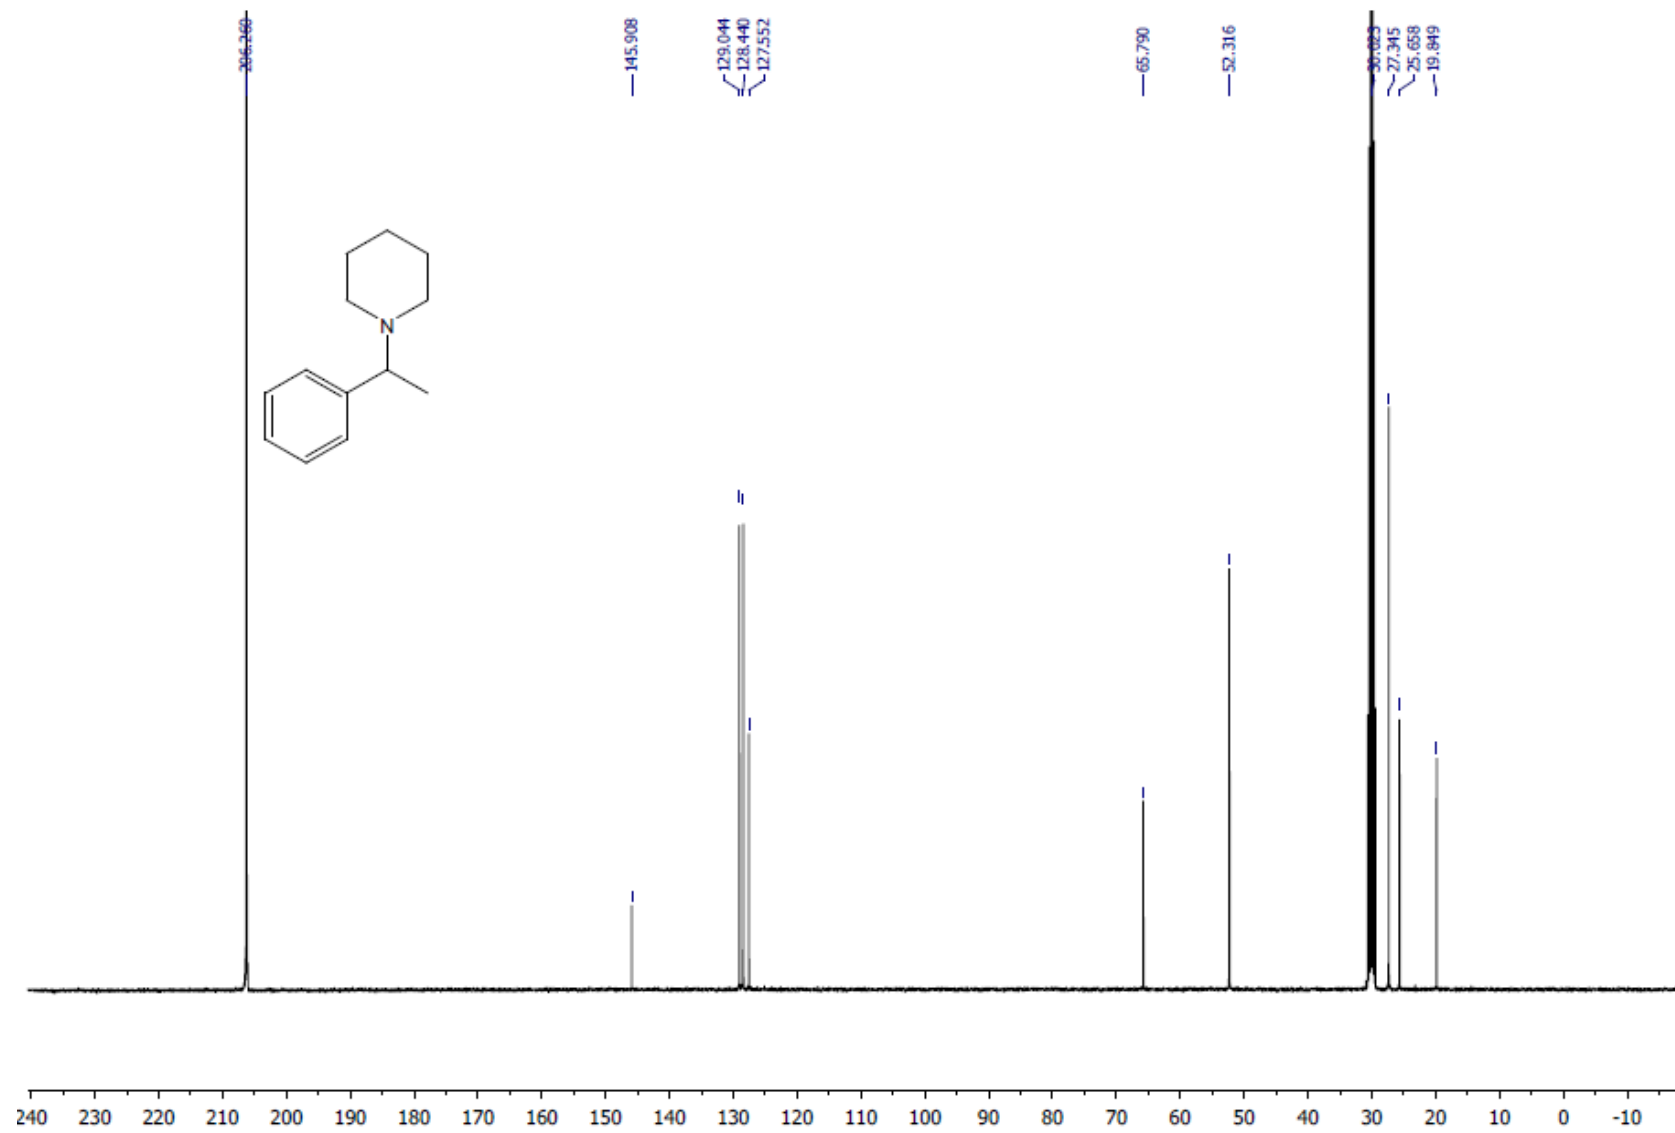

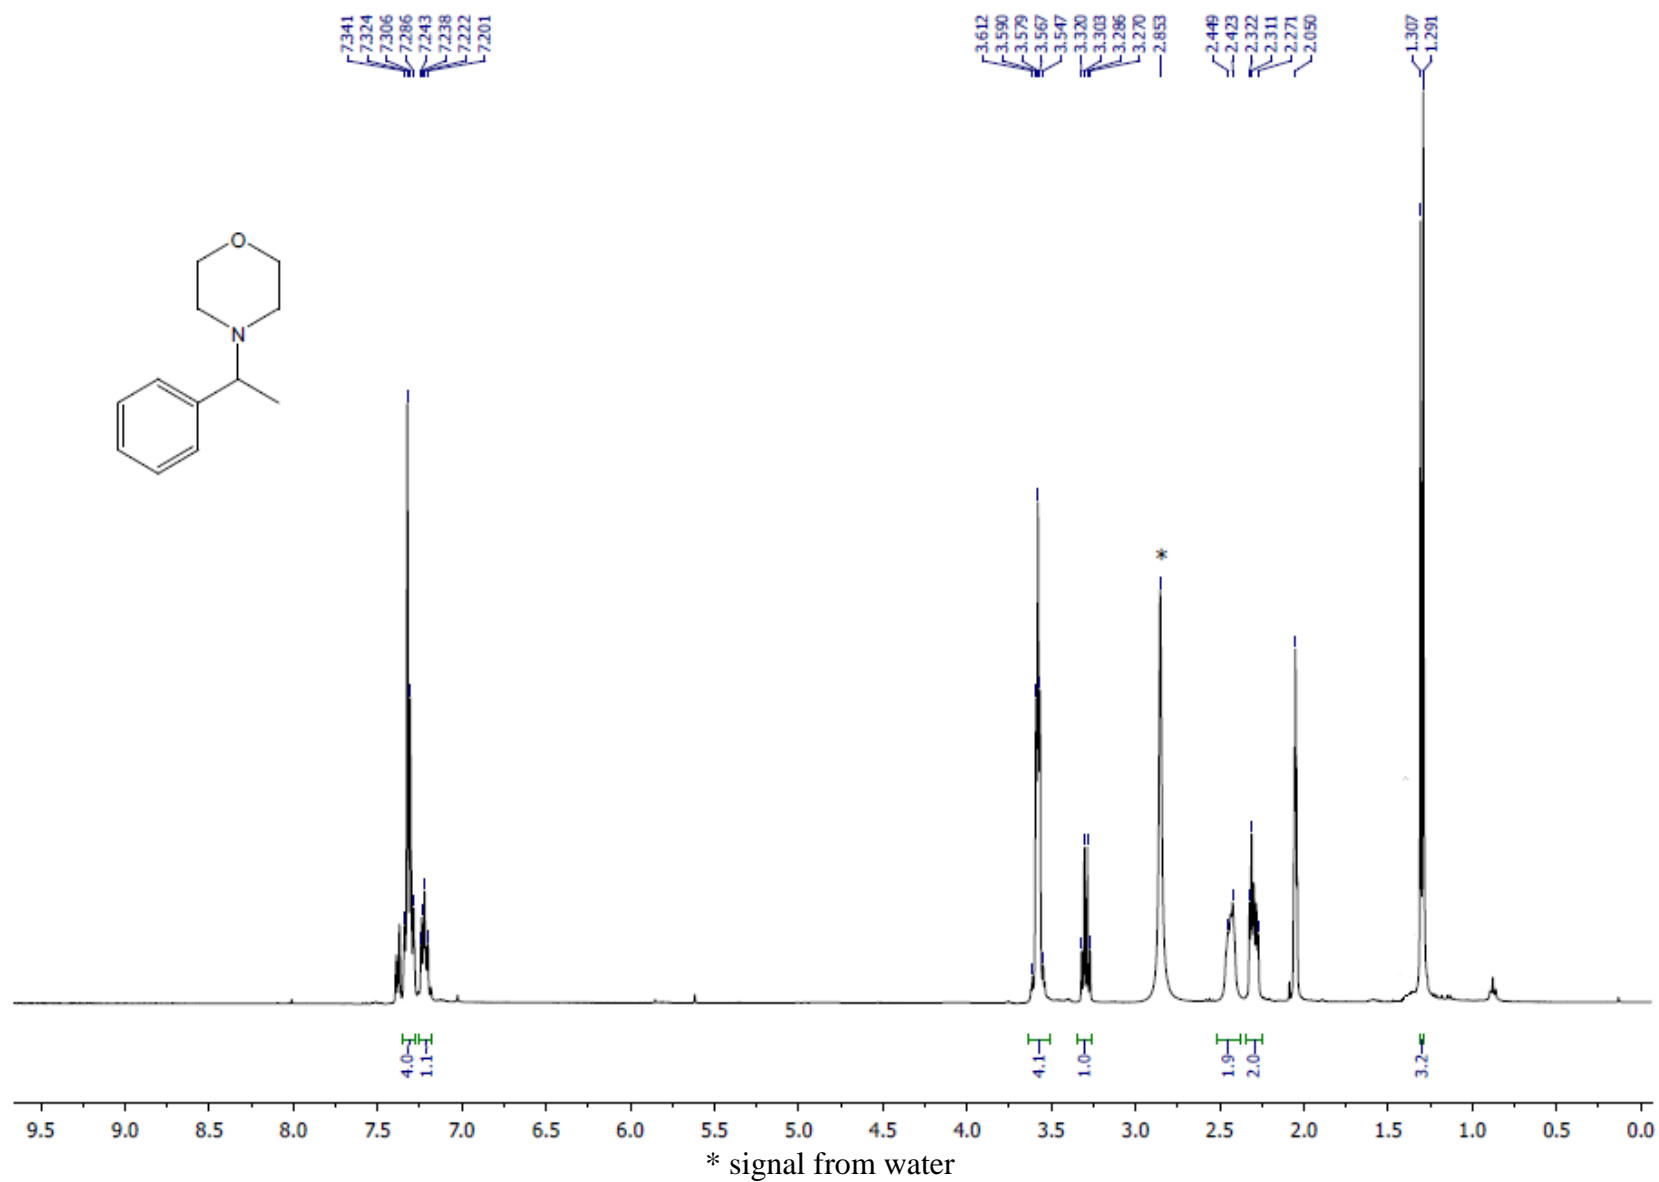



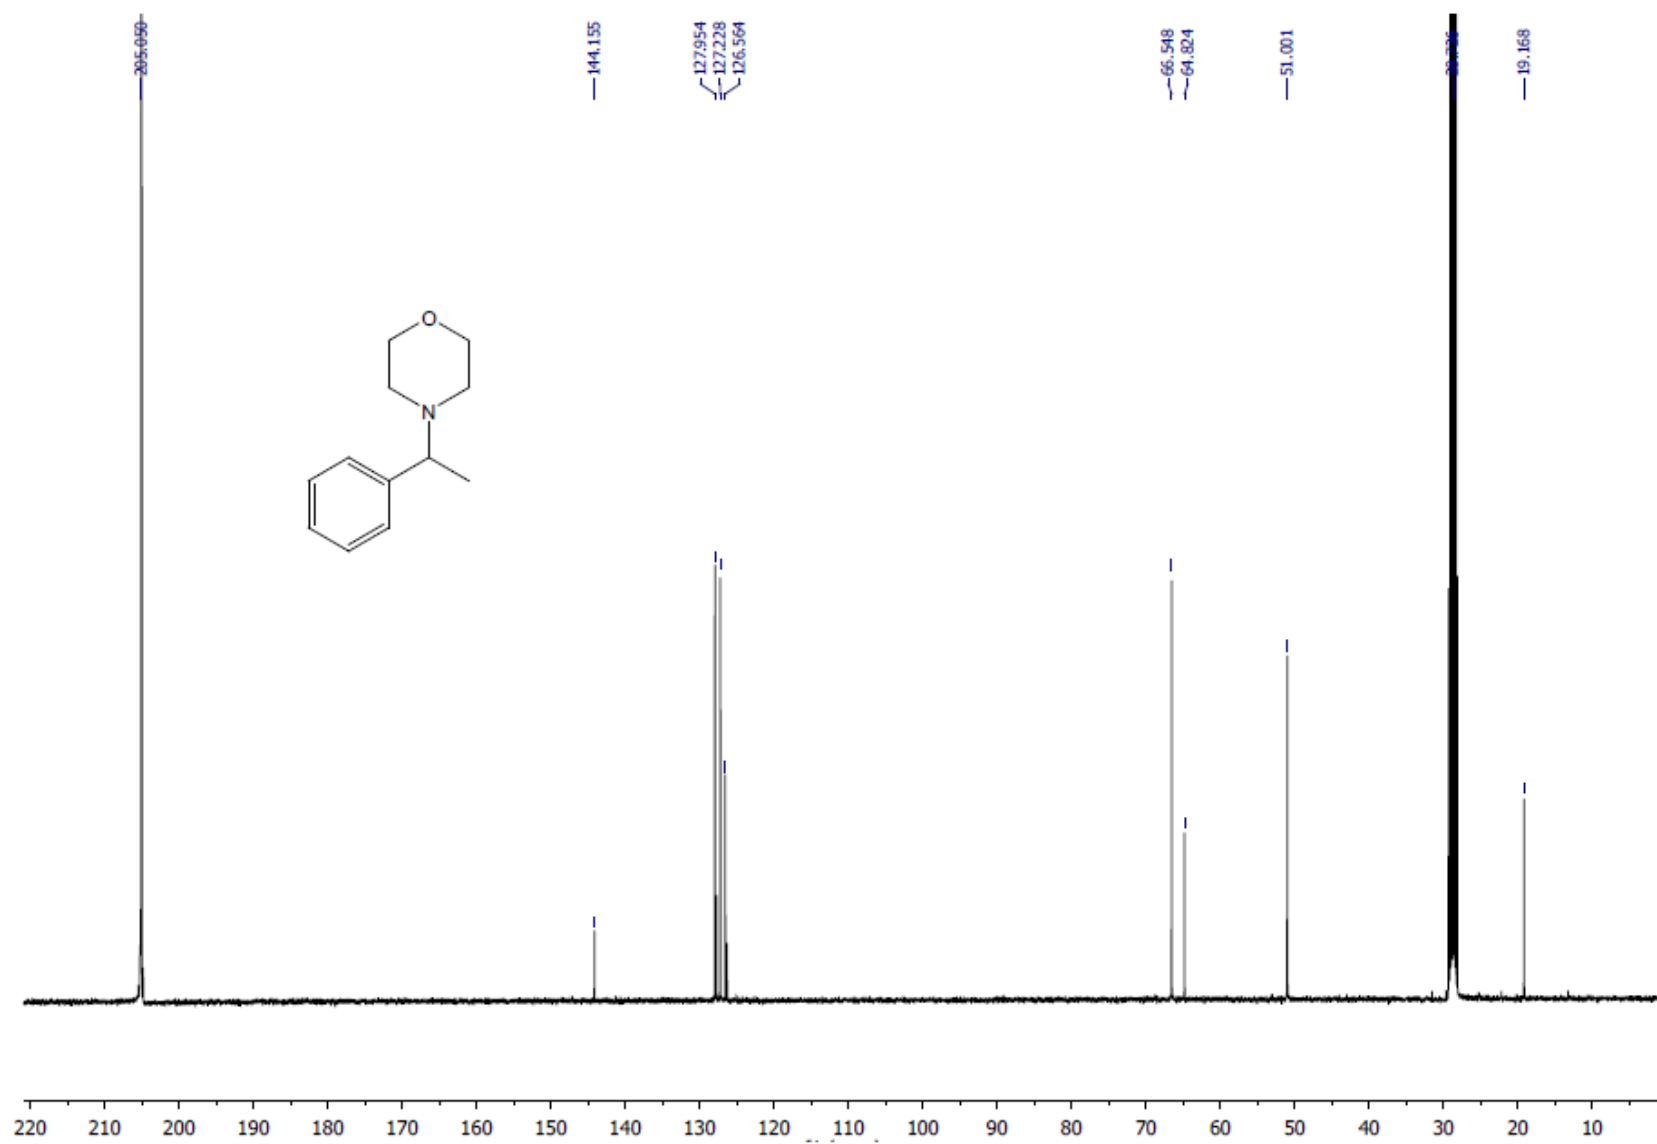

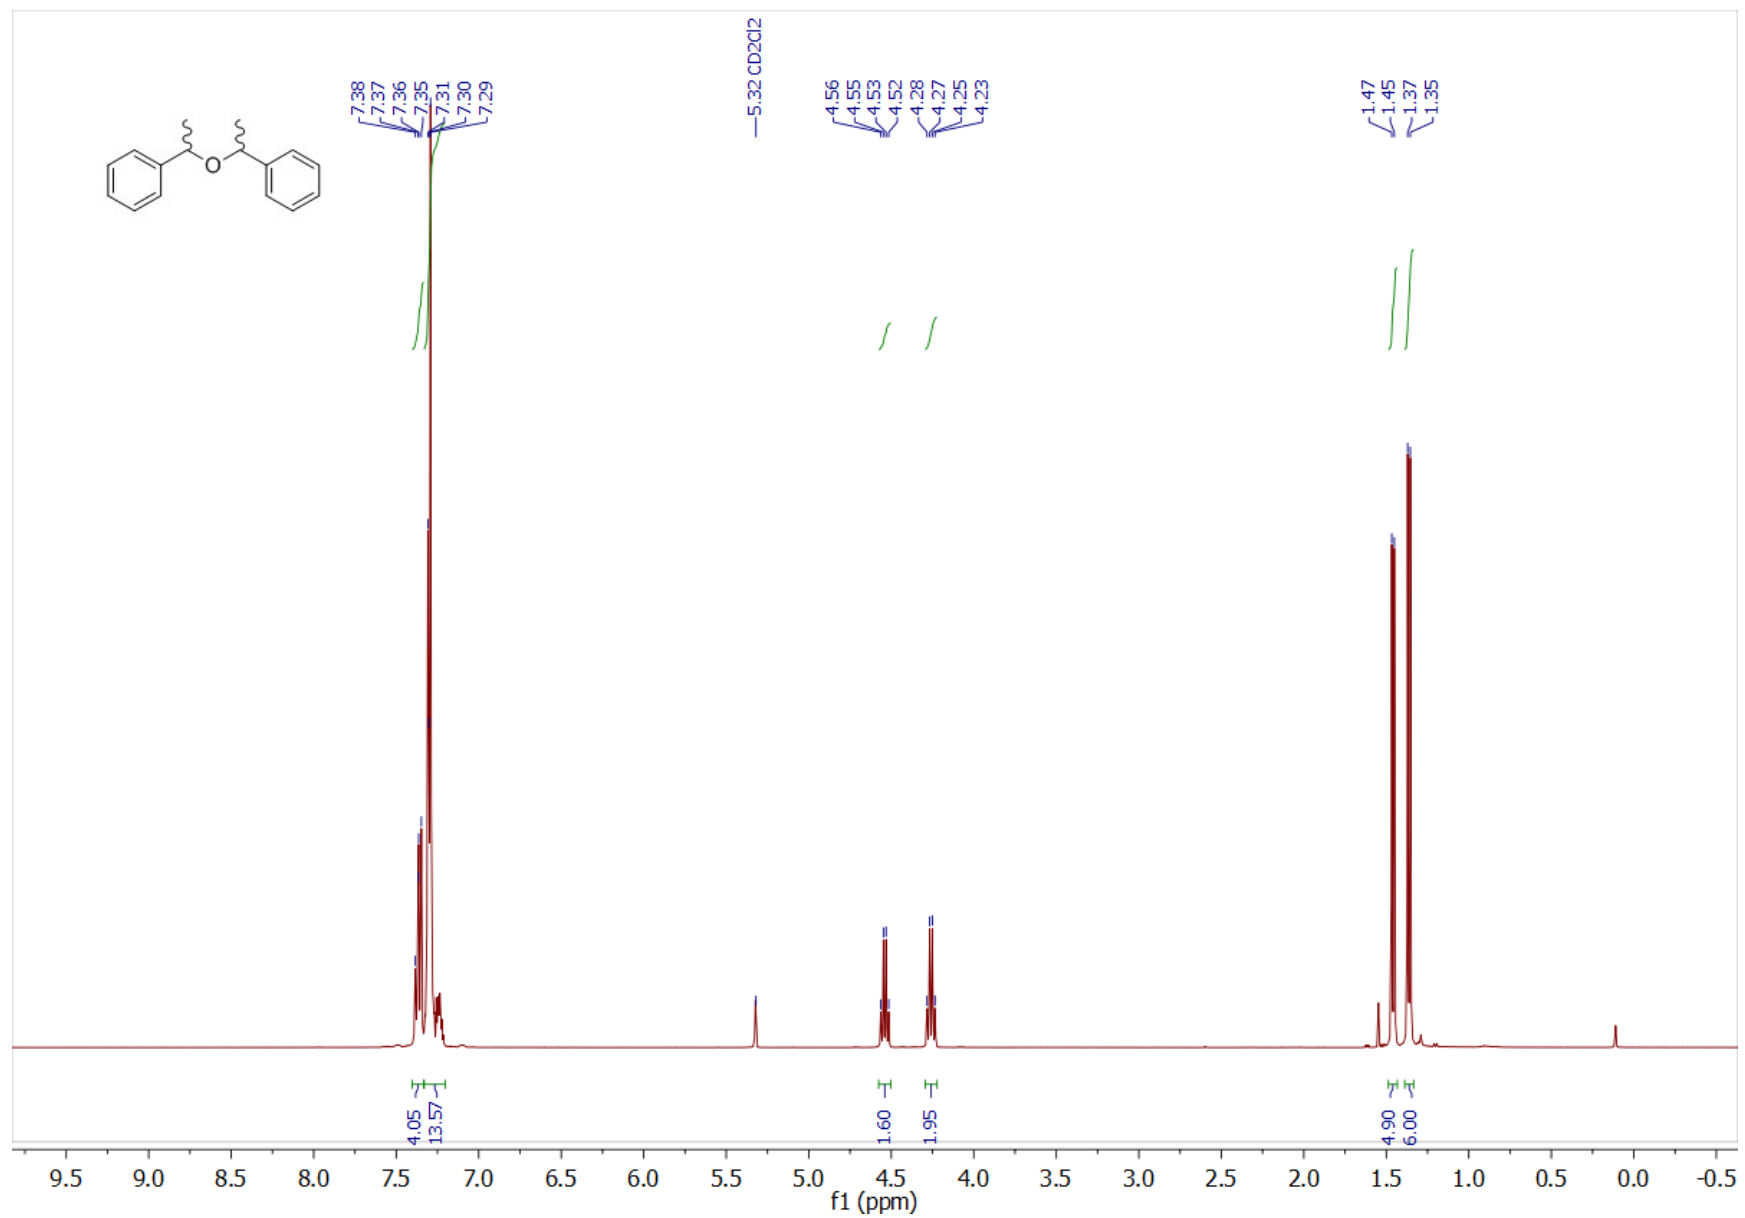

S39

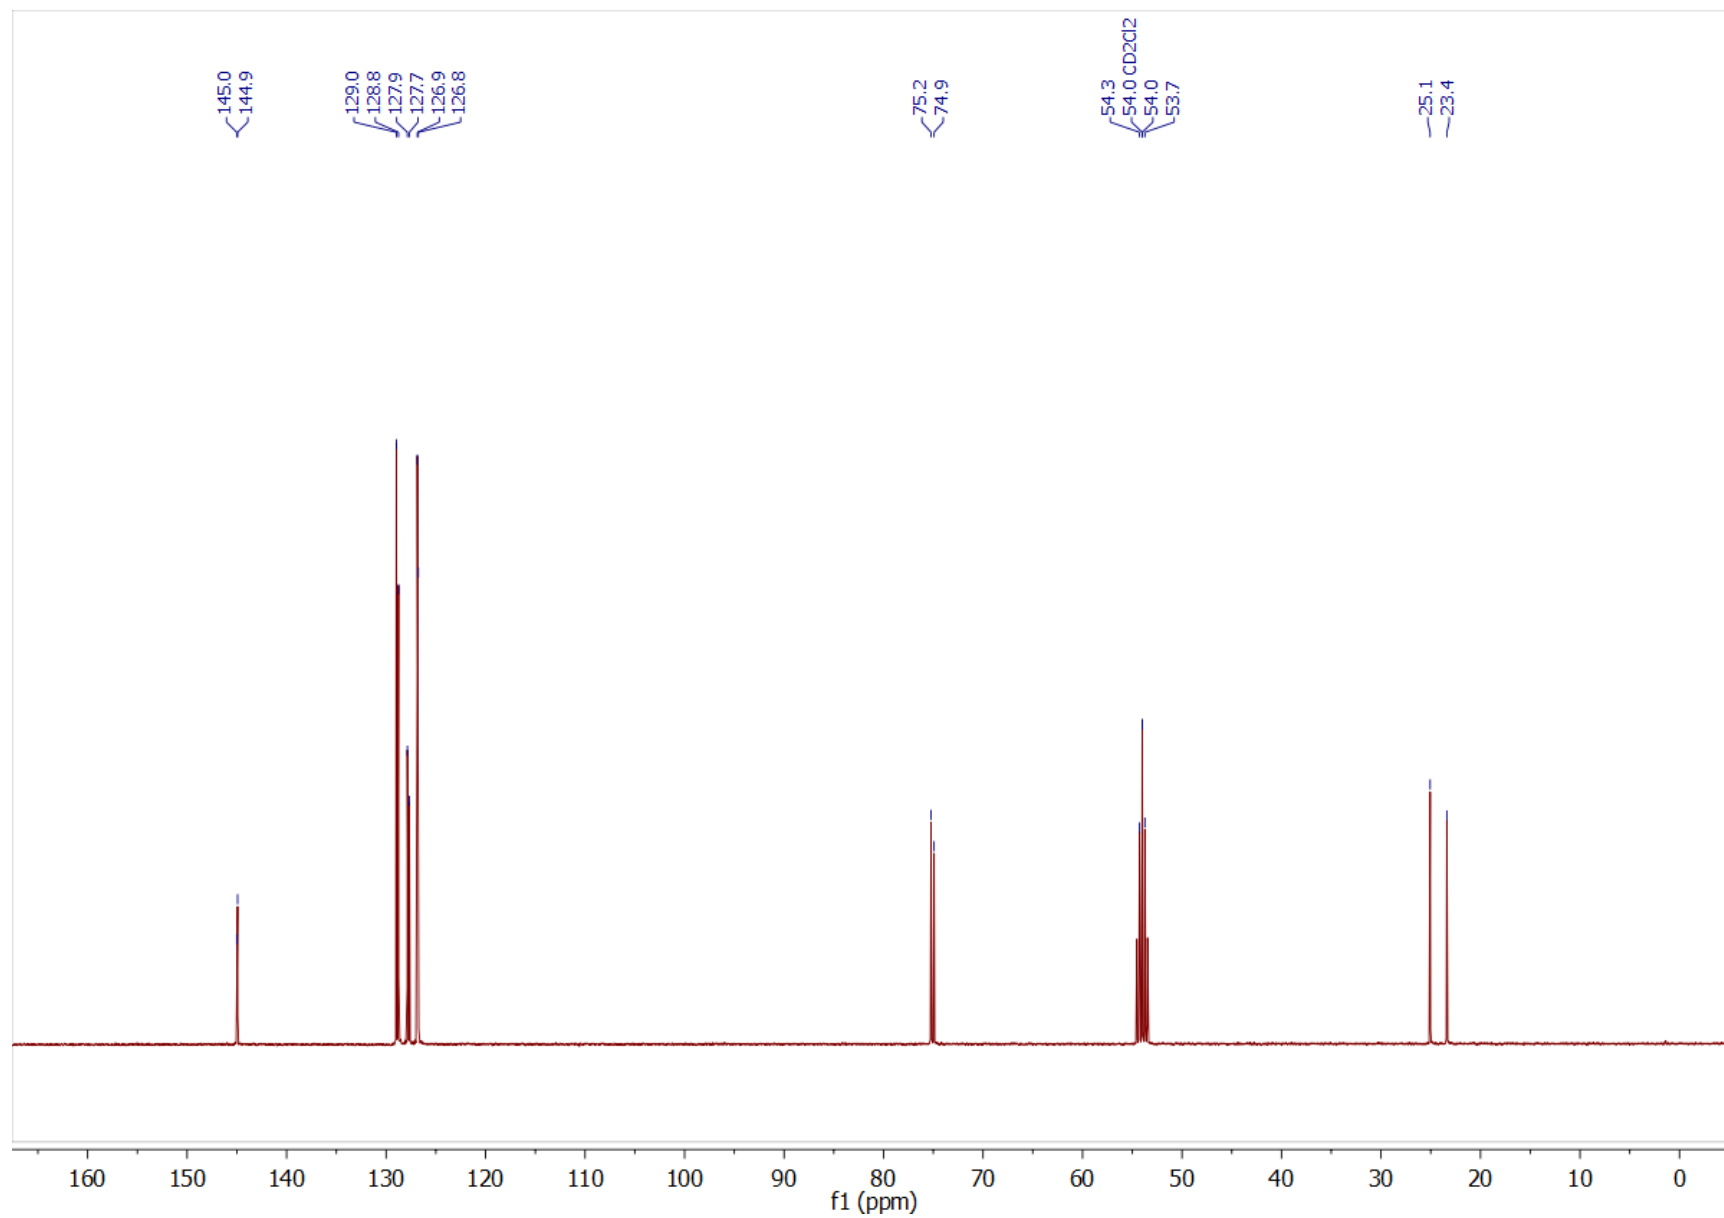

S40
